# Supplementary material for: Predictive crystallography at scale: mapping, validating, and learning from 1000 crystal energy landscapes
Source: PubMed Central journal article supplement (PMC11413732; doi:10.1039/d4fd00105b), 2024-06-03
Supplement: FD-OLF-D4FD00105B-s001.pdf [file FD-OLF-D4FD00105B-s001.pdf]

# Predictive crystallography at scale: mapping, validating, and learning from 1,000 crystal energy landscapes—Supporting Information

Christopher R. Taylor<sup>a</sup>, Patrick W. V. Butler<sup>a</sup>, and Graeme M. Day<sup>a\*</sup>

<sup>a</sup>School of Chemistry, University of Southampton, Southampton, SO17 1BJ, UK

\*Corresponding author: [g.m.day@soton.ac.uk](mailto:g.m.day@soton.ac.uk)

# Contents

|                                                                                     |            |
|-------------------------------------------------------------------------------------|------------|
| <b>S1 Computational Details</b>                                                     | <b>S3</b>  |
| S1.1 Crystal Structure Generation and Optimisation . . . . .                        | S3         |
| S1.2 Committee Neural Network Potentials . . . . .                                  | S5         |
| S1.3 MACE Potentials . . . . .                                                      | S5         |
| S1.4 Lattice Energy Correction Dataset . . . . .                                    | S5         |
| S1.5 PBE+D3 Total Energy Dataset . . . . .                                          | S6         |
| <b>S2 Results</b>                                                                   | <b>S7</b>  |
| S2.1 Learning Curves of $\Delta$ -ML Lattice Energy Correction . . . . .            | S7         |
| S2.2 Compound Distribution in Training Dataset . . . . .                            | S7         |
| S2.3 Lattice Energy Errors . . . . .                                                | S8         |
| S2.4 $\Delta$ -ML Lattice Energy Corrected Experimental Structure Ranking . . . . . | S9         |
| <b>S3 Molecular Data</b>                                                            | <b>S10</b> |
| <b>References</b>                                                                   | <b>S12</b> |

# S1 Computational Details

## S1.1 Crystal Structure Generation and Optimisation

CSP was performed using the Global Lattice Energy Explorer (GLEE) package,<sup>[1]</sup> which uses quasi-random sampling of crystal packing variables to generate trial crystal structures uniformly distributed across the lattice energy landscape, followed by rigid-molecule lattice energy minimisation using an anisotropic atom-atom intermolecular force field. All resulting local energy minima are treated as possible crystal structures of the molecule.

For a given molecular conformer, we generate quasi-random crystal packings using a Sobol low-discrepancy sequence to sample molecular positions and orientations, and unit cell lengths and angles (subject to space group symmetry constraints). Successful trial structures are those that satisfy simple geometric requirements of avoiding overlap between atomic van der Waals’ radii while maintaining reasonably dense packing (i.e. limiting the volume of the unit cell as a multiple of the molecular van der Waals’ volume,  $V_{\text{cell}} \leq 2.5 \times Z \times V_{\text{molecule}}$ , where  $Z$  is the number of molecules in the unit cell).

Space group symmetry is used to reduce the dimensionality of the search space, so that only the position and orientation of molecules in the asymmetric unit are sampled, with all other molecules in the unit cell generated by symmetry. In this study, we restrict ourselves to generating crystal structures with one independent molecule in the asymmetric unit ( $Z' = 1$ ). We sampled the 26 most commonly observed space groups for organic molecular crystals, listed in Table S1. These space groups cover over 99.4% of  $Z' \leq 1$  structures in the CSD.

A very small minority of molecules in our set (9 out of 1007) crystallise in uncommon symmetries whose  $Z' = 1$  equivalent structures would not be found in the 26 most common space groups. We elected to run additional, ad hoc sampling for these molecules only in the space groups that (in conjunction with an asymmetric unit of  $Z' = 1$ ) could lead to the experimental structure. The additional space groups and the molecules for which the additional sampling was performed are shown in Table S2.

The space groups were sampled equally, irrespective of their observed frequency in the CSD: quasi-random structures are generated and lattice energy minimised in each space group until 10,000 successfully energy minimised crystal structures were found (260,000 crystal structures per molecule). The CSP process is highly parallelisable, as each crystal structure structure is independent.

Trial crystal that passed geometric checks were lattice energy-minimised in a three-stage process. Non-electrostatic interactions (principally intermolecular dispersion and exchange-repulsion) were described by the FIT *exp* – 6 force field [2, 3], supplemented by fluorine parameters from Williams and Houpt<sup>[4]</sup> with F...X heteroatomic interaction parameters derived from combining rules applied to the parameters for homoatomic interactions: geometric mean values are used for the pre-exponential and dispersion parameters, and arithmetic mean for the length-scale in the exponential repulsion term.

Firstly, structures were optimised with PMIN [5] with fixed unit cell angles to avoid very acute unit cell angles being reached during optimisation. The resulting crystal structures were re-optimised using DMACRYS [3] with a small external pressure of 0.1 GPa to assist with convergence, allowing all crystalline degrees of freedom (that preserve the space group symmetry) to adjust. Atomic point charge electrostatics was used in these first two stages. Finally, the resulting structures were re-optimised in DMACRYS, now using the full set of atomic multipoles and no external pressure to yield the final crystal structures and their energy ranking on the landscape.

It is commonplace that multiple unique initial configurations optimise to the same local energy minimum. We remove these duplicates via a two-step procedure. A initial, fast identification of duplicate crystal structures was performed by comparing simulated powder X-ray diffraction (PXRD) patterns (generated in the PLATON package) [6] using a constrained dynamic time-warping approach we have

employed previously [7], using strict comparison criteria to remove only near-identical structures. We then further filter this set based on structural comparisons using the COMPACK [8] algorithm as implemented in the CSD Python API, overlaying 30-molecule clusters of the crystal structures being compared. For efficiency, only structures within  $1.0 \text{ kJ mol}^{-1}$  of lattice energy and  $0.05 \text{ g cm}^{-3}$  in density were compared; structures were considered duplicates if interatomic distances and angles within 30-molecule clusters matched using distance and angle tolerances of 30% and  $30^\circ$  respectively. In both duplicate removal steps, we choose to retain the lowest-energy representative of a group of duplicate structures.

| IUCr Tables Number | Short Symbol |
|--------------------|--------------|
| 1                  | $P1$         |
| 2                  | $P\bar{1}$   |
| 4                  | $P2_1$       |
| 5                  | $C2$         |
| 7                  | $Pc$         |
| 9                  | $Cc$         |
| 13                 | $P2/c$       |
| 14                 | $P2_1/c$     |
| 15                 | $C2/c$       |
| 18                 | $P2_12_12$   |
| 19                 | $P2_12_12_1$ |
| 20                 | $C222_1$     |
| 29                 | $Pca2_1$     |
| 33                 | $Pna2_1$     |
| 43                 | $Fdd2$       |
| 56                 | $Pccn$       |
| 60                 | $Pbcn$       |
| 61                 | $Pbca$       |
| 76                 | $P4_1$       |
| 86                 | $P4_2/n$     |
| 88                 | $I4_1/a$     |
| 96                 | $P4_32_12$   |
| 145                | $P3_2$       |
| 148                | $R3$         |
| 154                | $P3_22_1$    |
| 169                | $P6_1$       |

Table S1: The list of space groups sampled in all CSPs for all molecules in our set, ordered in accordance with their IUCr Tables number. Note that, due to our CSP workflow requiring asymmetric units of  $Z' = 1$ , meaning that the appropriate space group to locate an experimental match is not necessarily the space group assigned in the CSD (i.e. if the CSD structure has  $Z' < 1$ ).

| IUCr Tables Number | Short Symbol   | Compounds        |
|--------------------|----------------|------------------|
| 18                 | $P2_12_12$     | MEGNES           |
| 45                 | $Iba2$         | GEYFOF, NTCHPE   |
| 92                 | $P4_12_12$     | IHEPUG, QEGSOL   |
| 110                | $I4_1cd$       | NICREW           |
| 114                | $P\bar{4}2_1c$ | CUDJIU01, CUMJOJ |
| 122                | $I\bar{4}2d$   | JEZOD            |

Table S2: The list of uncommon space groups that were additionally sampled on an ad-hoc basis for a small number of compounds whose experimental crystal symmetries would not be covered by the general set in Table S1, with the list of compounds for which each space group was included (named according to their CSD refcode).

## S1.2 Committee Neural Network Potentials

All NNPs that constituted our lattice energy correction were developed with the n2p2 package[9, 10] and used an input of weighted atom-centred symmetry functions (ACSFs)[11, 12] with a radial cutoff of 8.0 Å. A total of 64 radial and angular symmetry functions were used per element, with the ACSFs determined by a CUR decomposition using the data from a large pool of ACSFs calculated on 30,000 randomly selected structures from the CSPs. The neural network architecture of the NNPs consisted of two hidden layers containing 30 neurons each. In all cases the softplus activation function was used in the hidden layers. The network parameters were initialised by the Nguyen-Widrow scheme and were subsequently optimised during training by the Kalman filter method. A 90:10 train:validation split was used throughout and the parameters from the epoch with the lowest validation energy MAE were selected following training. For each member of the ensemble the random number generator for initialising the parameters and splitting the dataset was independently seeded.

The full NNP-corrected CSP landscapes and the NNP model itself are available from DOI: 10.5258/SOTON/D3094.

## S1.3 MACE Potentials

For computational efficiency in the geometry optimisations small MACE[13] models were trained consisting of 96 channels, max L of 0, and a radial cutoff of 4.5 Å. The number of message passing layers was set to 2 and the body-order to 4. The models were trained on total energies and forces with the ScaleShiftMACE model type and swa strategy. A 90:10 train:validation split was employed and the parameters were optimised using the ADAM method. Geometry optimisations of CSP structures using the MACE models were conducted through ASE[14] using the preconLBFGS optimizer and the ExpCellFilter to allow relaxation of the cell parameters. The optimisations were continued until the max atomic force was less than 0.005 eV Å<sup>-1</sup>.

## S1.4 Lattice Energy Correction Dataset

The dataset for training the lattice energy correction consists of crystal structures sampled from the CSP landscapes and the corresponding energy corrections between the FIT+DMA and the B86bPBE+XDM lattice energies. The energy correction was calculated as follows

$$\Delta E_{lattice} = E_{lattice}^{B86bPBE+XDM} - E_{lattice}^{FIT+DMA} \quad (1)$$

Where the B86bPBE+XDM lattice energies are calculated by removing the isolated molecular energy of all N molecules in the unit cell from the total crystal energy,

$$E_{lattice}^{B86bPBE+XDM} = E_{total}^{B86bPBE+XDM} - \sum_{molecule,i}^N E_{molecule,i}^{B86bPBE+XDM} \quad (2)$$

In all cases the B86bPBE+XDM calculations were conducted using the FHI-aims code[15–17] with a tight basis set of numeric atom-centred orbitals and total energy and force convergence criteria of 10<sup>-6</sup> eV and 10<sup>-4</sup> eV/Å, respectively. For the total energy calculations of crystal structures a k-point grid with spacing of 0.05 Å<sup>-1</sup> was used.

The initial dataset was created by randomly sampling 10 structures from each CSP landscape with relative energy less than 8.0 kJ mol<sup>-1</sup>. In cases where 10 structures could not be sampled (due to there being less than 10 structures with relative energies less than 8.0 kJ mol<sup>-1</sup>), all the low energy structures were selected. As stated in the main text this initial dataset was partitioned into a training set, an in-domain test set, and an extrapolation test set. The training and test set contained structures for 891

compounds while the extrapolation set contained all the sampled structures for 143 compounds. It should be noted that the datasets for the ML potential contains 23 compounds not present in the CSP results. This is because these were molecules selected for which the known crystal structures could not have been matched given our CSP assumptions (limits on space group and  $Z'$ ); we include them in NNP training as their landscapes represent plausible  $Z'=1$  structures of molecules observed to crystallise in the CSD that satisfy our other chemical criteria.

An initial committee of 8 NNPs was trained, and thereafter, we performed two iterations of active learning on the remaining low energy structures of the training compounds. This involved selecting the 500 highest uncertainty structures at each iteration and adding them to the training dataset before retraining the model to update the uncertainties. Using query-by-committee, the uncertainties were estimated as the standard deviation of the energy predictions of the 8 NNPs. Notably, we converted the energies and the standard deviations to units of  $\text{kJ mol}^{-1} \sqrt{N}^{-1}$  where  $N$  is the number of atoms in the structure. This accounts for difference in the size of the molecules, which is not accounted for by the conventional units of  $\text{kJ mol}^{-1}$  (per molecule). Overall the two iterations of active learning resulted in an additional 1000 structures being added to the training set. The active learning was terminated after two iterations since we found that the improvement to the errors on the test and extrapolation sets was small and thus likely no longer affected the re-ranking of structures significantly.

To assess whether the energy cutoff was limiting the model, we conducted a third iteration of active learning across all remaining candidates of the training compounds (i.e. without a relative energy cutoff). However, this did not offer much improvement and even slightly reduced performance on the lowest energy structures. Consequently, the second iteration model was used in the reported results. The learning curves over the active learning iterations is presented in Figure S1.

The MACE re-optimised CSP landscapes and the MACE model itself are available from DOI: 10.5258/SOTON/D3094.

## S1.5 PBE+D3 Total Energy Dataset

The dataset for training MACE models used in unconstrained geometry optimisations was derived from the entire lattice energy correction dataset. Specifically, the atom coordinates of 11,325 structures were randomly perturbed to generate structures with greater conformational diversity. The perturbations were conducted through the ASE python package[14] using a standard deviation of 0.03 Å. The resulting structures were then evaluated with DFT using the PBE exchange-correlation functional and D3(BJ)[18] dispersion correction (PBE+D3) as implemented in VASP[19–22]. For all calculations, a 600 eV cutoff was set on the planewave basis set and a maximum k-point spacing of  $0.05 \text{ \AA}^{-1}$  was used.

While models trained solely on rattled CSP structures are robust for unconstrained geometry optimisations, we have observed that the predicted relative energies can have high errors. Training a second iteration model with a dataset augmented by structures optimised with the first iteration model can reduce these errors significantly. Hence, we applied this here, randomly selecting 5 CSP structures per compound with relative energies less than  $8.0 \text{ kJ mol}^{-1}$  and optimising them with an initial MACE model trained on the dataset of only rattled structures. Energies and forces were evaluated for these optimised structures with the same PBE+D3 method and combined with the previous dataset. This procedure resulted in the second iteration dataset containing 16,271 structures. The second iteration MACE model trained on this dataset was used in to perform the reported unconstrained geometry optimisations.

## S2 Results

### S2.1 Learning Curves of $\Delta$ -ML Lattice Energy Correction

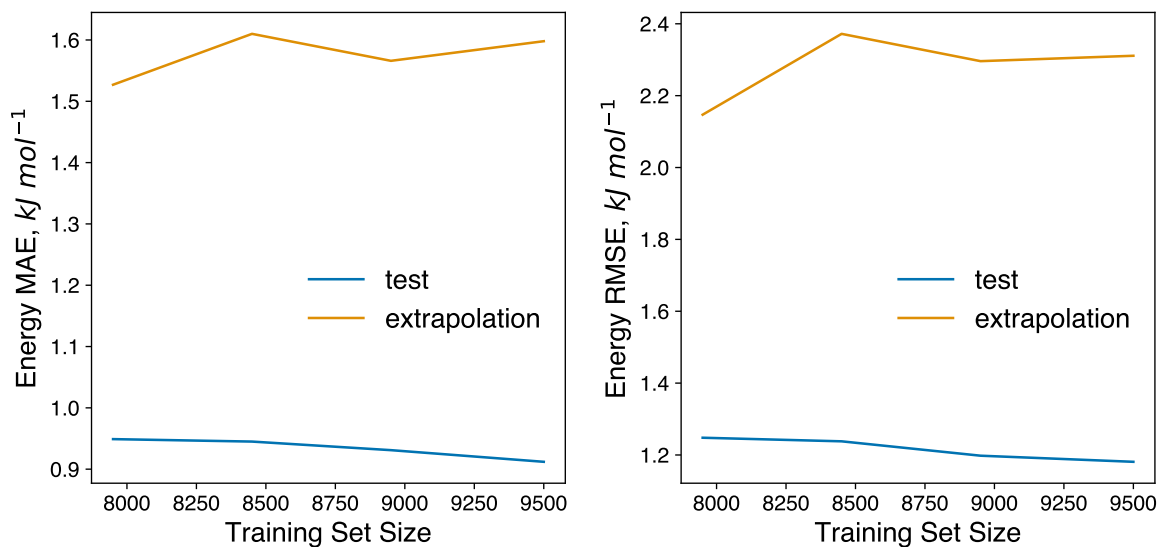

Figure S1: The MAE (left) and RMSE (right) learning curves for the FIT+DMA+ $\Delta$ -ML model on the (in-domain) test and extrapolation sets. Includes the initial random sampling iteration and 3 iterations of active learning.

### S2.2 Compound Distribution in Training Dataset

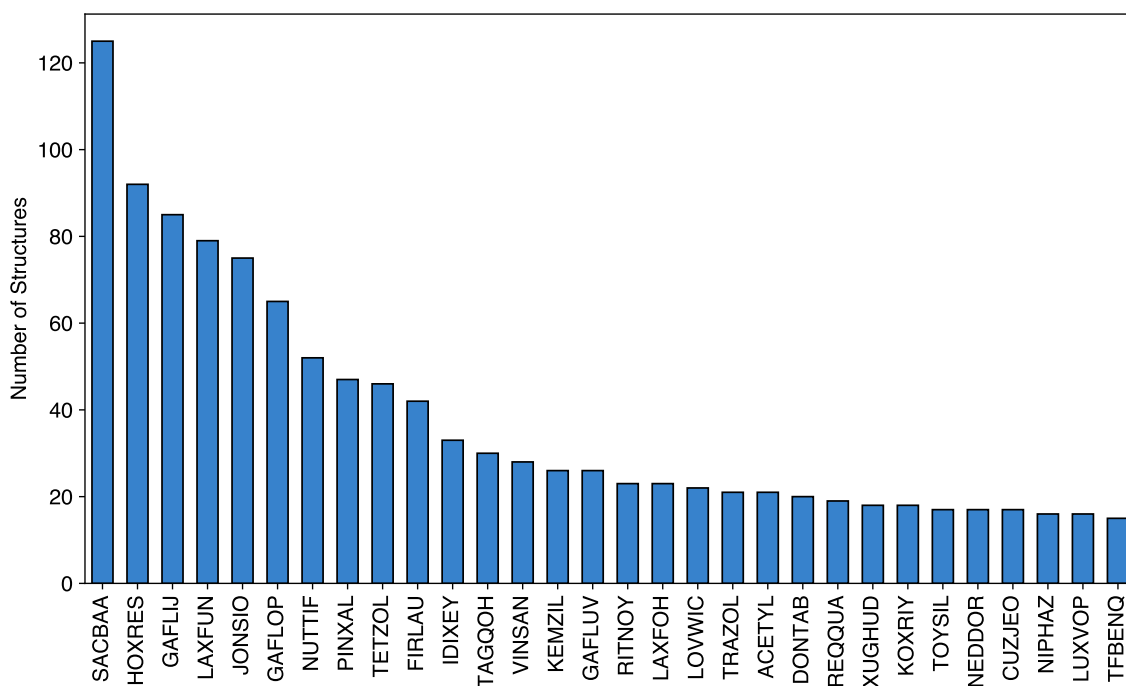

Figure S2: The number of structures for the 30 most prominent compounds in the training set following the initial sampling and two iterations of active learning (8950 total structures). Notably 4 out of the top 5 are compounds containing fluorine functional groups.

## S2.3 Lattice Energy Errors

### FIT+DMA

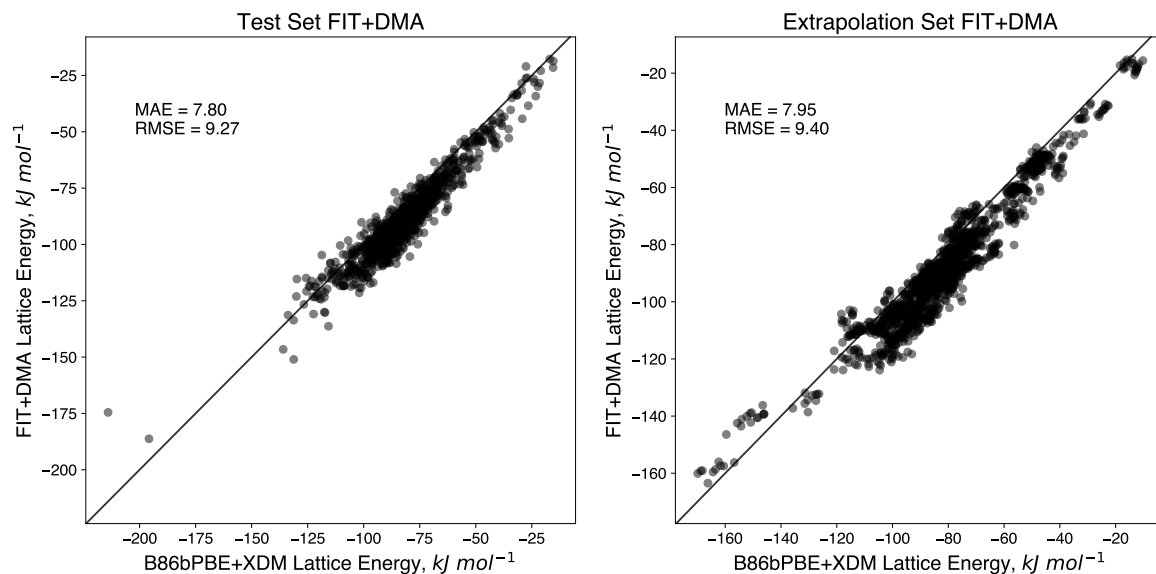

Figure S3: Lattice energy errors of FIT+DMA for the test (left) and extrapolation (right) sets relative to B86bPBE+XDM lattice energies.

### FIT+DMA+ $\Delta$ -ML

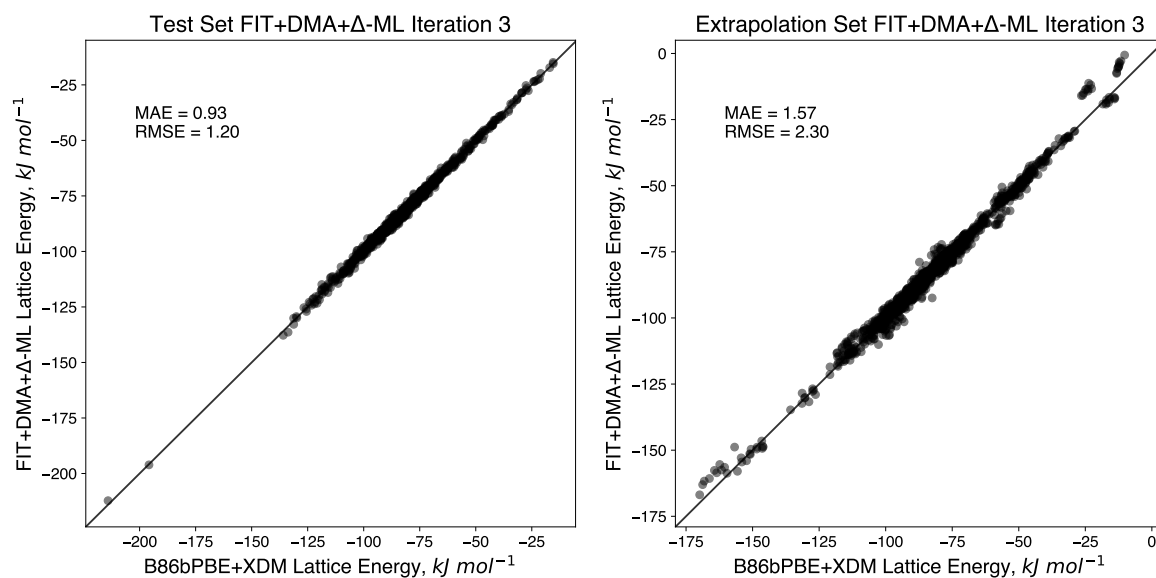

Figure S4: Lattice energy errors of FIT+DMA+ $\Delta$ -ML (iteration 3) for the test (left) and extrapolation (right) sets relative to B86bPBE+XDM lattice energies.



## S2.4 $\Delta$ -ML Lattice Energy Corrected Experimental Structure Ranking

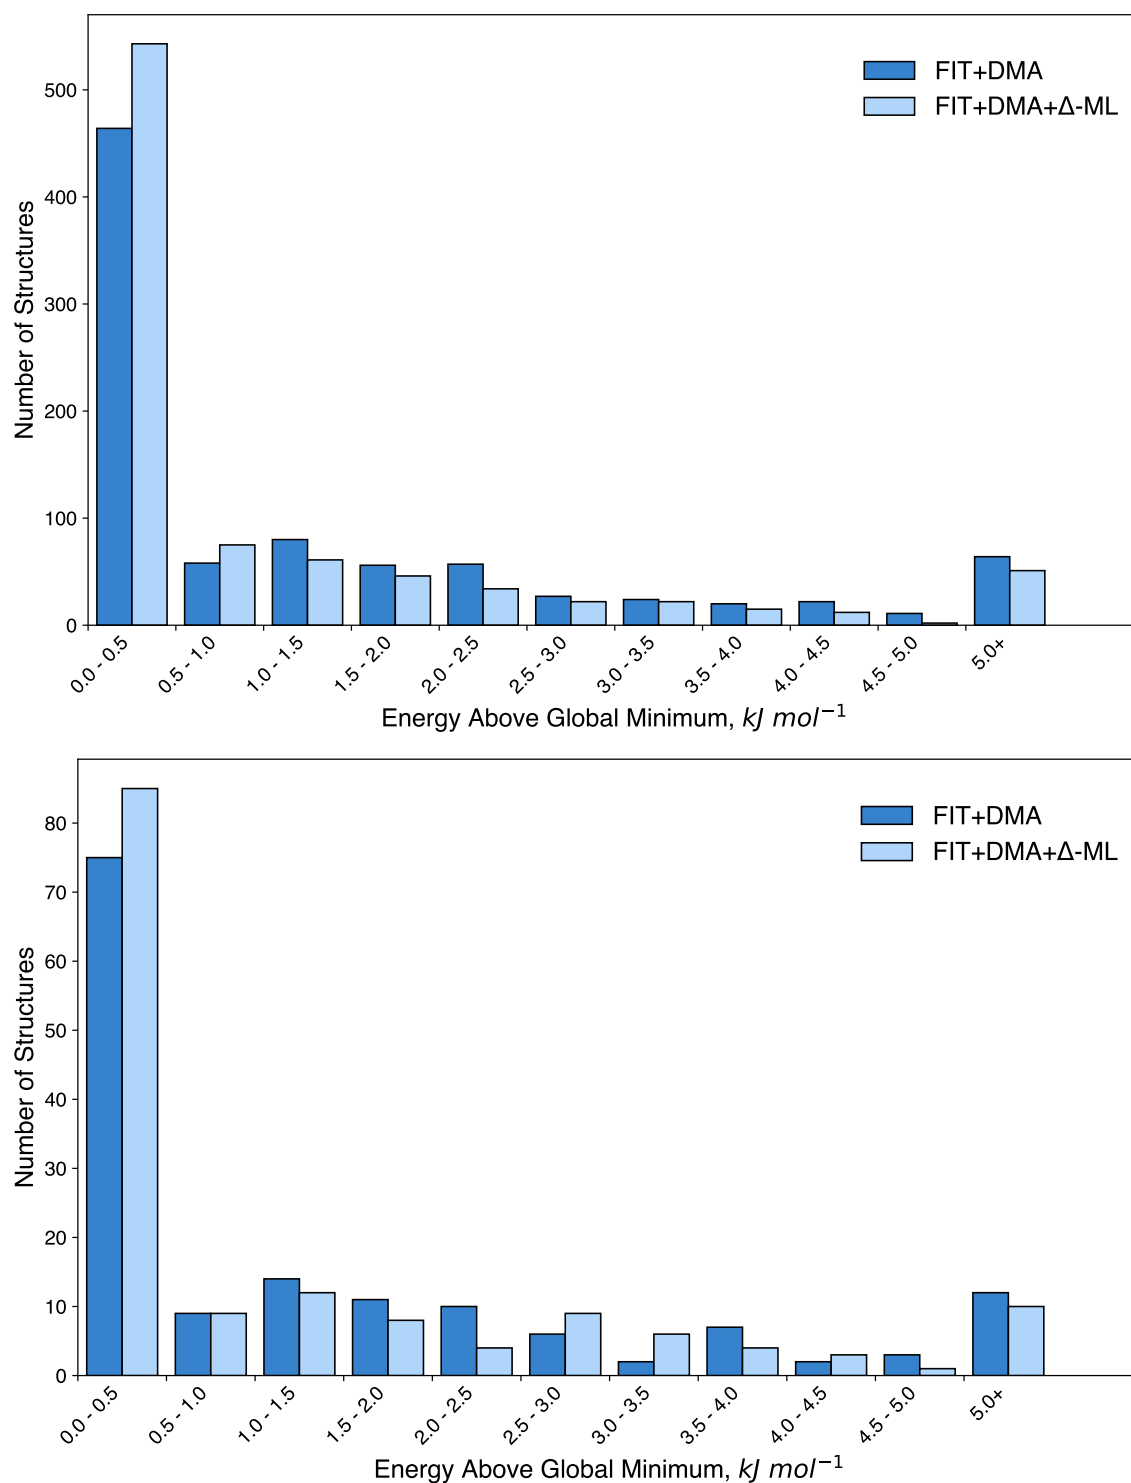

Figure S5: Distribution of the experimental structures with the two energy models in terms of energies above the global minimum for the training compounds (above) and extrapolation compounds (below).

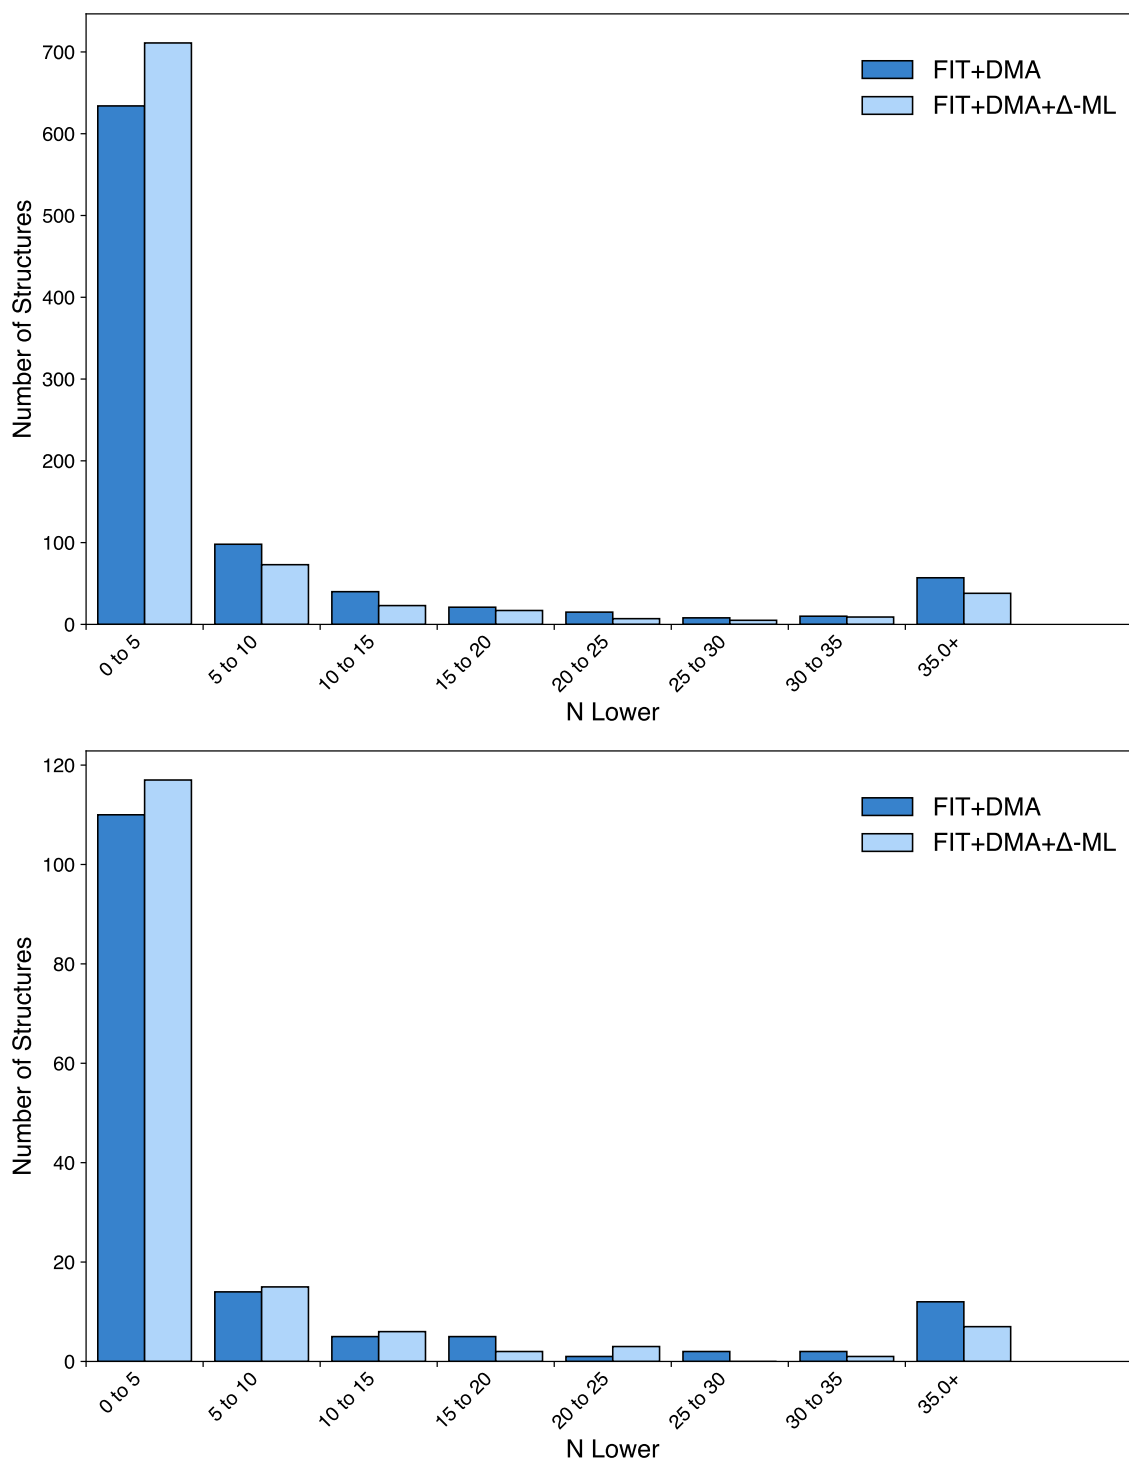

Figure S6: Distribution of the experimental structures with the two energy models in terms of the number of lower ranked structures (N lower) for the training compounds (above) and extrapolation compounds (below).

### S3 Molecular Data

Table S3 (presented at end of document for legibility) is the complete list of CSD refcodes for which matches were sought on our CSP energy landscapes, totalling 1041 distinct crystal structures of 1007 unique molecular species. All entries have a SMILES string (generated using the CSD's ConQuest

software) except for 3 systems containing delocalised bonds for which a conventional SMILES string could not be produced: BDEHAN10, DONTAB, and KOYLIT. The 6 entries which were not located on our CSP landscapes (i.e. for which no match to experiment was found) are denoted with energy ranks, RMSD<sub>30</sub> values, and numerical ranks of "None".

This data is also available in a structured, machine-readable format (CSV file) alongside the optimised crystal structures (as concatenated CIF files) and lattice energy rankings for each landscape (CSV files) from DOI: 10.5258/SOTON/D3094.

## References

- (1) Case, D. H.; Campbell, J. E.; Bygrave, P. J.; Day, G. M. *Journal of chemical theory and computation* **2016**, *12*, 910–924.
- (2) Coombes, D. S.; Price, S. L.; Willock, D. J.; Leslie, M. *The Journal of Physical Chemistry* **1996**, *100*, 7352–7360.
- (3) Price, S. L.; Leslie, M.; Welch, G. W. A.; Habgood, M.; Price, L. S.; Karamertzanis, P. G.; Day, G. M. *Phys. Chem. Chem. Phys.* **2010**, *12*, 8478–8490.
- (4) Williams, D. E.; Houpt, D. J. *Acta Crystallographica Section B* **1986**, *42*, 286–295.
- (5) Holden, J. R.; Du, Z.; Ammon, H. L. *Journal of Computational Chemistry* **1993**, *14*, eprint: <https://onlinelibrary.wiley.com/doi/pdf/10.1002/jcc.540140406>, 422–437.
- (6) Spek, A. L. *Acta Cryst. Sect. D* **2009**, *65*, 148–155.
- (7) Cui, P.; McMahon, D. P.; Spackman, P. R.; Alston, B. M.; Little, M. A.; Day, G. M.; Cooper, A. I. *Chemical Science* **2019**, *10*, Publisher: The Royal Society of Chemistry, 9988–9997.
- (8) Chisholm, J. A.; Motherwell, S. *J. Appl. Crystallogr.* **2005**, *38*, 228–231.
- (9) Singraber, A.; Morawietz, T.; Behler, J.; Dellago, C. *Journal of Chemical Theory and Computation* **2019**, *15*, 3075–3092.
- (10) Singraber, A.; Behler, J.; Dellago, C. *Journal of Chemical Theory and Computation* **2019**, *15*, 1827–1840.
- (11) Behler, J. *The Journal of Chemical Physics* **2011**, *134*, 074106.
- (12) Gastegger, M.; Schwiedrzik, L.; Bittermann, M.; Berzsényi, F.; Marquetand, P. *The Journal of Chemical Physics* **2018**, *148*, 241709.
- (13) Batatia, I.; Kovacs, D. P.; Simm, G.; Ortner, C.; Csanyi, G. *Advances in Neural Information Processing Systems* **2022**, *35*, 11423–11436.
- (14) Larsen, A. H.; Mortensen, J. J.; Blomqvist, J.; Castelli, I. E.; Christensen, R.; Dulak, M.; Friis, J.; Groves, M. N.; Hammer, B.; Hargus, C., et al. *Journal of Physics: Condensed Matter* **2017**, *29*, 273002.
- (15) Blum, V.; Gehrke, R.; Hanke, F.; Havu, P.; Havu, V.; Ren, X.; Reuter, K.; Scheffler, M. *Computer Physics Communications* **2009**, *180*, 2175–2196.
- (16) Havu, V.; Blum, V.; Havu, P.; Scheffler, M. *Journal of Computational Physics* **2009**, *228*, 8367–8379.
- (17) Marek, A.; Blum, V.; Johanni, R.; Havu, V.; Lang, B.; Auckenthaler, T.; Heinecke, A.; Bungartz, H.-J.; Lederer, H. *Journal of Physics: Condensed Matter* **2014**, *26*, 213201.
- (18) Grimme, S.; Ehrlich, S.; Goerigk, L. *Journal of computational chemistry* **2011**, *32*, 1456–1465.
- (19) Kresse, G.; Hafner, J. *Physical review B* **1993**, *47*, 558.
- (20) Kresse, G.; Furthmüller, J. *Computational materials science* **1996**, *6*, 15–50.
- (21) Kresse, G.; Furthmüller, J. *Physical review B* **1996**, *54*, 11169.
- (22) Kresse, G.; Joubert, D. *Physical review b* **1999**, *59*, 1758.

Table S3: The complete list of all crystal structures of molecules for which our CSP workflow was attempted. The numerical ranking indicates the number of predicted structures lower in energy than the experimental match to this refcode, i.e. 0 indicates the match is the global minimum on the energy landscape.

| CSD Refcode | Formula       | Space Group symbol | Space Group number | SMILES                                       | Energy rank $\Delta E(\text{CSP})$ / kJ/mol | RMSD <sub>30</sub> of CSP match / Å | Numerical rank |
|-------------|---------------|--------------------|--------------------|----------------------------------------------|---------------------------------------------|-------------------------------------|----------------|
| ABUDAD      | C13 H23 N1 O1 | P21/c              | 14                 | O=C1NC2CCCCCCCCC12                           | 0.04                                        | 0.129                               | 1              |
| ABUDAD01    | C13 H23 N1 O1 | P21/c              | 14                 | O=C1NC2CCCCCCCCC12                           | 0.00                                        | 0.216                               | 0              |
| ACNAQU01    | C12 H6 O2     | P212121            | 19                 | O=C1C(=O)c2cccc3cccc1c23                     | 0.00                                        | 0.211                               | 0              |
| ACRDIN04    | C13 H9 N1     | P21/n              | 14                 | c1ccc2nc3cccc3cc2c1                          | 0.25                                        | 0.541                               | 1              |
| ACRDIN12    | C13 H9 N1     | P21/n              | 14                 | c1ccc2nc3cccc3cc2c1                          | 0.00                                        | 0.144                               | 0              |
| ADAMAN02    | C10 H16       | P-421c             | 114                | C1C2CC3CC1CC(C2)C3                           | 0.00                                        | 0.234                               | 0              |
| ADAREE      | C6 H6 F6      | Pna21              | 33                 | FC1C(F)C(F)C(F)C(F)C1F                       | 0.00                                        | 0.285                               | 0              |
| ADMNTB03    | C10 H14 O1    | Cmc21              | 36                 | O=C1C2CC3CC(C2)CC1C3                         | 0.00                                        | 0.195                               | 0              |
| ADPRLA      | C8 H7 N5 O1   | Pbca               | 61                 | O=C1CCN2C=Nc3ncnc(N1)c23                     | 1.30                                        | 0.217                               | 2              |
| AFUNEV      | C10 H11 N1 O3 | P21/c              | 14                 | O=C1CC2CC1C1C2C(=O)NC1=O                     | 0.17                                        | 0.363                               | 1              |
| ALOPUR      | C5 H4 N4 O1   | P21/c              | 14                 | O=C1NC=NC2=C1C=NN2                           | 0.12                                        | 0.210                               | 1              |
| ANNULE01    | C16 H16       | P21/c              | 14                 | C1=CC=CC=CC=CC=CC=CC=CC=C1                   | 0.70                                        | 0.313                               | 2              |
| ANONIN11    | C10 H8 O4     | Pbca               | 61                 | O=C1OC2(CCC32OC(=O)C=C3)C=C1                 | 0.00                                        | 0.249                               | 0              |
| ANTCEN      | C14 H10       | P21/a              | 14                 | c1ccc2cc3cccc3cc2c1                          | 0.00                                        | 0.167                               | 0              |
| ANTQUO13    | C14 H8 O2     | P21/c              | 14                 | O=C1c2cccc2C(=O)c2cccc12                     | 0.06                                        | 0.289                               | 1              |
| APUHOJ      | C10 H14 N2 O2 | P212121            | 19                 | O=C1C2CCCN2C(=O)C2CCCN12                     | 0.00                                        | 0.440                               | 0              |
| APYFEB01    | C4 H8 N2 O1   | Pnma               | 62                 | O=C1NCCCN1                                   | 0.00                                        | 0.189                               | 0              |
| ATCDEO      | C10 H12 O2    | Pbca               | 61                 | O=C1CC2C(C1)C1CC(=O)CC21                     | 7.26                                        | 0.341                               | 118            |
| ATIBAH      | C8 H10 N2 O3  | P212121            | 19                 | O=C1CC2NC(=O)N3CCC(O1)C23                    | 1.69                                        | 0.967                               | 1              |
| AWUSAO      | C10 H14 O4    | P21/c              | 14                 | O=C1CCCC2(CC3OCCCC3O2)O1                     | 0.35                                        | 0.215                               | 1              |
| AWUWOE      | C9 H15 N1 O1  | C2/c               | 15                 | O=C1CC2(CCCCC2)CN1                           | 0.34                                        | 0.195                               | 1              |
| AXALER      | C10 H9 N1 O3  | P21/n              | 14                 | O=C1CCC2N1CC1=C(OC=C1)C2=O                   | 5.86                                        | 0.444                               | 6              |
| AZAKIW      | C10 H9 N1 O1  | Pbca               | 61                 | O=C1Nc2cccc2C21CC2                           | 0.51                                        | 0.247                               | 1              |
| AZALAO      | C10 H12 O3    | Pca21              | 29                 | O=C1COC2OCC3C=CCC1C23                        | 0.40                                        | 0.247                               | 1              |
| AZCYHO      | C6 N4 O4      | P21/a              | 14                 | O=C1C(=O)C(=[N+]=[N-])C(=O)C(=O)C1=[N+]=[N-] | 0.00                                        | 0.260                               | 0              |
| AZPACN      | C12 H8 N2     | P21/n              | 14                 | C1=CC2=CC=C3C=CC4=CC=C1N2N34                 | 0.00                                        | 0.308                               | 0              |
| AZPNOD      | C7 H10 N2 O2  | P212121            | 19                 | O=C1CCC2(CCC(=O)N2)N1                        | 7.10                                        | 0.255                               | 10             |

Table S3 (continued)

| CSD Refcode | Formula       | Space Group symbol | Space Group number | SMILES                          | Energy rank $\Delta E(\text{CSP})$ / kJ/mol | RMSD <sub>30</sub> of CSP match / Å | Numerical rank |
|-------------|---------------|--------------------|--------------------|---------------------------------|---------------------------------------------|-------------------------------------|----------------|
| AZTCDO10    | C9 H13 N1 O1  | P21/n              | 14                 | O=C1NC2CC3CCC2CC13              | 0.00                                        | 0.201                               | 0              |
| AZURAC01    | C3 H3 N3 O2   | P212121            | 19                 | O=C1NN=CC(=O)N1                 | 0.48                                        | 0.156                               | 5              |
| BACKEY      | C4 H4 N2      | Pmnn               | 58                 | c1cncnc1                        | 0.00                                        | 0.255                               | 0              |
| BAGKEB      | C9 H8 O1      | P21/c              | 14                 | C1C2OC2c2ccccc12                | 0.00                                        | 0.152                               | 0              |
| BAPFEF      | C6 H7 F1 O3   | P212121            | 19                 | FC1OC2COC1C1OC21                | 0.83                                        | 0.264                               | 2              |
| BAPFIJ      | C6 H7 F1 O3   | P212121            | 19                 | FC1OC2COC1C1OC21                | 3.54                                        | 0.283                               | 6              |
| BAPFOP      | C6 H7 F1 O3   | P21                | 4                  | FC1OC2COC1C1OC21                | 0.00                                        | 0.196                               | 0              |
| BAPFUV      | C6 H7 F1 O3   | P212121            | 19                 | FC1OC2OC1C1OC21                 | 0.91                                        | 0.228                               | 2              |
| BAPGAC      | C6 H7 F1 O3   | P212121            | 19                 | FC1C2COC(O2)C2OC12              | 0.89                                        | 0.230                               | 2              |
| BAPGEG      | C6 H7 F1 O3   | P212121            | 19                 | FC1C2COC(O2)C2OC12              | 0.00                                        | 0.217                               | 0              |
| BAPGIK      | C6 H7 F1 O3   | P1                 | 1                  | FC1C2OC1C1OCC2O1                | 0.97                                        | 0.231                               | 3              |
| BAPGOQ      | C6 H7 F1 O3   | P212121            | 19                 | FC1OC2OCC1C1OC21                | 0.00                                        | 0.181                               | 0              |
| BARBAC01    | C4 H4 N2 O3   | P21/c              | 14                 | O=C1CC(=O)NC(=O)N1              | 3.50                                        | 0.313                               | 17             |
| BASCON      | C16 H12       | P21/n              | 14                 | c1ccc2C=Cc3ccccc3C=Cc2c1        | 0.96                                        | 0.273                               | 1              |
| BASDOO      | C12 H16 O3    | P21/n              | 14                 | O=C1CCCCC(O1)=C1CCCCC1=O        | 0.00                                        | 0.174                               | 0              |
| BATVOH      | C10 H20       | P21/n              | 14                 | C1CCCCCCCCC1                    | 0.03                                        | 0.223                               | 1              |
| BAWVUQ01    | C6 H12 N4 O4  | P-1                | 2                  | C1OOCN2CN1N1COOCN2C1            | 1.73                                        | 0.593                               | 1              |
| BAYHOB      | C12 H7 N1 O2  | P21/c              | 14                 | O=C1NC(=O)c2c1ccc1ccccc21       | 1.42                                        | 0.222                               | 2              |
| BAYROI      | C10 H10 O2    | P21/n              | 14                 | O=C1OCCCC21C=CC=CC=C2           | 0.00                                        | 0.117                               | 0              |
| BAZOCT      | C10 H12 N2    | P21/n              | 14                 | C1CN2CC1Nc1ccccc21              | 0.26                                        | 0.177                               | 1              |
| BAZYAC01    | C10 H9 N1 O4  | P21/c              | 14                 | N1C23C4OC4OC4C12C1OC1C1OC31     | 0.00                                        | 0.492                               | 0              |
| BCHXEN01    | C12 H20       | P-1                | 2                  | C1CCC(CCC1)=C1CCCCC1            | 0.36                                        | 0.257                               | 2              |
| BCOCHY      | C10 H14 N2 O2 | C2/m               | 12                 | O=C1NC(=O)C2(CC3CCCC3C2)N1      | 1.15                                        | 0.312                               | 2              |
| BCODYN02    | C16 H8        | P21/n              | 14                 | c1ccc2C#Cc3ccccc3C#Cc2c1        | 0.00                                        | 0.574                               | 0              |
| BCYBUE01    | C10 H10       | P-1                | 2                  | C1Cc2cc3CCc3cc12                | 0.00                                        | 0.275                               | 0              |
| BDEHAN10    | C14 H10       | P21/c              | 14                 |                                 | 0.00                                        | 0.157                               | 0              |
| BEBOXV      | C9 H6 N4      | P21/n              | 14                 | C1=CC=C2N3N=CN=C3N=C2C=C1       | 1.57                                        | 0.452                               | 2              |
| BEJPEL      | C15 H13 N1    | C2/c               | 15                 | C1C2=CC3=CC=CC=C(N3)C=C1C=CC=C2 | 0.00                                        | 0.319                               | 0              |
| BEKLAE      | C8 H12 N2 O2  | P21/n              | 14                 | [O]N1=C2CCCCCCCC2=NO1           | 0.00                                        | 0.091                               | 0              |

Table S3 (continued)

| CSD Refcode | Formula       | Space Group symbol | Space Group number | SMILES                               | Energy rank $\Delta E(\text{CSP})$ / kJ/mol | RMSD <sub>30</sub> of CSP match / Å | Numerical rank |
|-------------|---------------|--------------------|--------------------|--------------------------------------|---------------------------------------------|-------------------------------------|----------------|
| BEKMIN      | C10 H8 N2 O2  | P-1                | 2                  | O=C1ON=C2CCc3cccc3N12                | 0.14                                        | 0.952                               | 1              |
| BEMYEY      | C8 H10 N2 O2  | P212121            | 19                 | O=C1NC2CC=CCC1NC2=O                  | 0.00                                        | 0.549                               | 0              |
| BENZEN      | C6 H6         | Pbca               | 61                 | c1ccccc1                             | 0.00                                        | 0.295                               | 0              |
| BENZEN03    | C6 H6         | P21/c              | 14                 | c1ccccc1                             | 0.49                                        | 0.416                               | 4              |
| BE0XAZ01    | C6 H4 N2 O1   | Pc                 | 7                  | O1N=C2C=CC=CC2=N1                    | 2.61                                        | 0.313                               | 30             |
| BESSUN      | C11 H12 O1    | P212121            | 19                 | O=C1C2=CC=CC=C1CCCC2                 | 2.66                                        | 0.213                               | 2              |
| BEVCEK      | C10 H12 O4    | P32                | 145                | O=C1OC2CC3COC4OCC1C2C34              | 4.17                                        | 0.199                               | 5              |
| BEXGAM      | C7 H8 O3      | P21/a              | 14                 | C1C2OC2C2OC2C2OC12                   | 0.00                                        | 0.164                               | 0              |
| BEZWIM      | C8 H10 O3     | P212121            | 19                 | O=C1OC(=O)C2CCCCC12                  | 4.36                                        | 0.715                               | 12             |
| BEZXUZ      | C13 H16 O2    | P212121            | 19                 | O=C1C2CC3CCC41CCC1CC1C34O2           | 0.00                                        | 0.149                               | 0              |
| BIFXOE      | C11 H14 O3    | P21                | 4                  | O=C1CC2CCC34OC3CCC4C2O1              | 1.12                                        | 0.376                               | 1              |
| BIGWUJ      | C12 H14 O1    | P21/m              | 11                 | O=C1CC23CC=CCC12CC=CC3               | 0.86                                        | 0.196                               | 1              |
| BILLEP      | C11 H12 N2 O2 | P21/c              | 14                 | O=C1C2C3OC(C=C3)C2C2=NCCCN12         | 0.15                                        | 0.228                               | 1              |
| BILZUR      | C9 H12 O2     | P21/n              | 14                 | O=C1CCCC2C3COC12C3                   | 1.88                                        | 0.606                               | 5              |
| BINDEI      | C12 H6 O4     | Cmca               | 64                 | O=C1CC(=O)c2cc3C(=O)CC(=O)c3cc12     | 0.00                                        | 0.300                               | 0              |
| BIRTUR      | C9 H12 O3     | P212121            | 19                 | O=C1CC2(CCCC2)CC(=O)O1               | 6.06                                        | 0.396                               | 88             |
| BISLOE      | C7 H6 O3      | P21/c              | 14                 | O=C1OC2C3OC3C2C13                    | 0.32                                        | 0.210                               | 1              |
| BIVZIP01    | C16 H8        | P21/c              | 14                 | C1=CC2=C3C=C3C3=CC=CC3=C3C=C3C2=C1   | 1.38                                        | 1.343                               | 1              |
| BIXKUP      | C12 H12 O3    | P21/n              | 14                 | O=C1c2ccccc2CC21OCCO2                | 16.32                                       | 0.813                               | 299            |
| BIXLOK      | C11 H10 O3    | P21/n              | 14                 | O=C1C2c2ccccc2C21OCCO2               | 4.95                                        | 1.048                               | 29             |
| BIZWIS      | C11 H10 N2 O2 | P21/n              | 14                 | O=C1C(Oc2cccc12)=C1NCCN1             | 7.30                                        | 0.429                               | 17             |
| BMEANN      | C16 H14       | C2/c               | 15                 | C1C2=CC=CC=C1C=C1CC(=C2)C=CC=C1      | 0.48                                        | 0.239                               | 2              |
| BNORSO10    | C14 H12 O2    | P21/c              | 14                 | O=C1C2C3C2C2C4C5C6C(C3C12)C4C(=O)C56 | 2.11                                        | 0.172                               | 4              |
| BNZQUI      | C6 H4 O2      | P21/a              | 14                 | O=C1C=CC(=O)C=C1                     | 3.24                                        | 0.226                               | 23             |
| BNZQUI02    | C6 H4 O2      | P21/a              | 14                 | O=C1C=CC(=O)C=C1                     | 3.24                                        | 0.271                               | 23             |
| BODCOM      | C10 H4 O4     | P21/n              | 14                 | O=C1C=CC(=O)C2=C1C(=O)C=CC2=O        | 4.63                                        | 0.246                               | 4              |
| BOFWEZ      | C11 H15 N1 O2 | P212121            | 19                 | C=C1CCCC2C1C1COC(=O)N1C2             | 2.66                                        | 0.224                               | 3              |
| BOMJIW      | C6 H8 F4      | Pmmm               | 58                 | FC1(F)CC(F)(F)CC1                    | 0.00                                        | 0.180                               | 0              |
| BOPXOT      | C10 H8 O4     | P21/c              | 14                 | O1C2C3OC3C3=C(C12)C1OC1C1OC31        | 2.68                                        | 0.245                               | 2              |

Table S3 (continued)

| CSD Refcode | Formula       | Space Group symbol | Space Group number | SMILES                             | Energy rank $\Delta E(\text{CSP})$ / kJ/mol | RMSD <sub>30</sub> of CSP match / Å | Numerical rank |
|-------------|---------------|--------------------|--------------------|------------------------------------|---------------------------------------------|-------------------------------------|----------------|
| BOQQUT      | C8 H11 N1 O2  | P21/a              | 14                 | O=C1NC(=O)C2C6CC1C2                | 0.88                                        | 0.163                               | 3              |
| BOQQUT03    | C8 H11 N1 O2  | P21/c              | 14                 | O=C1NC(=O)C2C6CC1C2                | 0.88                                        | 0.345                               | 3              |
| BOSLAX      | C9 H9 N1 O1   | P212121            | 19                 | O=C1CCc2ccccc2N1                   | 0.00                                        | 0.388                               | 0              |
| BOSNIG      | C13 H14 O3    | Pbca               | 61                 | O=C1OC2C3CC4(C5CCC(C5)C4=C3)C2O1   | 0.00                                        | 0.108                               | 0              |
| BOXAZD      | C8 H5 N1 O3   | P21/a              | 14                 | O=C1NC(=O)c2ccccc2O1               | 0.00                                        | 0.643                               | 0              |
| BOXBEV      | C10 H10 O2    | P21/n              | 14                 | O=C1CC2C3CC1C(C=C3)C2=O            | 0.13                                        | 0.230                               | 1              |
| BOXGEA      | C5 H7 N3      | P212121            | 19                 | C1CN2N=CC=C2N1                     | 0.00                                        | 0.247                               | 0              |
| BUFD0V      | C15 H12 O1    | P-1                | 2                  | O=C1c2ccccc2CCc2ccccc12            | 0.00                                        | 0.264                               | 0              |
| BUGMIZ      | C12 H20 N2 O1 | P21/c              | 14                 | O=C1C2CCCCC2NC2CCCCN12             | 0.22                                        | 0.239                               | 2              |
| BUGTOM      | C10 H11 N3 O1 | P21/n              | 14                 | C1NC=NN2C1COc1ccccc21              | 6.99                                        | 0.331                               | 54             |
| BUHMOH      | C16 H16       | P212121            | 19                 | C1=CC2C(C=C1)C1C2C2C=CC3C(C=C2)C13 | 0.00                                        | 0.271                               | 0              |
| BUKLOK      | C12 H14 O3    | P21/c              | 14                 | O=C1OC2CCCCC34OC3CC=C1C24          | 0.00                                        | 0.259                               | 0              |
| BUKTAC      | C16 H14       | Pna21              | 33                 | C1=CC=C2C=CC3=CC=CC=C2C=C1         | 3.12                                        | 0.208                               | 30             |
| BUKYUB      | C15 H13 N1    | P21/c              | 14                 | C1C2=CC=CC=C1C=C1CC(=C2)C=CC=N1    | 0.18                                        | 0.153                               | 1              |
| BUNSIM11    | C6 H12 O1     | C2/c               | 15                 | C1CCCCC1                           | 0.00                                        | 0.206                               | 0              |
| BUSFUQ      | C2 H4 N4      | Pca21              | 29                 | N1C=NNC=N1                         | 4.67                                        | 0.680                               | 3              |
| BUTFUT      | C9 H12 O4     | P212121            | 19                 | O=C1CC2C3CCOC3OC2O1                | 0.70                                        | 0.440                               | 2              |
| BUTGAA      | C8 H10 O4     | P21                | 4                  | O=C1CC2C3CCOC3OC2O1                | 0.00                                        | 0.218                               | 0              |
| BUVBUR      | C7 H5 N1 O1   | C2/c               | 15                 | O=C1C=CC2=CC=CN12                  | 1.06                                        | 0.320                               | 11             |
| BUVCIF      | C7 H7 N1 O1   | P21/a              | 14                 | O=C1CCC2=CC=CN12                   | 1.41                                        | 0.270                               | 3              |
| BUVGAC      | C10 H8 N2 O2  | P21                | 4                  | O=C1NC(=O)C2C1Nc1ccccc21           | None                                        | None                                | None           |
| BUXQAO      | C14 H16 O1    | P21/n              | 14                 | C1CCC2C(C3OC3C1)c1ccccc21          | 2.59                                        | 0.451                               | 10             |
| BUYUYUP     | C12 H10       | P21/n              | 14                 | C1=CC=Cc2ccccc2C=C1                | 0.00                                        | 0.302                               | 0              |
| BZAZPO      | C14 H11 N1    | Pnma               | 62                 | N1c2ccccc2C=Cc2ccccc12             | 0.00                                        | 0.201                               | 0              |
| BZCBUO      | C8 H4 O2      | Pbc21              | 29                 | O=C1C(=O)c2ccccc12                 | 0.00                                        | 0.134                               | 0              |
| BZCOCT      | C16 H12       | P21/c              | 14                 | c1ccc2c3c(C4C3c3ccccc43)c2c1       | 4.36                                        | 0.235                               | 34             |
| BZCYDY01    | C14 H12       | P41212             | 92                 | C1CCC#Cc2ccccc2C#CC1               | 0.00                                        | 0.166                               | 0              |
| BZDIOX02    | C12 H8 O2     | C2/c               | 15                 | O1c2ccccc2Oe2ccccc12               | 0.08                                        | 0.093                               | 1              |
| BZDMAZ      | C7 H6 N2      | P21nb              | 33                 | N1C=Nc2ccccc12                     | 6.87                                        | 0.317                               | 42             |



Table S3 (continued)

| CSD Refcode | Formula         | Space Group symbol | Space Group number | SMILES                         | Energy rank $\Delta E(\text{CSP})$ / kJ/mol | RMSD <sub>30</sub> of CSP match / Å | Numerical rank |
|-------------|-----------------|--------------------|--------------------|--------------------------------|---------------------------------------------|-------------------------------------|----------------|
| BZDMAZ03    | C7 H6 N2        | Pccn               | 56                 | N1C=Nc2ccccc12                 | 1.93                                        | 0.167                               | 5              |
| BZOXAZ      | C8 H5 N1 O3     | P21/a              | 14                 | O=C1Nc2ccccc2C(=O)O1           | 0.00                                        | 0.239                               | 0              |
| BZOXZO01    | C7 H5 N1 O2     | P212121            | 19                 | O=C1Nc2ccccc2O1                | 3.69                                        | 1.129                               | 6              |
| BZTROP11    | C11 H8 O1       | P21/n              | 14                 | O=C1C=Cc2ccccc2C=C1            | 1.44                                        | 0.363                               | 1              |
| BZTRZO      | C7 H5 N3 O1     | P212121            | 19                 | O=C1NN=Nc2ccccc12              | 4.93                                        | 0.180                               | 20             |
| CACRED      | C13 H10 F2      | P212121            | 19                 | FC1(F)C2=CC=CC=CC1=CC=CC=C2    | 3.55                                        | 0.487                               | 39             |
| CAGKUQ      | C16 H12         | Pbca               | 61                 | C1=Cc2ccccc2c2ccccc2C=C1       | 0.17                                        | 0.135                               | 1              |
| CAJDIC      | C10 H10 O2      | P212121            | 19                 | O=C1C=CC2CC3=CCCC13O2          | 0.00                                        | 0.193                               | 0              |
| CAMWUI      | C11 H12 O4      | P41                | 76                 | O=C1C2OCC(O2)C2C3CC(C4OC34)C12 | 1.21                                        | 0.264                               | 2              |
| CANPAL      | C12 H7 F2 N1 O1 | P21/n              | 14                 | FC1(F)C(=O)Nc2ccc3ccccc3c12    | 5.97                                        | 0.409                               | 50             |
| CAPRYL      | C8 H15 N1 O1    | Cc                 | 9                  | O=C1CCCCCCCCN1                 | 0.00                                        | 0.216                               | 0              |
| CARPOA      | C13 H10 O1      | P212121            | 19                 | O=C1C=CC=Cc2ccccc2C=C1         | 2.29                                        | 0.347                               | 2              |
| CARYUQ      | C9 H6 F1 N1 O1  | P21/c              | 14                 | Fc1ccc2C(=O)C=Cc1c2            | 0.00                                        | 0.250                               | 0              |
| CAWDUZ      | C14 H10 O2      | Pbca               | 61                 | O1C2C=CC1c1cc3C4OC(C=C4)c3cc21 | 0.00                                        | 0.233                               | 0              |
| CAWDUZ01    | C14 H10 O2      | P21/c              | 14                 | O1C2C=CC1c1cc3C4OC(C=C4)c3cc21 | 0.20                                        | 0.899                               | 1              |
| CAXNUL06    | C10 H4 F4       | P21/n              | 14                 | Fc1c(F)c(F)c2ccccc2c1F         | 1.25                                        | 0.318                               | 1              |
| CAXPAT      | C9 H4 F3 N1     | Pc                 | 7                  | Fc1nc(F)c2ccccc2c1F            | 3.81                                        | 0.160                               | 11             |
| CAXPUN      | C9 H5 F1 O2     | Pc                 | 7                  | Fc1cccc2C=CC(=O)Oc12           | 2.36                                        | 0.899                               | 16             |
| CAXQAU      | C9 H4 F2 O2     | P21/c              | 14                 | Fc1ccc2OC(=O)C=Cc2c1F          | 0.00                                        | 0.140                               | 0              |
| CAXQUO      | C9 H4 F2 O3     | P21/m              | 11                 | FC1(F)C(=O)C=CC2=C1OC(=O)C=C2  | 1.72                                        | 0.166                               | 4              |
| CAZPUQ      | C5 H8 N2 O2     | P21/c              | 14                 | O=C1CCNC(=O)CN1                | 0.06                                        | 0.486                               | 1              |
| CBFBZF      | C14 H10 O2      | P212121            | 19                 | O1C2Oc3ccccc3C2c2ccccc12       | 7.74                                        | 0.532                               | 153            |
| CBFBZF01    | C14 H10 O2      | Cc                 | 9                  | O1C2Oc3ccccc3C2c2ccccc12       | 1.11                                        | 0.184                               | 1              |
| CDBALA      | C6 H10 N2 O2    | C2/c               | 15                 | O=C1CCNC(=O)CCN1               | 5.15                                        | 0.365                               | 11             |
| CDECDO10    | C10 H10 O2      | P-1                | 2                  | O=C1CC=CCC(=O)C=CC=C1          | 0.00                                        | 0.287                               | 0              |
| CEGEX       | C10 H8 O2       | P21                | 4                  | O=C1CCCC(=O)c2ccccc12          | 0.00                                        | 0.346                               | 0              |
| CEDDUK01    | C10 H16 O2      | P21/n              | 14                 | O=C1CCCCC(=O)CCCC1             | 0.00                                        | 0.154                               | 0              |
| CEDSA       | C9 H14 N2 O1    | P21/c              | 14                 | [O-]C1=C2CCCCCCC2=[NH+]N1      | 0.00                                        | 0.527                               | 0              |
| CEHZUK      | C14 H12 O1      | P21/n              | 14                 | C1C2OC(=Cc3ccccc13)C=CC=C2     | 0.18                                        | 0.845                               | 1              |

Table S3 (continued)

| CSD Refcode | Formula        | Space Group symbol | Space Group number | SMILES                                            | Energy rank $\Delta E(\text{CSP})$ / kJ/mol | RMSD <sub>30</sub> of CSP match / Å | Numerical rank |
|-------------|----------------|--------------------|--------------------|---------------------------------------------------|---------------------------------------------|-------------------------------------|----------------|
| CEKWEU      | C14 H18        | P21/c              | 14                 | <chem>C1CCc2cc3CCCCc3cc2C1</chem>                 | 0.00                                        | 0.495                               | 0              |
| CELKOT      | C11 H9 N1      | P-1                | 2                  | <chem>C1Cc2nc3ccccc3cc12</chem>                   | 0.00                                        | 0.230                               | 0              |
| CEMMIT      | C11 H9 N1      | P21/n              | 14                 | <chem>C1N2C=CC=C2c2ccccc12</chem>                 | 0.00                                        | 0.254                               | 0              |
| CENRUJ      | C9 H8 N2 O2    | P21/m              | 11                 | <chem>O=C1CC(=O)Nc2ccccc2N1</chem>                | 0.00                                        | 0.359                               | 0              |
| CEQROI      | C9 H7 N1 O2    | P212121            | 19                 | <chem>O=C1Nc2ccccc2C21CO2</chem>                  | 0.00                                        | 0.152                               | 0              |
| CEYJUN      | C10 H8 N2 O2   | P21/c              | 14                 | <chem>[O]N1=C2CCc3ccccc3C2=NO1</chem>             | 0.00                                        | 0.301                               | 0              |
| C1CSUD      | C12 H7 N1 O2   | P21/n              | 14                 | <chem>O=C1NC(=O)c2cc3ccccc3cc12</chem>            | 0.47                                        | 0.489                               | 2              |
| C1CWEQ      | C14 H10 O2     | P21/a              | 14                 | <chem>O1OC2c3ccccc3C1c1ccccc21</chem>             | 0.34                                        | 0.163                               | 1              |
| C1FSOB      | C11 H14 O2     | P21/c              | 14                 | <chem>O=C1CCCC2CC3CCC(=O)C3C12</chem>             | 0.65                                        | 0.266                               | 1              |
| C1FSUH      | C11 H10 O2     | P21/n              | 14                 | <chem>O=C1C=CC2CC3C=CC(=O)C3C12</chem>            | 1.97                                        | 0.547                               | 4              |
| C1GHEF      | C15 H14 O1     | Pna21              | 33                 | <chem>C1CC2CC1C1=C2C2OC1c1ccccc21</chem>          | 0.00                                        | 0.156                               | 0              |
| C1GKAE      | C12 H16 O3     | P21                | 4                  | <chem>O=C1CCCC3CCCCC2(C1)OC(=O)C3</chem>          | 0.00                                        | 0.171                               | 0              |
| C1JGOR      | C10 H14 O2     | P21/a              | 14                 | <chem>O=C1CCC(=O)C2CCCCC12</chem>                 | 3.69                                        | 0.388                               | 7              |
| C1LWUP11    | C3 H3 N3       | P-1                | 2                  | <chem>c1cnmnc1</chem>                             | 0.49                                        | 0.557                               | 2              |
| C1MHUB      | C14 H24        | P-1                | 2                  | <chem>C1CCC2CC3CCCCC3CC2C1</chem>                 | 0.15                                        | 0.268                               | 1              |
| C1MNUH      | C5 H2 O3       | P41212             | 92                 | <chem>O=C1C=CC(=O)C1=O</chem>                     | 0.00                                        | 0.265                               | 0              |
| C1MYUS      | C12 H16        | C2/c               | 15                 | <chem>C1CC2=C3CCC(=C1CC2)CC3</chem>               | 0.00                                        | 0.137                               | 0              |
| C1PMAP      | C13 H14 O1     | Pn21a              | 33                 | <chem>O=C1C2=CC=CC=C1C1CCC2CC1</chem>             | 0.00                                        | 0.132                               | 0              |
| C1QCEK      | C14 H12        | P21/n              | 14                 | <chem>C1CC#CC#CCCC#CC#CC1</chem>                  | 0.26                                        | 0.373                               | 1              |
| C1QKIJ      | C9 H7 N1 O1    | P21/n              | 14                 | <chem>O=C1NC=Cc2ccccc12</chem>                    | 0.00                                        | 0.434                               | 0              |
| C1VXIO10    | C3 H6 O1       | Pnam               | 62                 | <chem>C1COC1</chem>                               | 0.00                                        | 0.350                               | 0              |
| CLPRPR01    | C10 H14 N2 O2  | P212121            | 19                 | <chem>O=C1C2CCCN2C(=O)C2CCCN12</chem>             | 0.00                                        | 0.450                               | 0              |
| COJMAR      | C6 H3 F1 N2 O2 | P21/n              | 14                 | <chem>FC1=CC=CC2=[N+](=[O-])ON=C12</chem>         | 2.68                                        | 0.265                               | 9              |
| COLDEM      | C16 H10        | P21/n              | 14                 | <chem>C1=CC2=CC3=C4C(=CC(=C24)C=C1)C=CC=C3</chem> | 0.00                                        | 0.416                               | 0              |
| COMFAO      | C12 H13 N1 O1  | P212121            | 19                 | <chem>O=C1CCC2(CCC3ccccc23)N1</chem>              | 2.52                                        | 0.397                               | 3              |
| CONYAH      | C13 H10 O1     | Pnma               | 62                 | <chem>C1c2ccccc2Oe2ccccc12</chem>                 | 0.82                                        | 0.555                               | 1              |
| COQVOW      | C11 H8 N2      | P212121            | 19                 | <chem>N1N=Cc2ccc3ccccc3c12</chem>                 | 0.00                                        | 0.939                               | 0              |
| COUMAR11    | C9 H6 O2       | Pc21b              | 29                 | <chem>O=C1Oc2ccccc2C=C1</chem>                    | 1.02                                        | 0.323                               | 3              |
| COUMAR13    | C9 H6 O2       | P21                | 4                  | <chem>O=C1Oc2ccccc2C=C1</chem>                    | 1.53                                        | 0.281                               | 7              |

Table S3 (continued)

| CSD Refcode | Formula      | Space Group symbol | Space Group number | SMILES                               | Energy rank $\Delta E(\text{CSP})$ / kJ/mol | RMSD <sub>30</sub> of CSP match / Å | Numerical rank |
|-------------|--------------|--------------------|--------------------|--------------------------------------|---------------------------------------------|-------------------------------------|----------------|
| COUMAR18    | C9 H6 O2     | P212121            | 19                 | O=C1Oc2ccccc2C=C1                    | 3.04                                        | 0.273                               | 23             |
| COVGIE      | C12 H12 O2   | P21/n              | 14                 | C1OCC2=C1C=CC1=C(COCC1)C=C2          | 2.06                                        | 0.305                               | 9              |
| CPENAD01    | C5 H6        | P21/c              | 14                 | C1C=CC=C1                            | 0.87                                        | 0.369                               | 11             |
| CPFLUR      | C15 H10      | Pbcn               | 60                 | C1C=C2c3ccccc3c3cccc1e23             | 4.02                                        | 0.201                               | 16             |
| CPYANN      | C17 H12      | C2/c               | 15                 | C1C23C4=CC5=CC=CC=C(C=C2C=CC=C4)C135 | 0.00                                        | 0.135                               | 0              |
| CRBZOL11    | C12 H9 N1    | Pnma               | 62                 | N1c2ccccc2c2ccccc12                  | 0.00                                        | 0.262                               | 0              |
| CUBANE01    | C8 H8        | R-3                | 148                | C12C3C4C1C1C2C3C41                   | 0.00                                        | 0.389                               | 0              |
| CUDJIU01    | C14 H14 O1   | P-421c             | 114                | C1Cc2ccc(CCC3=CC=C1O3)cc2            | 0.00                                        | 0.218                               | 0              |
| CUGBIP      | C8 H6 N2 O2  | P21/c              | 14                 | O=C1C=C(C(O-)[NH+]=C2C=CC=CN12       | 0.62                                        | 0.441                               | 1              |
| CUKCTU      | C4 H8 O2     | P21/n              | 14                 | C1COCCO1                             | 0.00                                        | 0.222                               | 0              |
| CUKCTU01    | C4 H8 O2     | P21/n              | 14                 | C1COCCO1                             | 3.32                                        | 0.235                               | 31             |
| CUMJID      | C8 H12 N2 O2 | P21/n              | 14                 | O=C1CCCCCNC(=O)C2N1                  | 0.00                                        | 0.309                               | 0              |
| CUMJOJ      | C8 H12 N2 O2 | P-421c             | 114                | O=C1CCCCCNC(=O)C2N1                  | 0.00                                        | 0.215                               | 0              |
| CURVES      | C16 H11 N1   | P212121            | 19                 | N1c2ccccc2c1ccc1ccccc21              | 1.71                                        | 0.494                               | 1              |
| CUSHIH10    | C13 H10 O2   | Pccn               | 56                 | O=C1CCOe2ccc3ccccc3c12               | 0.91                                        | 0.300                               | 7              |
| CUWYUP      | C6 H2 F4     | P21/c              | 14                 | Fc1cc(F)c(F)c(F)c1                   | 0.98                                        | 0.282                               | 4              |
| CUXXAW      | C14 H9 N3    | P212121            | 19                 | c1ccc2nc3N4C=CC=C4C=Cc3nc2c1         | 0.00                                        | 0.324                               | 0              |
| CYCHEX      | C6 H12       | C2/c               | 15                 | C1CCCCC1                             | 1.03                                        | 0.771                               | 3              |
| CYDECO      | C10 H18 O1   | P21/c              | 14                 | O=C1CCCCCCCCC1                       | 0.05                                        | 0.259                               | 1              |
| CYHEXO      | C6 H8 O2     | P21                | 4                  | O=C1CCC(=O)CC1                       | 0.71                                        | 0.681                               | 6              |
| CYTDEC      | C14 H28      | P-1                | 2                  | C1CCCCCCCCCCCCC1                     | 1.60                                        | 0.166                               | 6              |
| CYURAC05    | C3 H3 N3 O3  | C2/n               | 15                 | O=C1NC(=O)NC(=O)N1                   | 5.40                                        | 0.296                               | 7              |
| DABLIB      | C8 H8 F4     | Cmca               | 64                 | FC1(F)C2CC3C(CC12)C3(F)F             | 0.00                                        | 0.087                               | 0              |
| DABPIF      | C14 H16      | P21/c              | 14                 | C1C2C3C4C1C1C2C2C5CC(C32)C4C15       | 0.04                                        | 0.091                               | 1              |
| DAFJID      | C11 H8 N2    | P21/n              | 14                 | N1c2ccccc2c2ccccc12                  | 0.00                                        | 0.433                               | 0              |
| DAGSAG      | C14 H24 O1   | P21                | 4                  | O=C1CCCCCCCCCCC=CCC1                 | 0.52                                        | 0.249                               | 2              |
| DAJXOB      | C9 H8 O3     | Pnma               | 62                 | O=C1OC(=O)C2=C1C1CC2C1               | 0.48                                        | 0.383                               | 3              |
| DALBEY      | C8 H10 O3    | P-1                | 2                  | O=C1OCC23OCCC2CC13                   | 0.00                                        | 0.329                               | 0              |
| DALBIC      | C11 H14 O3   | Pbca               | 61                 | O=C1OCC23OC4CCCC4C2CC13              | 1.45                                        | 0.343                               | 4              |

Table S3 (continued)

| CSD Refcode | Formula       | Space Group |        | SMILES                             | Energy rank<br>$\Delta E(\text{CSP})$<br>/ kJ/mol | RMSD <sub>30</sub><br>of CSP match<br>/ Å | Numerical<br>rank |
|-------------|---------------|-------------|--------|------------------------------------|---------------------------------------------------|-------------------------------------------|-------------------|
|             |               | symbol      | number |                                    |                                                   |                                           |                   |
| DANJEH      | C12 H12 O2    | P21/c       | 14     | O=C1C2C3C4C2C2C1CC(C42)C3=O        | 0.00                                              | 0.186                                     | 0                 |
| DATJOA      | C13 H13 N1 O1 | P21/c       | 14     | O=C1C2C3C4C2C2C1CC=C2              | 2.32                                              | 0.191                                     | 7                 |
| DATLER      | C5 H2 F3 N1   | P-1         | 2      | Fc1nc(F)c(F)c1                     | 4.21                                              | 1.135                                     | 179               |
| DATLIV01    | C5 H1 F4 N1   | Pnma        | 62     | Fc1cc(F)c(F)nc1F                   | 0.00                                              | 0.146                                     | 0                 |
| DAVLIV      | C14 H20       | P21/n       | 14     | C1CCC(CCC1)=C=C=C1CCCCC1           | 0.00                                              | 0.154                                     | 0                 |
| DAWSUP01    | C6 H6 N2 O2   | P21/c       | 14     | C=C1NC(=O)C(=O)NC1=O               | 1.08                                              | 0.531                                     | 6                 |
| DAZCOE      | C6 H10 N2     | P21212      | 18     | C1CC2CCC1N=N2                      | 0.00                                              | 0.258                                     | 0                 |
| DAZNAP01    | C8 H6 N2      | Pbca        | 61     | c1ccc2emccc2c1                     | 2.11                                              | 0.525                                     | 16                |
| DAZNAQ      | C8 H6 N2      | P21/n       | 14     | c1cc2ccccc2cn1                     | 3.50                                              | 0.878                                     | 11                |
| DAZNAR      | C8 H6 N2      | P41212      | 92     | c1cnc2ccccc2c1                     | 3.59                                              | 0.158                                     | 26                |
| DAZPNE      | C12 H8 N2     | P21/c       | 14     | c1ccc2c(c1)nnc1ccccc21             | 1.31                                              | 0.170                                     | 1                 |
| DAZVEF      | C12 H12 O3    | P21/c       | 14     | O=C1C2(CC2)C(=O)C2(CC2)C(=O)C21CC2 | 3.58                                              | 0.521                                     | 13                |
| DBOXEP11    | C14 H10 O1    | Pnma        | 62     | O1c2ccccc2C=Cc2ccccc12             | 0.00                                              | 0.136                                     | 0                 |
| DEBFOI      | C12 H11 N1 O1 | P21/n       | 14     | O=C1CCC2=Cc3ccccc3CN12             | 4.18                                              | 1.208                                     | 76                |
| DEBFUO      | C13 H13 N1 O1 | P21/c       | 14     | O=C1CCCC2=Cc3ccccc3CN12            | 2.21                                              | 0.388                                     | 5                 |
| DEPLNA      | C12 H16 O3    | P21/n       | 14     | C1CCC23COC2(C1)C1OC1C1OC31         | 2.73                                              | 0.245                                     | 11                |
| DEPPRD      | C12 H12 O3    | P212121     | 19     | C1OCC23C=CC=CC12C1OC1C1OC31        | 0.00                                              | 0.139                                     | 0                 |
| DEXTIJ      | C11 H8 N2     | P21/n       | 14     | C1c2ccccc2c2nccccc12               | 0.28                                              | 0.273                                     | 1                 |
| DEZDUH      | C8 H6 F6      | Pna21       | 33     | FC1(F)CC2C3CC(F)(F)C2(F)C13F       | 2.43                                              | 0.162                                     | 14                |
| DFNAPH10    | C10 H6 F2     | P21/c       | 14     | Fc1cccc2c(F)cccc12                 | 0.00                                              | 0.209                                     | 0                 |
| DFNAPQ      | C10 H4 F2 O2  | P-1         | 2      | FC1=C(F)C(=O)c2ccccc2C1=O          | 0.00                                              | 0.814                                     | 0                 |
| DHCBAN      | C14 H10       | Pnma        | 62     | c1cc2ccccc3C4C=CC4c(c1)c23         | 0.00                                              | 0.108                                     | 0                 |
| DHPROA      | C10 H10 N2 O2 | P41212      | 92     | O=C1C2C=CCN2C(=O)C2C=CCN12         | 0.00                                              | 0.461                                     | 0                 |
| DHURAC10    | C4 H6 N2 O2   | P21/c       | 14     | O=C1CCNC(=O)N1                     | 0.00                                              | 0.139                                     | 0                 |
| DIAZNP      | C8 H6 N2      | P21/c       | 14     | c1cc2emccc2cn1                     | 1.46                                              | 0.531                                     | 1                 |
| DIHXL10     | C4 H4 N2 O2   | P21/n       | 14     | O1N=CC2ON=CC12                     | 0.00                                              | 0.175                                     | 0                 |
| DIHWUM      | C12 H16 O3    | Pn          | 7      | O=C1C2CCC=CC2OC21CCCCO2            | 1.94                                              | 0.292                                     | 2                 |
| DIJDAE      | C12 H10 O3    | P21/c       | 14     | O=C1COc2ccccc2C2=C1CCO2            | 2.21                                              | 0.273                                     | 2                 |
| DIKETE11    | C4 H4 O2      | P21/c       | 14     | C=C1CC(=O)O1                       | 2.04                                              | 0.207                                     | 10                |

Table S3 (continued)

| CSD Refcode | Formula       | Space Group |        | SMILES                       | Energy rank<br>$\Delta E(\text{CSP})$<br>/ kJ/mol | RMSD <sub>30</sub><br>of CSP match<br>/ Å | Numerical<br>rank |
|-------------|---------------|-------------|--------|------------------------------|---------------------------------------------------|-------------------------------------------|-------------------|
|             |               | symbol      | number |                              |                                                   |                                           |                   |
| DIKPIP03    | C4 H6 N2 O2   | P21/c       | 14     | O=C1CNC(=O)CN1               | 0.00                                              | 0.156                                     | 0                 |
| DILCIK      | C12 H16       | P21/n       | 14     | C1CC2CC1C1=C2C2CCCC1C2       | 0.00                                              | 0.217                                     | 0                 |
| DISBUE      | C6 H7 N1 O3   | P21/c       | 14     | O=C1CCNC(=O)C2OC12           | 2.92                                              | 0.419                                     | 5                 |
| DITBOX      | C14 H12       | P21         | 4      | C1c2cccc2Cc2cccc12           | 0.00                                              | 0.227                                     | 0                 |
| DIUREA04    | C4 H6 N4 O2   | Cmcm        | 63     | O=C1NC2NC(=O)NC2N1           | 0.00                                              | 0.172                                     | 0                 |
| DIXNUT      | C7 H11 N1 O2  | P21/c       | 14     | O=C1NCCC2CCCC2O1             | 3.70                                              | 0.210                                     | 12                |
| DNNEPH10    | C10 H6 N2 O2  | P1121/b     | 14     | O=N1c2cccc3cccc(c23)N1=O     | None                                              | None                                      | None              |
| DOBYOJ      | C7 H9 N1 O3   | P21/c       | 14     | O=C1OCCCC21CCC=[N+][2][O-]   | 1.27                                              | 0.654                                     | 12                |
| DOGPAQ      | C6 H8 N2 O2   | Pn          | 7      | O=C1NCC2C1CNC2=O             | 0.00                                              | 0.203                                     | 0                 |
| DOGTIC      | C7 H10 N2 O2  | P212121     | 19     | O=C1NCC2CC1CNC2=O            | 0.00                                              | 0.127                                     | 0                 |
| DOJTUR      | C8 H11 N1 O2  | P21/n       | 14     | O=C1NC2CC=CCC2CO1            | 0.63                                              | 0.234                                     | 2                 |
| DONTAB      | C7 H10 N2 O2  | P21/n       | 14     |                              | 0.00                                              | 0.266                                     | 0                 |
| DOTRAG      | C11 H8 O4     | P21/c       | 14     | O=C1C(=O)C2(OCCO2)c2cccc12   | 3.68                                              | 0.485                                     | 3                 |
| DSZND010    | C7 H10 N2 O2  | C2/c        | 15     | O=C1NCCC21CCNC2=O            | 0.00                                              | 0.152                                     | 0                 |
| DUBGUC      | C9 H10 O2     | Pnma        | 62     | C1OCc2cccc2CO1               | 1.62                                              | 0.157                                     | 5                 |
| DUBRAT      | C10 H12 N2 O2 | P212121     | 19     | O=C1CCCC(=O)N2C3CCC(C=C3)N12 | 0.00                                              | 0.097                                     | 0                 |
| DUBREX      | C8 H12 N2 O2  | C2/c        | 15     | O=C1CCCC(=O)N2CCCCN12        | 0.00                                              | 0.181                                     | 0                 |
| DUFBOV11    | C2 H4 O1      | P21/n       | 14     | C1CO1                        | 0.71                                              | 0.197                                     | 6                 |
| DUKVOU      | C13 H10 O2    | C2/c        | 15     | O=C1CCOe2c1ccc1cccc21        | 1.60                                              | 0.173                                     | 4                 |
| DUNVEN      | C3 H4 N2 O2   | P21/c       | 14     | O=C1CC(=O)NN1                | 5.63                                              | 0.719                                     | 93                |
| DUTTAN10    | C10 H6 O3     | P21         | 4      | O=C1C2OC2C(=O)c2cccc12       | 0.00                                              | 0.270                                     | 0                 |
| DUXYUQ      | C6 H4 N2 O4   | Cmca        | 64     | O=C1CC(=O)N2N1C(=O)CC2=O     | 4.05                                              | 0.819                                     | 10                |
| DZBASK      | C8 H8 N2      | P21/n       | 14     | N1=NC2C3C4C1C1C2C3C41        | 1.07                                              | 0.402                                     | 7                 |
| DZCDON      | C8 H14 N2 O2  | Pn          | 7      | O=C1CCCC(=O)NCCCCN1          | 0.61                                              | 1.240                                     | 5                 |
| DZHPDO      | C5 H8 N2 O2   | P21/c       | 14     | [O]N1=N([O])C2CCC1C2         | 0.92                                              | 0.309                                     | 3                 |
| DZOCTO      | C6 H10 N2 O1  | P21/n       | 14     | [O-][N+]=NC2CCC1CC2          | 2.87                                              | 0.462                                     | 41                |
| DZSNON      | C7 H10 N2 O2  | P21/c       | 14     | O=C1CCC2(CCN2=O)N1           | 0.92                                              | 0.144                                     | 2                 |
| DZTCDE      | C8 H12 N2     | P21/m       | 11     | C1CC2N=NC1C1CC21             | 1.90                                              | 0.207                                     | 1                 |
| DZX1UN      | C9 H12 N2 O2  | C2/c        | 15     | O=C1CCC23CCC(=O)N2CCN13      | 2.35                                              | 0.200                                     | 6                 |

Table S3 (continued)

| CSD Refcode | Formula       | Space Group |        | SMILES                      | Energy rank<br>$\Delta E(\text{CSP})$<br>/ kJ/mol | RMSD <sub>30</sub><br>of CSP match<br>/ Å | Numerical<br>rank |
|-------------|---------------|-------------|--------|-----------------------------|---------------------------------------------------|-------------------------------------------|-------------------|
|             |               | symbol      | number |                             |                                                   |                                           |                   |
| EBAXIQ      | C13 H15 N1 O1 | Pbcn        | 60     | O=C1NC2CCCC2C21CCCCC2       | 1.87                                              | 0.185                                     | 5                 |
| EFUMAU      | C4 H9 N1      | P21/c       | 14     | C1CCNC1                     | 1.49                                              | 0.266                                     | 12                |
| EGOTEA      | C13 H18 O1    | P212121     | 19     | C=C1CC23CCC1CC2CC(=O)CC3    | 2.64                                              | 0.255                                     | 3                 |
| EGOZUX      | C13 H15 N1 O1 | C2/c        | 15     | O=C1CCC2CCc3ccccc3CN12      | 3.52                                              | 0.337                                     | 4                 |
| EHOPAU      | C5 H6 F4      | P21/c       | 14     | FC1CC(F)C(F)C1F             | 5.22                                              | 0.458                                     | 31                |
| EKUDUK      | C11 H6 O3     | C2/c        | 15     | O=C1OC=CC2=C1c1cccc1O2      | 2.87                                              | 0.154                                     | 8                 |
| ELUKIH      | C5 H5 N7      | Pn          | 7      | C1NC2=NC=NN2C2=NNN=C12      | 2.47                                              | 0.581                                     | 15                |
| ENANOL      | C7 H13 N1 O1  | C2/c        | 15     | O=C1CCCCCCN1                | 1.20                                              | 0.376                                     | 1                 |
| ENIDAH      | C7 H10 N2 O2  | P-1         | 2      | O=C1NC(=O)C2(CCCC2)N1       | 0.00                                              | 0.277                                     | 0                 |
| ENXBCO01    | C7 H8 O3      | P21/c       | 14     | O=C1CC2C(CC3OC23)O1         | 0.00                                              | 0.254                                     | 0                 |
| EPXCND      | C9 H12 O3     | Pnma        | 62     | C1C2OC2CC2OC2CC2OC12        | 0.00                                              | 0.138                                     | 0                 |
| EQIXEI      | C9 H6 N4 O1   | P21/c       | 14     | O=C1NN=CN2c3ccccc3N=C12     | 2.26                                              | 0.222                                     | 2                 |
| EQOLUR      | C12 H14 O2    | P-1         | 2      | C=C1C2CC3OC(=O)C42CCCCC134  | 0.00                                              | 0.114                                     | 0                 |
| ERITII      | C8 H13 N1 O1  | P212121     | 19     | O=C1NC2CCCCC12              | 0.00                                              | 0.053                                     | 0                 |
| EROGAU      | C9 H9 N1 O1   | P212121     | 19     | O=C1CCCc2cccn12             | 2.21                                              | 0.175                                     | 2                 |
| ETAJUE      | C11 H10 O3    | P21/n       | 14     | O=C1OC2Cc3ccccc3CC2O1       | 0.00                                              | 0.243                                     | 0                 |
| ETHLEN10    | C2 H4         | P21/n       | 14     | C=C                         | 0.11                                              | 0.254                                     | 5                 |
| ETOFUQ      | C11 H12 O2    | C2/m        | 12     | C1C2C=CC1C1OC3C=CC3OC21     | 0.00                                              | 0.199                                     | 0                 |
| EVAWEE      | C11 H6 N2 O2  | P21/c       | 14     | O=C1N2C=CN=C2C(=O)c2ccccc12 | 0.00                                              | 0.182                                     | 0                 |
| EVOPOV      | C10 H6 N2 O1  | Pbca        | 61     | O=C1C=Cc2ccccc2C1=[N+]=[N-] | 1.51                                              | 0.399                                     | 3                 |
| EXEBEQ      | C6 H12 N2 O1  | P21/c       | 14     | C1NC2CNCC1O2                | 0.51                                              | 0.232                                     | 1                 |
| FACFAQ      | C6 H5 F1      | P43212      | 96     | Fc1ccccc1                   | 0.00                                              | 0.208                                     | 0                 |
| FACFOE      | C6 H4 F2      | P21/n       | 14     | Fc1ccccc1F                  | 2.06                                              | 0.176                                     | 52                |
| FACGEV      | C6 H4 F2      | P21/c       | 14     | Fc1ccc(F)cc1                | 18.88                                             | 0.508                                     | 415               |
| FACJAU      | C6 H2 F4      | P21/c       | 14     | Fc1cc(F)c(F)cc1F            | 1.08                                              | 1.194                                     | 13                |
| FADMIG      | C7 H6 N2 O1   | P21/n       | 14     | O=C1NNc2ccccc12             | 3.17                                              | 0.487                                     | 14                |
| FADXOA      | C9 H7 N1 O1   | Pn          | 7      | [O-][n+]1cccc2ccccc12       | 6.34                                              | 0.413                                     | 193               |
| FAFDAS01    | C7 H8 O2      | P212121     | 19     | O=C1OCC2CC32CC13            | 1.00                                              | 0.213                                     | 1                 |
| FAFDAT      | C7 H8 O2      | P21/c       | 14     | O=C1OCC2CC32CC13            | 3.29                                              | 0.204                                     | 26                |

Table S3 (continued)

| CSD Refcode | Formula       | Space Group symbol | Space Group number | SMILES                            | Energy rank $\Delta E(\text{CSP})$ / kJ/mol | RMSD <sub>30</sub> of CSP match / Å | Numerical rank |
|-------------|---------------|--------------------|--------------------|-----------------------------------|---------------------------------------------|-------------------------------------|----------------|
| FAFDIA      | C11 H14       | C2                 | 5                  | C1CC21CC12CC21CC12CC1             | 0.30                                        | 0.240                               | 1              |
| FAFD0G      | C11 H14       | C2/c               | 15                 | C1CC21CC12CC21CC12CC1             | 1.55                                        | 0.250                               | 4              |
| FAFKEC      | C12 H18 N2    | R-3r               | 148                | C1CC2CCC1N1C3CCC(C=C3)N21         | 5.89                                        | 0.300                               | 183            |
| FAFKOM      | C12 H20 N2    | C2/c               | 15                 | C1CC2CCC1N1C3CCC(CC3)N21          | 0.00                                        | 0.225                               | 0              |
| FAHNUZ      | C9 H8 O2      | P21/c              | 14                 | O=C1C=CC2CC1C=CC2=O               | 0.94                                        | 0.652                               | 2              |
| FAJGUS      | C7 H8         | P21/c              | 14                 | C1C2C=CC1C=C2                     | 0.00                                        | 0.198                               | 0              |
| FALJEI      | C11 H13 N1 O3 | C2                 | 5                  | O=C1OC2(CC(=O)N3CCCCC23)C=C1      | 1.99                                        | 0.292                               | 6              |
| FANNUD      | C6 H9 N1 O2   | P212121            | 19                 | O=C1NC2CCCC1O2                    | 6.89                                        | 0.213                               | 13             |
| FANNUL      | C14 H14       | P21/c              | 14                 | C1=CC=CC=CC=CC=CC=CC=C1           | 0.00                                        | 0.298                               | 0              |
| FARMEQ      | C12 H8 N4     | P21/c              | 14                 | C1=CN2C(=NC3=C2N=C2C=CC=CN32)C=C1 | 3.20                                        | 0.251                               | 21             |
| FARTID      | C12 H8 O3     | P21/c              | 14                 | O=C1OCCOc2cc3cccc3cc12            | 8.65                                        | 0.333                               | 275            |
| FECKIK      | C9 H12 O2     | Pna21              | 33                 | O=C1CC2CC=CCC2OO1                 | 1.16                                        | 0.234                               | 19             |
| FEJDAA      | C11 H10 N4    | P21/c              | 14                 | C1N=NC2C1CN1C2=Nc2cccc12          | 0.00                                        | 0.254                               | 0              |
| FELCIK      | C6 H10 N2 O2  | P212121            | 19                 | C1NOC2CONCC2=C1                   | 0.00                                        | 0.189                               | 0              |
| FEPNAP      | C3 H5 N1 O1   | P-1                | 2                  | O=C1CCN1                          | 0.00                                        | 0.375                               | 0              |
| FEZYEO      | C12 H13 N1 O1 | P21/n              | 14                 | O=C1CCCC2CCN1c1cccc21             | 1.39                                        | 0.176                               | 6              |
| FIBWIW      | C12 H16 O2    | C2cb               | 41                 | O=C1C2CCC(C2)C(=O)C2CCC1C2        | 2.38                                        | 0.351                               | 1              |
| FIBWUI      | C12 H10 O2    | P21/c              | 14                 | O=C1C2C=CC3C2C1C=CC2C3=O          | 0.06                                        | 0.175                               | 1              |
| FIGDUX      | C10 H7 N3 O2  | P21/c              | 14                 | O=C1NC=C2Oc3cccc3NC2=N1           | 5.66                                        | 0.237                               | 45             |
| FIQTIK      | C5 H4 N4      | Cc                 | 9                  | c1ccn2nnnc2c1                     | 0.07                                        | 0.111                               | 2              |
| FIRLAU      | C4 H3 F2 N1   | Pbca               | 61                 | FC1=CNC=C1F                       | 3.50                                        | 0.252                               | 34             |
| FIWYIT      | C12 H6 O3     | P21/c              | 14                 | O=C1OC(=O)c2c1ccc1cccc21          | 1.64                                        | 0.525                               | 2              |
| FLNAPH      | C10 H6 F2     | P21/c              | 14                 | Fc1cccc2cccc(F)c12                | 0.00                                        | 0.130                               | 0              |
| FLUREN02    | C13 H10       | Pnma               | 62                 | C1c2cccc2c2cccc12                 | 1.77                                        | 0.320                               | 1              |
| FMANUL01    | C11 H8 F2     | Pna21              | 33                 | FC1(F)C2=CC=CC=C1C=CC=C2          | 1.78                                        | 0.237                               | 7              |
| FOBSEU      | C6 H8 N2 O2   | P21/n              | 14                 | O=C1CCN2N1CCC2=O                  | 1.29                                        | 0.414                               | 3              |
| FOCNIU      | C8 H8 F4      | Cmcm               | 63                 | FC1(F)C2CC3C(CC12)C3(F)F          | 0.00                                        | 0.180                               | 0              |
| FOFDOW      | C13 H11 N3    | P21/c              | 14                 | C1CN2c3cccc3N=C2C2=CC=CN12        | 0.00                                        | 0.384                               | 0              |
| FOLTUX      | C10 H12 O4    | P212121            | 19                 | O=C1CC2OCC3CCOC2(O3)C=C1          | 1.89                                        | 0.208                               | 2              |

Table S3 (continued)

| CSD Refcode | Formula        | Space Group symbol | Space Group number | SMILES                         | Energy rank $\Delta E(\text{CSP})$ / kJ/mol | RMSD <sub>30</sub> of CSP match / Å | Numerical rank |
|-------------|----------------|--------------------|--------------------|--------------------------------|---------------------------------------------|-------------------------------------|----------------|
| FOLXIN      | C10 H19 N3     | P21/c              | 14                 | C1CN2CCCN3CCCN(C1)C23          | 1.57                                        | 0.436                               | 3              |
| FOMQIK      | C9 H11 N1 O1   | Pna21              | 33                 | O=C1NC2(CCC=CC2)C=C1           | 3.62                                        | 0.206                               | 21             |
| FOPCOC      | C16 H16        | P21/c              | 14                 | C1CC2=CC=CC=C(C2)C2=CC=CC=C1C2 | 2.44                                        | 0.298                               | 6              |
| FOPCUI      | C16 H16        | Pbca               | 61                 | C1CC2=CC=CC=C(C2)C2=CC=CC=C1C2 | 0.00                                        | 0.144                               | 0              |
| FOSXAM      | C12 H18 N2 O1  | P21/c              | 14                 | O=C1N2CCCCCCC3CCCC3=N2         | 1.13                                        | 0.174                               | 3              |
| FOWBAU      | C5 H4 O3       | P21/m              | 11                 | O=C1OC(=O)C2CC12               | 1.16                                        | 0.326                               | 2              |
| FPYRMO      | C4 H3 F1 N2 O1 | P21/c              | 14                 | FC1=CNC(=O)N=C1                | 1.45                                        | 0.317                               | 14             |
| FUBJUI      | C14 H11 N1 O1  | P21/c              | 14                 | O=C1Nc2ccccc2C2=C1C1CC2C=C1    | 1.93                                        | 0.337                               | 2              |
| FUCOUM      | C11 H6 O3      | P21/n              | 14                 | O=C1Oc2ccc3C=COc3e2C=C1        | 0.00                                        | 0.307                               | 0              |
| FUCOUN      | C11 H6 O3      | Pna21              | 33                 | O=C1Oc2c(C=C1)ccc1OC=Cc21      | 2.30                                        | 0.219                               | 3              |
| FUDYOS      | C6 H12 N2 O4   | C2/c               | 15                 | C1CN2COOCN1COOC2               | 0.11                                        | 0.206                               | 1              |
| FUFBAJ      | C8 H12 O2      | P-1                | 2                  | C1OCC=CCOCC=C1                 | 0.00                                        | 0.170                               | 0              |
| FULZIV      | C13 H10 O2     | P212121            | 19                 | O=C1OC2C3C=CC1C2c1ccccc31      | 0.00                                        | 0.140                               | 0              |
| FURACL03    | C4 H3 F1 N2 O2 | P21/c              | 14                 | FC1=CNC(=O)NC1=O               | 0.77                                        | 0.276                               | 2              |
| FURANE10    | C4 H4 O1       | P41212             | 92                 | O1C=CC=C1                      | 6.47                                        | 0.438                               | 198            |
| FURCOU      | C11 H6 O3      | P1                 | 1                  | O=C1Oc2cc3OC=Cc3cc2C=C1        | 0.73                                        | 0.352                               | 2              |
| FUROPH      | C12 H12 O2     | Pbca               | 61                 | C1CC2=CC=C(C(CCC3=CC=C1O3)O2   | 0.00                                        | 0.690                               | 0              |
| FURPOP      | C13 H13 N1 O1  | Cc                 | 9                  | C1Cc2ccc(CCC3=CC=C1O3)nc2      | 0.00                                        | 0.128                               | 0              |
| FUTDED      | C8 H6 N2 O1    | Pna21              | 33                 | O=C1C=NNc2ccccc12              | 0.00                                        | 0.368                               | 0              |
| GACBUJ      | C14 H16 O1     | P212121            | 19                 | C=C1C=CC23CCC1CC2CC(=O)C=C3    | 0.00                                        | 0.213                               | 0              |
| GACGAU      | C8 H8 O3       | Pbca               | 61                 | O1C=CC2C1OC1OC=CC21            | 1.91                                        | 0.205                               | 4              |
| GACGEY      | C10 H10 O4     | P21/c              | 14                 | O1C=CC2C1OC1OC3OC=CC3C21       | 0.00                                        | 0.211                               | 0              |
| GAFLAB      | C2 H2 F2       | Pnma               | 62                 | FC=CF                          | 0.00                                        | 0.442                               | 0              |
| GAFLIJ      | C2 F4          | P21/n              | 14                 | FC(F)=C(F)F                    | 0.00                                        | 0.269                               | 0              |
| GAFLOP      | C2 H1 F3       | P21/n              | 14                 | FC=C(F)F                       | 1.01                                        | 0.472                               | 43             |
| GAFLUV      | C2 H2 F2       | P21/c              | 14                 | FC=CF                          | 0.14                                        | 0.421                               | 1              |
| GAHHAY      | C9 H16 N2 O1   | P21/c              | 14                 | O=C1NCCCN2CCCCC12              | 1.85                                        | 0.146                               | 3              |
| GAWWEH      | C10 H10 O2     | Pbca               | 61                 | C1Cc2cc3OCCc3cc2O1             | 2.10                                        | 0.116                               | 3              |
| GEBRAG      | C11 H14 O2     | P21/a              | 14                 | O=C1CCCCC23CCC(=O)C2C13        | 0.61                                        | 0.234                               | 1              |



Table S3 (continued)

| CSD Refcode | Formula         | Space Group symbol | Space Group number | SMILES                         | Energy rank $\Delta E(\text{CSP})$ / kJ/mol | RMSD <sub>30</sub> of CSP match / Å | Numerical rank |
|-------------|-----------------|--------------------|--------------------|--------------------------------|---------------------------------------------|-------------------------------------|----------------|
| GEDXET      | C3 H5 N5        | P21/n              | 14                 | C1CN2N=NN=C2N1                 | 0.00                                        | 0.125                               | 0              |
| GEGTAO      | C12 H11 N1 O1   | P21/n              | 14                 | C=C1CC2Cc3ccccc3N2C1=O         | 1.95                                        | 0.146                               | 5              |
| GEJXEY      | C10 H12         | Pbca               | 61                 | C1CC#CCCCC#CC1                 | 1.65                                        | 0.076                               | 3              |
| GEKVEY      | C9 H6 O2        | Pn                 | 7                  | O=C1C=CC2=COC=C2C=C1           | 3.05                                        | 0.423                               | 5              |
| GEPBOT      | C11 H6 O4       | P-1                | 2                  | O=C1OCC2=C1c1cccc1C(=O)O2      | 1.07                                        | 0.467                               | 1              |
| GERZAE      | C8 H9 F1 O4     | P212121            | 19                 | FC1C2OCC(O2)C2CC(=O)OC12       | 0.00                                        | 0.181                               | 0              |
| GESNIB      | C7 H6           | P212121            | 19                 | C1c2ccccc12                    | 0.00                                        | 0.236                               | 0              |
| GEYFOF      | C11 H12         | Iba2               | 45                 | C1CCC#CC=CC#CCC1               | 0.00                                        | 0.151                               | 0              |
| GEZKOL      | C16 H16         | P21/n              | 14                 | C1CC(CCC1=C1C=CC=C1)=C1C=CC=C1 | 0.06                                        | 0.162                               | 1              |
| GIGKUC      | C10 H12 O4      | P212121            | 19                 | O=C1CC2C1CC13OCC(COC21)O3      | 0.00                                        | 0.141                               | 0              |
| GIJBIM      | C8 H10 F2 N2 O2 | P21/c              | 14                 | FC1(F)CCC2(CC1)NC(=O)NC2=O     | 0.00                                        | 0.567                               | 0              |
| GIJBOS      | C8 H12 F2 O2    | P21/n              | 14                 | FC1(F)CCC2(CC1)OCCO2           | 0.00                                        | 0.208                               | 0              |
| GILXAD      | C13 H15 N1 O1   | P21/c              | 14                 | O=C1COC2Cc3ccccc3CN12          | 1.21                                        | 0.257                               | 2              |
| GILXIL      | C13 H11 N1 O1   | Pbca               | 61                 | O=C1C=CC=C2Cc3ccccc3CN12       | 9.26                                        | 0.386                               | 154            |
| GILXUX      | C13 H13 N1 O1   | C2/c               | 15                 | O=C1COC2=C1c1cccc1CN2          | 1.55                                        | 0.261                               | 4              |
| GINPIF      | C12 H12 N2      | P212121            | 19                 | C1Nc2ccccc2CN2C=CC=C12         | 0.71                                        | 0.213                               | 1              |
| GIPGOE      | C9 H9 N1 O3     | P21/c              | 14                 | O=C1NC2CC(O1)C1=C(C2)OC=C1     | 0.00                                        | 0.190                               | 0              |
| GIPPAW      | C8 H8 O4        | Cc                 | 9                  | O1C2C1C1OC1C1OC1C1OC21         | 1.48                                        | 0.300                               | 5              |
| GIQRAZ      | C10 H8 O3       | P21/c              | 14                 | O=C1OC(=O)C2=C1C1COC2C=C1      | 3.82                                        | 0.207                               | 3              |
| GIRSAB10    | C7 H10 N2 O2    | P21/c              | 14                 | O=C1CC2C(CN1)CNC2=O            | 2.43                                        | 0.198                               | 3              |
| GIYHUR01    | C14 H8 N2       | P21/c              | 14                 | c1cc2encc3ccc4cncc1c4c23       | 0.09                                        | 1.623                               | 1              |
| GLUTIM      | C5 H7 N1 O2     | P21/c              | 14                 | O=C1COC(=O)N1                  | 0.00                                        | 0.170                               | 0              |
| GOCGEM      | C10 H8 F1 N1 O3 | P21/n              | 14                 | Fc1ccc2NC(=O)C3(OCCO3)c2c1     | 7.66                                        | 0.311                               | 41             |
| GOCWEA      | C6 H10 O4       | P21/n              | 14                 | C1OCC2OCCOCC2O1                | 1.89                                        | 0.194                               | 4              |
| GOGXOP      | C8 H6 F2        | P-1                | 2                  | FC12C3C4C1C1C2C3C41F           | 0.00                                        | 0.469                               | 0              |
| GOHHER      | C7 H6 N2 O4     | Pbca               | 61                 | O=C1NC(=O)C2CC1C(=O)NC2=O      | 2.97                                        | 0.317                               | 1              |
| GOHVUU      | C4 H2 N4 O4     | P21/c              | 14                 | O=C1NC(=O)N2N1C(=O)NC2=O       | 0.18                                        | 1.455                               | 1              |
| GOHWAB      | C8 H8           | P-1                | 2                  | C1Cc2ccccc12                   | 0.00                                        | 0.392                               | 0              |
| GOLHAQ      | C10 H10 N4      | P21/n              | 14                 | C1Cc2ccccc2N2N=NN=C2C1         | 0.00                                        | 0.224                               | 0              |

Table S3 (continued)

| CSD Refcode | Formula        | Space Group symbol | Space Group number | SMILES                                    | Energy rank $\Delta E(\text{CSP})$ / kJ/mol | RMSD <sub>30</sub> of CSP match / Å | Numerical rank |
|-------------|----------------|--------------------|--------------------|-------------------------------------------|---------------------------------------------|-------------------------------------|----------------|
| GOLHIB      | C11 H10 N2 O1  | Cc                 | 9                  | <chem>O=C1N2C(CC3CN23)c2cccc12</chem>     | 0.00                                        | 0.287                               | 0              |
| GOLLUO01    | C11 H10 O2     | Pbca               | 61                 | <chem>O=C1C=CC(=O)C2C3CC(C=C3)C12</chem>  | 2.26                                        | 0.252                               | 8              |
| GURCOL      | C12 H8 N2      | Pca21              | 29                 | <chem>c1cnc2ccc3ncccc3c2c1</chem>         | 0.00                                        | 0.199                               | 0              |
| GUZNUL      | C6 H8 F1 N1 O2 | P212121            | 19                 | <chem>FC1C2COC(O2)C2NC12</chem>           | 0.00                                        | 0.186                               | 0              |
| GUZPAT      | C6 H8 F1 N1 O2 | P212121            | 19                 | <chem>FC1C2COC(O2)C2NC12</chem>           | 0.47                                        | 0.276                               | 1              |
| GUZPEX      | C6 H8 F1 N1 O2 | P212121            | 19                 | <chem>FC1C2COC(O2)C2NC12</chem>           | 3.56                                        | 0.288                               | 8              |
| GUZPIB      | C6 H8 F1 N1 O2 | P41                | 76                 | <chem>FC1C2COC(O2)C2NC12</chem>           | 0.04                                        | 0.417                               | 1              |
| HABYOY      | C10 H12 O3     | P21                | 4                  | <chem>O=C1CCC(O1)=C1CCCCC1=O</chem>       | 1.64                                        | 0.669                               | 5              |
| HACFOG      | C7 H9 N1 O2    | P212121            | 19                 | <chem>O=C1NC2CC=CCC2O1</chem>             | 3.65                                        | 0.229                               | 3              |
| HALKEK      | C12 H12 O2     | P21/c              | 14                 | <chem>O=C1CC2CCc3cccc3C2O1</chem>         | 1.90                                        | 0.146                               | 1              |
| HAMGOT      | C5 H4 N4       | P21                | 4                  | <chem>C1=CN2N=CN=C2N=C1</chem>            | 0.98                                        | 0.219                               | 6              |
| HARFEO      | C7 H12 F2 N2   | P21/c              | 14                 | <chem>FC1(F)C2CNCC1CNC2</chem>            | 2.03                                        | 0.823                               | 4              |
| HAYXOU      | C10 H10        | P-1                | 2                  | <chem>C1Cc2c1ccc1CCc21</chem>             | 1.26                                        | 0.377                               | 12             |
| HAYXUA      | C11 H10        | P21/n              | 14                 | <chem>C1Cc2c1c1CCc1c1Cc21</chem>          | 0.34                                        | 1.451                               | 8              |
| HAYYAH      | C12 H12        | P21/n              | 14                 | <chem>C1Cc2c1c1CCc1c1CCc21</chem>         | 0.89                                        | 0.225                               | 4              |
| HBZIND01    | C11 H7 N1 O1   | P21/c              | 14                 | <chem>O=C1C=CC2=CNc3cccc1c23</chem>       | 0.00                                        | 0.164                               | 0              |
| HBZPEN      | C14 H10        | P21/c              | 14                 | <chem>C1c2cccc3Cc4cccc1c4c23</chem>       | 4.30                                        | 0.240                               | 20             |
| HDPDXZ      | C10 H18 N2 O2  | P21/c              | 14                 | <chem>C1CCN2OC3CCCCN3OC2C1</chem>         | 2.37                                        | 0.271                               | 21             |
| HEBBEV      | C9 H12 O2      | C2/c               | 15                 | <chem>O=C1CCC2CC1CCC2=O</chem>            | 0.00                                        | 0.094                               | 0              |
| HEGSUK      | C4 H4 N2 O2    | Pn                 | 7                  | <chem>[O-][n+][c]ccc[n+][l][O-]</chem>    | 0.53                                        | 0.351                               | 3              |
| HEKTIA      | C4 H2 F2 N2 O3 | P212121            | 19                 | <chem>FC1(F)C(=O)NC(=O)NC1=O</chem>       | 0.00                                        | 0.598                               | 0              |
| HEPFUL10    | C14 H12        | P21/c              | 14                 | <chem>C1=CC=CC(C=C1)=C1C=CC=CC=C1</chem>  | 0.00                                        | 0.178                               | 0              |
| HERMIB      | C8 H6 F1 N1 O1 | P21                | 4                  | <chem>Fc1ccc2NC(=O)Cc2c1</chem>           | 5.28                                        | 0.649                               | 79             |
| HETNQU01    | C12 H12 O2     | P212121            | 19                 | <chem>O=C1C=CC(=O)C2C3CCC(C=C3)C12</chem> | 2.11                                        | 0.189                               | 2              |
| HEWQIK      | C8 H4 N4 O2    | P21/c              | 14                 | <chem>O=C1N2C=NC=C2C(=O)N2C=NC=C12</chem> | 0.11                                        | 0.310                               | 1              |
| HEZQUY02    | C8 H6 O2       | P21/c              | 14                 | <chem>O=C1OCC2cccc12</chem>               | 0.11                                        | 0.144                               | 1              |
| HIBXOF      | C13 H9 N1 O1   | P21/n              | 14                 | <chem>O=C1c2cccc2Nc2cccc12</chem>         | 0.00                                        | 0.291                               | 0              |
| HIFCIJ      | C8 H10 N2      | Pbca               | 61                 | <chem>C1CNc2cccc2N1</chem>                | 0.00                                        | 0.265                               | 0              |
| HIFMUE      | C12 H8 N2 O1   | P212121            | 19                 | <chem>O=C1c2cccc2Nc2hcccc12</chem>        | 2.35                                        | 0.871                               | 6              |

Table S3 (continued)

| CSD Refcode | Formula       | Space Group |        | SMILES                       | Energy rank<br>$\Delta E(\text{CSP})$<br>/ kJ/mol | RMSD <sub>30</sub><br>of CSP match<br>/ Å | Numerical<br>rank |
|-------------|---------------|-------------|--------|------------------------------|---------------------------------------------------|-------------------------------------------|-------------------|
|             |               | symbol      | number |                              |                                                   |                                           |                   |
| HIKFOW      | C11 H13 N1 O3 | P21/c       | 14     | O=C1OC2(CCCN3C2CC3=O)C=C1    | 0.00                                              | 0.200                                     | 0                 |
| HIKJUJ      | C11 H15 N1 O3 | P21         | 4      | O=C1OC23OC2CCOC23CCCCN12     | 1.19                                              | 0.182                                     | 1                 |
| HINPOM      | C11 H22 N2 O1 | Pbca        | 61     | O=C1CCCCCNCNCCC1             | 0.00                                              | 0.214                                     | 0                 |
| HIPXUZ      | C8 H12        | I2/a        | 15     | C1CC21CC1(CCC1)C2            | 0.00                                              | 0.173                                     | 0                 |
| HIQJOJ      | C5 H9 N1 O1   | P21/c       | 14     | O=C1CCCCN1                   | 1.32                                              | 0.204                                     | 4                 |
| HIRJAV      | C10 H12 O4    | P21/n       | 14     | O=C1CCCC(=O)C(=O)CCCC1=O     | 0.00                                              | 0.100                                     | 0                 |
| HIRQOP      | C12 H11 N1 O2 | Pnma        | 62     | O=C1CCN2CCC(=O)c3cccc1c23    | 0.00                                              | 0.260                                     | 0                 |
| HIRSUX      | C7 H4 O3      | C2/c        | 15     | O=C1Oe2cccc2O1               | 0.00                                              | 0.186                                     | 0                 |
| HITBOD      | C10 H6 O4     | P21/c       | 14     | O=C1C2ccc3OC(=O)Cc3c2O1      | 4.43                                              | 0.361                                     | 5                 |
| HITQOT      | C11 H15 N1 O2 | P212121     | 19     | O=C1NC23CC4CC(C3)CC2(C4)O1   | 0.18                                              | 0.153                                     | 1                 |
| HIXJEE      | C9 H12 O3     | P212121     | 19     | O=C1OC2CCC1C1OCCC21          | 0.00                                              | 0.229                                     | 0                 |
| HIYLIK      | C14 H9 N1 O1  | C2/c        | 15     | O=C1C=CC2=Nc3cccc3C=CC2=C1   | 3.73                                              | 0.809                                     | 28                |
| HMTRAO10    | C6 H12 N4 O1  | R3m         | 160    | [O-][N+]=12CN3CN(CN(C3)C1)C2 | 0.00                                              | 0.196                                     | 0                 |
| HOBBOP      | C7 H10        | P21/c       | 14     | C1CC2CC1C=C2                 | 0.00                                              | 0.227                                     | 0                 |
| HODXII      | C13 H13 N1 O1 | P21/c       | 14     | O=C1CCCCC2=C1Nc1cccc21       | 0.00                                              | 0.248                                     | 0                 |
| HOHLAR01    | C10 H18 N2 O2 | C2/c        | 15     | C1CCC23NCCOC2(C1)NCCO3       | 0.69                                              | 0.232                                     | 2                 |
| HOLPHI      | C12 H18 N2 O1 | P21/n       | 14     | O=C1NC2(CCCCC2)NC2=C1CCCC2   | 0.00                                              | 0.249                                     | 0                 |
| HOMQIJ      | C14 H20       | P21/n       | 14     | C1CC2CCC1C1=C2C2CCC1CC2      | 1.26                                              | 0.167                                     | 3                 |
| HOMQUV      | C14 H20 O1    | P-1         | 2      | C1CC2CCC1C13OC21C1CCC3CC1    | 0.00                                              | 0.160                                     | 0                 |
| HOSNEI      | C11 H7 N1 O1  | Pbca        | 61     | O=C1N2C=CC=C2c2cccc12        | 2.05                                              | 0.380                                     | 3                 |
| HOWBAW      | C8 H16 N4     | P-1         | 2      | C1CN2CN3CCCN3CN2C1           | 0.16                                              | 0.328                                     | 2                 |
| HOWYID      | C11 H11 N1 O2 | Pna21       | 33     | O=C1NC2CCOC2c2cccc12         | 0.32                                              | 0.248                                     | 2                 |
| HOXRES      | C4 F6         | P21/c       | 14     | FC1=C(F)C(F)(F)C1(F)F        | 0.26                                              | 0.123                                     | 4                 |
| HPANDO      | C14 H10 O1    | P21/a       | 14     | O1C2C1c1cccc1c1cccc21        | 1.95                                              | 0.149                                     | 2                 |
| HPYDZO10    | C4 H6 N2 O2   | Ibca        | 73     | O=C1CCCC(=O)NN1              | 6.62                                              | 0.427                                     | 59                |
| HQOXAL01    | C8 H6 N2 O1   | P212121     | 19     | O=C1Nc2cccc2N=C1             | 1.09                                              | 0.184                                     | 9                 |
| HQOXDO04    | C8 H6 N2 O2   | P21/n       | 14     | O=C1Nc2cccc2NC1=O            | 0.00                                              | 0.204                                     | 0                 |
| HURYUQ      | C11 H14 O3    | P1          | 1      | C=C1CC2COC2CC(=O)OC23C1      | 1.20                                              | 0.527                                     | 3                 |
| HURZAX      | C13 H18 O2    | P-1         | 2      | C=C1CC2CCCC3CCC(=O)OC23C1    | 1.93                                              | 0.299                                     | 4                 |

Table S3 (continued)

| CSD Refcode | Formula       | Space Group |        | SMILES                       | Energy rank<br>$\Delta E(\text{CSP})$<br>/ kJ/mol | RMSD <sub>30</sub><br>of CSP match<br>/ Å | Numerical<br>rank |
|-------------|---------------|-------------|--------|------------------------------|---------------------------------------------------|-------------------------------------------|-------------------|
|             |               | symbol      | number |                              |                                                   |                                           |                   |
| HUWGUB      | C10 H10 O3    | P-1         | 2      | O=C1OCC23C4C(CC12)C4C3=O     | 0.00                                              | 0.183                                     | 0                 |
| HXMTAMI0    | C6 H12 N4     | I-43m       | 217    | C1N2CN3CN1CN(C2)C3           | 0.00                                              | 0.074                                     | 0                 |
| HXQUJO02    | C9 H7 N1 O1   | P212121     | 19     | O=C1Nc2ccccc2C=C1            | 0.54                                              | 0.288                                     | 5                 |
| IBESUD      | C8 H11 N1 O2  | C2/c        | 15     | O=C1CCCC2=CCON1C2            | 6.65                                              | 0.431                                     | 73                |
| IBETAK      | C9 H13 N1 O2  | C2/c        | 15     | O=C1CCCCC2=CCON1C2           | 3.35                                              | 0.332                                     | 13                |
| IBOHIT      | C6 H2 N6 O2   | P21/c       | 14     | O=C1C2=NNN=C2C(=O)C2=NNN=C12 | 2.54                                              | 0.152                                     | 1                 |
| ICEANE      | C12 H18       | P63/m       | 176    | C1C2CC3CC1C1CC2CC3C1         | 0.00                                              | 0.335                                     | 0                 |
| ICEFON      | C8 H4 F4 O2   | C2/c        | 15     | Fc1c(F)c(F)c2OCCOoc2c1F      | 1.30                                              | 0.395                                     | 2                 |
| IDIXEY      | C4 F4         | P21/c       | 14     | FC(F)=C=C=C(F)F              | 1.69                                              | 0.282                                     | 6                 |
| IDOFAL      | C10 H10 O1    | P21         | 4      | O=C1C=CC2C3CC(C=C3)C12       | 0.00                                              | 0.194                                     | 0                 |
| IDOFEP      | C10 H10 O1    | P21         | 4      | O=C1C=CC2C3CC(C=C3)C12       | 0.00                                              | 0.187                                     | 0                 |
| IDOREY      | C8 H12        | P-1         | 2      | C1CC(C1)=C1CCCC1             | 0.00                                              | 0.208                                     | 0                 |
| IDOSAW01    | C14 H11 N1 O1 | P-1         | 2      | O=C1Nc2ccccc2Cc2ccccc12      | 0.00                                              | 0.311                                     | 0                 |
| IFILEO      | C10 H10 O3    | P21/c       | 14     | O=C1OC(=O)C2C3CCC(C=C3)C12   | 0.00                                              | 0.282                                     | 0                 |
| IHEPUG      | C8 H11 N1 O2  | P41212      | 92     | O=C1NC(=O)C2CCCCC12          | 11.10                                             | 0.514                                     | 39                |
| IHEPUG02    | C8 H11 N1 O2  | P212121     | 19     | O=C1NC(=O)C2CCCCC12          | None                                              | None                                      | None              |
| IJISAX      | C9 H16 N2 O2  | Pca21       | 29     | C1COC2(O1)C1CNCC2CN1         | 0.00                                              | 0.158                                     | 0                 |
| IMARAR      | C8 H9 N1 O4   | P21/c       | 14     | O=C1OCC2C3COC(=O)N3CC12      | 6.85                                              | 0.402                                     | 86                |
| IMAZOL03    | C3 H4 N2      | P21/n       | 14     | N1C=CN=C1                    | 0.00                                              | 0.152                                     | 0                 |
| IMAZOL22    | C3 H4 N2      | Aba2        | 41     | N1C=CN=C1                    | 4.97                                              | 0.533                                     | 24                |
| IMTRAZ      | C5 H4 N4      | P21/n       | 14     | C1=NN2C=CN=C2N=C1            | 0.00                                              | 0.217                                     | 0                 |
| INDAZL02    | C7 H6 N2      | P21         | 4      | N1N=Cc2ccccc12               | 3.44                                              | 0.929                                     | 10                |
| INDDON      | C9 H6 O2      | I41/a       | 88     | O=C1CC(=O)c2ccccc12          | 1.07                                              | 0.095                                     | 2                 |
| IQUUNCO     | C7 H11 N1 O1  | P21/c       | 14     | O=C1NC2CC1CC2                | 0.00                                              | 0.142                                     | 0                 |
| ISATIN04    | C8 H5 N1 O2   | P21/c       | 14     | O=C1Nc2ccccc2C1=O            | 0.00                                              | 0.112                                     | 0                 |
| ITIZOA      | C4 H10 N2     | P21/n       | 14     | C1CNCCN1                     | 2.28                                              | 0.345                                     | 4                 |
| ITIZUG      | C4 H9 N1 O1   | P212121     | 19     | C1COCCN1                     | 1.19                                              | 0.221                                     | 3                 |
| ITOBAU01    | C5 H11 N1     | P21/c       | 14     | C1CCNCC1                     | 1.15                                              | 0.218                                     | 5                 |
| IWUDEJ      | C10 H13 N1 O2 | P212121     | 19     | O=C1OCC2CC3=CCOC3CN12        | 0.00                                              | 0.502                                     | 0                 |

Table S3 (continued)

| CSD Refcode | Formula       | Space Group symbol | Space Group number | SMILES                                      | Energy rank $\Delta E(\text{CSP})$ / kJ/mol | RMSD <sub>30</sub> of CSP match / Å | Numerical rank |
|-------------|---------------|--------------------|--------------------|---------------------------------------------|---------------------------------------------|-------------------------------------|----------------|
| IYINAF01    | C8 H10 O1     | P21/c              | 14                 | <chem>C1C=CC2CC=CC1O2</chem>                | 0.00                                        | 0.262                               | 0              |
| IYUTH       | C12 H16 N2    | P21/n              | 14                 | <chem>C1CCC2nc3CCCCc3nc2C1</chem>           | 0.00                                        | 0.279                               | 0              |
| IZALOM      | C12 H12 O2    | P21/n              | 14                 | <chem>O=C1CC2C=C3CCCC3CC2O1</chem>          | 0.40                                        | 0.262                               | 2              |
| IZLJOQ      | C10 H15 N1 O2 | P21/c              | 14                 | <chem>O=C1CCCCCCC2=CCON1C2</chem>           | 3.58                                        | 0.261                               | 14             |
| JASGIT      | C12 H12 O3    | Pna21              | 33                 | <chem>O=C1CCC2=C1CCCC1=C(C2)C(=O)OC1</chem> | 15.77                                       | 1.837                               | 741            |
| JAYFEU      | C12 H16       | Pbca               | 61                 | <chem>C1C=CCC=CCC=CCC=C1</chem>             | 2.10                                        | 0.216                               | 30             |
| JAZDOD02    | C12 H11 N1 O1 | Pna21              | 33                 | <chem>O=C1CCCC2=C1c1cccc1N2</chem>          | 0.28                                        | 0.302                               | 2              |
| JEDVET      | C6 H9 N1 O1   | P21/c              | 14                 | <chem>O=C1NC2CCCC12</chem>                  | 0.96                                        | 0.133                               | 5              |
| JEHHEJ      | C14 H18       | P21/c              | 14                 | <chem>C1CC2CCCC(C1)C2=C1C=CC=C1</chem>      | 2.35                                        | 0.491                               | 11             |
| JEZZOD      | C9 H8 N2 O1   | I-42d              | 122                | <chem>O=C1NC23C4C5C6C4C2(N1)C6C35</chem>    | 0.00                                        | 0.162                               | 0              |
| JIBFOP      | C10 H14 O2    | P21/n              | 14                 | <chem>O=C1CCCC2C1CCCC2=O</chem>             | 0.00                                        | 0.803                               | 0              |
| JICZEA      | C15 H12 O1    | Pna21              | 33                 | <chem>C1c2cccc2C2OC2e2cccc12</chem>         | 0.00                                        | 0.258                               | 0              |
| JIGJUE10    | C12 H9 N1 O1  | P-1                | 2                  | <chem>O=C1C=CC2=Cc3cccc3CN12</chem>         | 0.00                                        | 0.292                               | 0              |
| JINZAI      | C7 H8 O3      | P21                | 4                  | <chem>O=C1CC2OC(CO1)C=C2</chem>             | 0.04                                        | 0.279                               | 1              |
| JITMEE      | C13 H16 O1    | P212121            | 19                 | <chem>O=C1C2C=CC1C1CCC=CCCC21</chem>        | 0.00                                        | 0.145                               | 0              |
| JIVRIS      | C6 H4 O5      | P21                | 4                  | <chem>O=C1CC2C(O1)C(=O)OC2=O</chem>         | 3.30                                        | 0.504                               | 2              |
| JIYTUG      | C9 H15 N1 O2  | P21/n              | 14                 | <chem>O=C1COCCC2CCCCC2N1</chem>             | 0.00                                        | 0.227                               | 0              |
| JODCOW      | C12 H14 N2 O1 | P212121            | 19                 | <chem>O=C1CNCC2N1CCc1cccc21</chem>          | 0.99                                        | 0.328                               | 1              |
| JOLGUM      | C15 H10 O1    | P21/c              | 14                 | <chem>O=C1C2cccc3c4cccc(C1)c4c23</chem>     | 2.96                                        | 0.421                               | 12             |
| JONSIO      | C1 H1 F2 N1   | P21/n              | 14                 | <chem>FC(F)=N</chem>                        | 0.33                                        | 0.118                               | 2              |
| JONVOX      | C13 H12       | C2/c               | 15                 | <chem>C1CC2=C3CC(=CC=C2)C=CC=C13</chem>     | 4.15                                        | 0.237                               | 26             |
| JOPLP       | C13 H22 O1    | Pbca               | 61                 | <chem>O=C1CC2CCCCCCC(C2)C1</chem>           | 0.00                                        | 0.232                               | 0              |
| JOSLOU      | C13 H11 N1    | P21                | 4                  | <chem>C1c2cccc2Nc2cccc12</chem>             | 0.00                                        | 0.374                               | 0              |
| JUDZIR      | C8 H12 O6     | P21/c              | 14                 | <chem>C1CO23OCCOC2(O1)OCCO3</chem>          | 1.28                                        | 0.162                               | 1              |
| JUTCEI      | C10 H14 O4    | C2                 | 5                  | <chem>C1CC2C(O1)OC1OC3OCCCC3C21</chem>      | 0.00                                        | 0.288                               | 0              |
| JUVKAM      | C8 H8 O2      | Pbca               | 61                 | <chem>O=C1OC(=C2CC2)C21CC2</chem>           | 0.41                                        | 0.120                               | 1              |
| JUXJER      | C9 H5 F1 O2   | P21                | 4                  | <chem>Fc1ccc2C=CC(=O)Oc2c1</chem>           | 0.72                                        | 0.332                               | 4              |
| KAJRIY      | C6 H10 N4 O1  | P212121            | 19                 | <chem>[O]N1=NN2CCCCCCC2=N1</chem>           | 4.84                                        | 0.270                               | 14             |
| KEFGUZ      | C16 H12       | P21/c              | 14                 | <chem>C1c2cccc2C1=C1C2cccc12</chem>         | 0.00                                        | 0.624                               | 0              |

Table S3 (continued)

| CSD Refcode | Formula        | Space Group symbol | Space Group number | SMILES                                       | Energy rank $\Delta E(\text{CSP})$ / kJ/mol | RMSD <sub>30</sub> of CSP match / Å | Numerical rank |
|-------------|----------------|--------------------|--------------------|----------------------------------------------|---------------------------------------------|-------------------------------------|----------------|
| KEJYOP      | C9 H11 N3 O1   | P21/c              | 14                 | <chem>O=C1CN2C=CC=C2C2NCCN12</chem>          | 0.00                                        | 0.271                               | 0              |
| KEMHIT      | C14 H11 N1 O1  | P21/n              | 14                 | <chem>N1C2=CC=CC=C1C=C1OC(=C2)C=CC=C1</chem> | 2.02                                        | 0.416                               | 4              |
| KEMTIG      | C13 H12 O2     | Pbcn               | 60                 | <chem>O=C1Oc2ccccc2C2C=CCCC12</chem>         | 1.10                                        | 0.182                               | 3              |
| KEMZIL01    | C1 H2 O1       | P-421c             | 114                | <chem>C=O</chem>                             | 2.60                                        | 0.464                               | 190            |
| KEPKIZ      | C5 H2 N6 O2    | P212121            | 19                 | <chem>[O]N1=C2C=CC3=NN=NN3C2=NO1</chem>      | 5.09                                        | 0.261                               | 10             |
| KEQSOQ      | C7 H14 N2      | P212121            | 19                 | <chem>C1NCC2CNCC1C2</chem>                   | 0.15                                        | 0.370                               | 1              |
| KIGCEL      | C9 H10 O3      | C2/c               | 15                 | <chem>O=C1C=CC2CC3COC13O2</chem>             | 0.24                                        | 0.249                               | 1              |
| KIMCOY      | C8 H8 O2       | P21/c              | 14                 | <chem>C1OCC#CCOCC#C1</chem>                  | 0.00                                        | 0.173                               | 0              |
| KISGAW      | C12 H7 N1 O1   | P21/c              | 14                 | <chem>O=C1c2ccccc2c2ncccc12</chem>           | 0.00                                        | 0.792                               | 0              |
| KISGUQ      | C12 H7 N1 O2   | Pc21b              | 29                 | <chem>O=C1c2ccccc2Oc2cnc12</chem>            | 0.00                                        | 0.193                               | 0              |
| KIXSIT      | C13 H11 N1 O1  | P212121            | 19                 | <chem>O=C1C=C2NCC3CC23c2ccccc12</chem>       | 0.00                                        | 0.261                               | 0              |
| KIZKOU      | C8 H12 N2 O2   | P43212             | 96                 | <chem>O=C1NCC2CCCC2NC1=O</chem>              | 0.00                                        | 0.227                               | 0              |
| KOBXOO      | C3 H4 N4 O3    | P21/n              | 14                 | <chem>[NH2+]=C1NNC(=O)C1=N(=O)[O-]</chem>    | 12.47                                       | 0.753                               | 75             |
| KOGFER      | C13 H16 O2     | P21/n              | 14                 | <chem>C=C1C(=O)OC21C1CC3CC(C1)CC2C3</chem>   | 0.37                                        | 0.247                               | 1              |
| KOJGOH      | C11 H14 O3     | P212121            | 19                 | <chem>O=C1CC2OCC3C2OC21C0CC32</chem>         | 0.47                                        | 0.228                               | 1              |
| KOJGUM      | C9 H6 N4       | C2/c               | 15                 | <chem>C1=CN2N=C3C=CC=NC3=C2N=C1</chem>       | 3.25                                        | 0.613                               | 29             |
| KOJGUN      | C11 H12 O4     | P21/c              | 14                 | <chem>O=C1OC2CC(=O)C34CCCC3C1C2O4</chem>     | 0.00                                        | 0.259                               | 0              |
| KORWOF      | C4 H5 F2 N1 O2 | P21/c              | 14                 | <chem>FC1(F)CNC(=O)OC1</chem>                | 0.13                                        | 0.154                               | 1              |
| KOVBEK      | C13 H16        | Pbcn               | 60                 | <chem>C1CC21C1(CC1)C12C2(CC2)C21CC2</chem>   | 2.49                                        | 0.448                               | 16             |
| KOXRIY      | C2 H3 N3 O2    | P21/n              | 14                 | <chem>O=C1NNC(=O)N1</chem>                   | 4.31                                        | 0.307                               | 24             |
| KOYLIT      | C6 H4 N4 O2    | Pcab               | 61                 |                                              | 2.25                                        | 0.218                               | 10             |
| KUKTEQ      | C9 H6 O5       | P21/n              | 14                 | <chem>O=C1OC2C=CC1C1C2C(=O)OC1=O</chem>      | 0.00                                        | 0.162                               | 0              |
| KUVCP       | C4 H4 N2       | Pna21              | 33                 | <chem>c1cncnc1</chem>                        | 0.30                                        | 0.178                               | 2              |
| LADVIV10    | C12 H16 O2     | P21/n              | 14                 | <chem>O=C1C2CCC31CCCC13CCC2O1</chem>         | 0.00                                        | 0.107                               | 0              |
| LAFJUX      | C6 H8 O3       | P212121            | 19                 | <chem>O=C1OCC2CCOC12</chem>                  | 0.00                                        | 0.554                               | 0              |
| LAKDAD      | C10 H10 O3     | P212121            | 19                 | <chem>O1C2C1C1C3C4OC4C2C2OC2C13</chem>       | 0.00                                        | 0.220                               | 0              |
| LAKDEH      | C10 H10 O3     | P-1                | 2                  | <chem>O1C2C3OC4C5OC(C1C1C3C51)C24</chem>     | 0.00                                        | 0.244                               | 0              |
| LANZAC      | C11 H12 O1     | P21/n              | 14                 | <chem>O=C1C=C2CCC3CC23C21CC2</chem>          | 0.53                                        | 0.187                               | 2              |
| LAXFOH      | C3 H2 F2       | P21/c              | 14                 | <chem>FC=C=CF</chem>                         | 0.26                                        | 0.233                               | 1              |

Table S3 (continued)

| CSD Refcode | Formula       | Space Group symbol | Space Group number | SMILES                        | Energy rank $\Delta E(\text{CSP})$ / kJ/mol | RMSD <sub>30</sub> of CSP match / Å | Numerical rank |
|-------------|---------------|--------------------|--------------------|-------------------------------|---------------------------------------------|-------------------------------------|----------------|
| LAXFUN      | C3 H1 F3      | P21/c              | 14                 | FC=C=C(F)F                    | 1.36                                        | 0.152                               | 11             |
| LEZOL       | C12 H6 O3     | P65                | 170                | O1C=Cc2c1c1C=COc1c1C=COc21    | 0.46                                        | 0.576                               | 2              |
| LEGPE       | C12 H11 N1 O2 | P21/c              | 14                 | O=C1CCCC2N1Cc1cccc1C2=O       | 5.80                                        | 0.390                               | 32             |
| LEHMOD      | C12 H12 O2    | Pbca               | 61                 | O=C1CCCCC2C1Oc1cccc21         | 0.00                                        | 0.206                               | 0              |
| LEHQIZ      | C6 H7 N1 O2   | P21/c              | 14                 | O=C1NC(=O)C2CCCC12            | 4.35                                        | 0.189                               | 8              |
| LENYOS      | C10 H12 O3    | Pcab               | 61                 | C1COc2cccc2OCCO1              | 0.00                                        | 0.281                               | 0              |
| LERGOG      | C6 H5 N3 O1   | P21/n              | 14                 | O=C1NC=NC2=C1NC=C2            | 6.81                                        | 2.067                               | 23             |
| LEXSIT      | C12 H15 N1 O1 | P212121            | 19                 | C1CC2(CCO1)CNc1cccc21         | 0.93                                        | 0.184                               | 1              |
| LJFUG       | C5 H6 O3      | P212121            | 19                 | O=C1CCCC(=O)O1                | 0.00                                        | 0.180                               | 0              |
| LINKOI      | C14 H10 O1    | Pbca               | 61                 | O=C1CCCC#Cc2cccc2C#C1         | 0.59                                        | 0.249                               | 4              |
| LINMOK      | C7 H13 N3     | P21/n              | 14                 | C1CN2CCN3CCN1C23              | 2.40                                        | 0.269                               | 17             |
| LISXOB      | C7 H8 O3      | P212121            | 19                 | O=C1CC2C3CC3OC2O1             | 1.28                                        | 0.177                               | 1              |
| LHWPT       | C7 H9 N1 O2   | P21/c              | 14                 | O=C1CC(=O)C2(CCC2)N1          | 4.19                                        | 0.338                               | 9              |
| LOGFAO      | C8 H10 O3     | Pc                 | 7                  | O=C1OCCCI=C1CCCO1             | 5.55                                        | 0.348                               | 53             |
| LOVBIH      | C13 H8 O2     | P21/n              | 14                 | O=C1OC=Cc2c1ccc1cccc21        | 4.19                                        | 0.242                               | 16             |
| LOVWIC      | C3 H2 F2      | P21/a              | 14                 | FC(F)=C=C                     | 1.45                                        | 0.476                               | 18             |
| LOVWOI      | C3 F4         | Ccca               | 68                 | FC(F)=C=C(F)F                 | 7.60                                        | 0.125                               | 9              |
| LPROGL04    | C7 H10 N2 O2  | P212121            | 19                 | O=C1CNC(=O)C2CCCN12           | 0.00                                        | 0.318                               | 0              |
| LUVCEK      | C13 H15 N1 O1 | P21/c              | 14                 | O=C1Nc2cccc2C2CCCC12          | 0.00                                        | 0.219                               | 0              |
| LUXVOP      | C10 H12 N4    | Ccca               | 68                 | C1C2CC3CC(C1C13N=N1)C12N=N1   | 2.18                                        | 0.166                               | 2              |
| MAGXAV      | C5 H4 F1 N1   | Pbca               | 61                 | Fc1cccn1                      | 1.06                                        | 0.330                               | 8              |
| MAGXEZ      | C5 H3 F2 N1   | Pn                 | 7                  | Fc1cccc(F)n1                  | 0.72                                        | 0.230                               | 6              |
| MAMXIJ      | C13 H9 N1     | C2/c               | 15                 | c1ccc2cc3ncccc3cc2c1          | 2.97                                        | 0.152                               | 15             |
| MAYXEP      | C10 H12 O2    | P21/n              | 14                 | C1CC2OC1C1C3OC(C=C3)C21       | 1.40                                        | 0.170                               | 7              |
| MAYXIT      | C10 H12 O2    | P21/a              | 14                 | C1CC2OC1C1C3OC(C=C3)C21       | 1.85                                        | 0.185                               | 9              |
| MCYPDE      | C16 H12       | P21/a              | 14                 | c1cc2C=Cc3cccc(C=Cc(c1)c2)c3  | 0.00                                        | 0.208                               | 0              |
| MEBCEC      | C10 H15 N1 O2 | P21/c              | 14                 | O=C1CC2(CCCCC2)CC(=O)N1       | 2.22                                        | 0.147                               | 5              |
| MEGNES      | C14 H8 N2     | P42/mbc            | 135                | c1cc2cccc3c4nccnc4c(c1)c23    | None                                        | None                                | None           |
| MEKWUV      | C15 H18       | P21                | 4                  | C1CC21CC12CC21CC12CC21CC12CC1 | 2.35                                        | 0.549                               | 4              |

Table S3 (continued)

| CSD Refcode | Formula         | Space Group |        | SMILES                       | Energy rank<br>$\Delta E(\text{CSP})$<br>/ kJ/mol | RMSD <sub>30</sub><br>of CSP match<br>/ Å | Numerical<br>rank |
|-------------|-----------------|-------------|--------|------------------------------|---------------------------------------------------|-------------------------------------------|-------------------|
|             |                 | symbol      | number |                              |                                                   |                                           |                   |
| MEMTED      | C12 H10 N2      | Pbca        | 61     | N1c2ccccc2Nc2ccccc12         | 1.36                                              | 0.380                                     | 1                 |
| MEOXAL      | C3 H2 O4        | P41         | 76     | O=C1OCOC1=O                  | 6.42                                              | 0.480                                     | 40                |
| METCEN      | C16 H14         | Pbca        | 61     | C1Cc2cccc(C=Cc3ccccc1c3)c2   | 1.52                                              | 0.429                                     | 5                 |
| METCYP      | C16 H16         | P21/c       | 14     | C1Cc2cccc(CCc3ccccc1c3)c2    | 0.22                                              | 0.445                                     | 1                 |
| MEXCUP      | C5 H4 O3        | P212121     | 19     | C=C1CC(=O)OC1=O              | 0.00                                              | 0.170                                     | 0                 |
| MIBVUQ      | C16 H16         | P42/mmm     | 136    | C1Cc2ccc(CCc3ccccc1cc3)cc2   | 0.00                                              | 0.042                                     | 0                 |
| MILYIP      | C6 H6 N2 O1     | Pnma        | 62     | O=C1NC=NC2=C1CC2             | 4.51                                              | 0.319                                     | 8                 |
| MIMTEI      | C11 H11 N1 O1   | P-1         | 2      | O=C1CCC2Cc3ccccc3N12         | 0.00                                              | 0.538                                     | 0                 |
| MINZAN      | C8 H7 N1 O2     | P21/c       | 14     | O=C1CC2(N1)C=CC(=O)C=C2      | 0.00                                              | 0.362                                     | 0                 |
| MINZOB      | C9 H9 N1 O2     | P21         | 4      | O=C1CCC2(N1)C=CC(=O)C=C2     | 3.27                                              | 0.247                                     | 7                 |
| MIXPEO      | C9 H5 N3 O2     | P212121     | 19     | O=C1C2=CN=NN2Oc2ccccc12      | 0.00                                              | 0.160                                     | 0                 |
| MLEICA01    | C4 H2 O3        | P212121     | 19     | O=C1OC(=O)C=C1               | 0.18                                              | 0.194                                     | 1                 |
| MNBZDO      | C14 H10 O1      | Pbca        | 61     | O=C1C=CC2=CC=CC3=CC=CC1=C2C3 | 1.45                                              | 0.144                                     | 5                 |
| MOFBUF02    | C8 H6 N2 O2     | P21/c       | 14     | O=C1NC(=O)c2ccccc2N1         | 0.00                                              | 1.303                                     | 0                 |
| MOGMOM      | C8 H10 F1 N1 O1 | P212121     | 19     | FC1=CCC2CCN2C1=O             | 0.00                                              | 0.356                                     | 0                 |
| MPCYLP10    | C16 H12         | Pbca        | 61     | c1cc2C=Cc3ccc(cc3)C=Cc(c1)c2 | 8.14                                              | 0.316                                     | 189               |
| MTANNL      | C11 H10         | Fdd2        | 43     | C1C2=CC=CC=C1C=CC=C2         | 0.47                                              | 0.240                                     | 1                 |
| MUMSET      | C4 H1 F3 N2 O1  | P21/c       | 14     | FC1=NNC(=O)C(=C1F)F          | 4.87                                              | 0.206                                     | 18                |
| MUXRAA      | C13 H9 N1 O1    | C2/c        | 15     | O=C1C=CC=C2C=Cc3ccccc3N12    | 0.99                                              | 0.607                                     | 2                 |
| NADVIX      | C7 H10          | P21/n       | 14     | C1CC21CC12CC1                | 1.01                                              | 0.940                                     | 8                 |
| NADVUJ      | C9 H12          | P212121     | 19     | C1CC21CC12CC21CC2            | 1.01                                              | 0.327                                     | 13                |
| NADWAQ      | C11 H14         | P21/c       | 14     | C1CC21CC12C2(CC2)C21CC2      | 1.22                                              | 0.330                                     | 4                 |
| NADWEU      | C8 H10          | P21/c       | 14     | C1CC1=C1CC21CC2              | 5.20                                              | 0.356                                     | 183               |
| NADWIY      | C10 H12         | P-1         | 2      | C1CC1=C1CC21CC12CC1          | 2.95                                              | 0.407                                     | 15                |
| NADWOE      | C10 H12         | P21/m       | 11     | C1CC1=C1C2(CC2)C21CC2        | 1.63                                              | 0.386                                     | 3                 |
| NAGVEZ      | C8 H4 F1 N1 O2  | P212121     | 19     | Fc1ccc2C(=O)C(=O)Nc2c1       | 2.51                                              | 0.741                                     | 1                 |
| NAHBH       | C11 H19 N1 O1   | P21/c       | 14     | O=C1NCCCCC2CCCCC12           | 0.00                                              | 0.144                                     | 0                 |
| NAHBON      | C9 H15 N1 O1    | P21/c       | 14     | O=C1NCCCCC2CCCCC12           | 0.00                                              | 0.226                                     | 0                 |
| NAHFOR      | C10 H9 F1       | Pnam        | 62     | FC12C=CC3C(C=C1)C3C=C2       | 0.00                                              | 0.079                                     | 0                 |



Table S3 (continued)

| CSD Refcode | Formula        | Space Group symbol | Space Group number | SMILES                                    | Energy rank $\Delta E(\text{CSP})$ / kJ/mol | RMSD <sub>30</sub> of CSP match / Å | Numerical rank |
|-------------|----------------|--------------------|--------------------|-------------------------------------------|---------------------------------------------|-------------------------------------|----------------|
| NAKHEP      | C8 H4 F1 N1 O3 | P21/c              | 14                 | <chem>Fc1ccc2OC(=O)NC(=O)c2c1</chem>      | 0.00                                        | 0.385                               | 0              |
| NALDOT      | C12 H14 O1     | P21/c              | 14                 | <chem>C1CC23OC(C=C2)C2(C2)C23CC12</chem>  | 3.36                                        | 0.378                               | 7              |
| NALDÜZ      | C12 H14 O2     | Pbca               | 61                 | <chem>C1OCC23OC(C=C2)C2(C2)C23CC12</chem> | 0.45                                        | 0.156                               | 1              |
| NAPCBU      | C12 H10        | P21/c              | 14                 | <chem>C1Cc2cc3ccccc3cc12</chem>           | 0.00                                        | 0.170                               | 0              |
| NAPCPR01    | C11 H8         | Pnma               | 62                 | <chem>C1c2cc3ccccc3cc12</chem>            | 0.00                                        | 0.262                               | 0              |
| NAPHQU01    | C10 H6 O2      | P21/c              | 14                 | <chem>O=C1C=CC(=O)c2ccccc12</chem>        | 2.83                                        | 0.775                               | 3              |
| NAPHTA39    | C10 H8         | P21/a              | 14                 | <chem>c1ccc2ccccc2c1</chem>               | 0.00                                        | 1.191                               | 0              |
| NAPOIM02    | C12 H7 N1 O2   | P21/n              | 14                 | <chem>O=C1NC(=O)c2ccc3ccccc1c23</chem>    | 0.48                                        | 2.310                               | 2              |
| NAPTAN01    | C12 H6 O3      | P212121            | 19                 | <chem>O=C1OC(=O)c2ccc3ccccc1c23</chem>    | 1.23                                        | 0.299                               | 3              |
| NAPTAN02    | C12 H6 O3      | P21/c              | 14                 | <chem>O=C1OC(=O)c2ccc3ccccc1c23</chem>    | 0.00                                        | 0.311                               | 0              |
| NAPTYR11    | C8 H6 N2       | P21/c              | 14                 | <chem>c1cnc2ncccc2c1</chem>               | 0.00                                        | 0.398                               | 0              |
| NARGEV      | C8 H12 O4      | P212121            | 19                 | <chem>C1OOC2(CCC3OCC2O3)O1</chem>         | 0.00                                        | 0.184                               | 0              |
| NAWTAI      | C8 H4 N2 O2    | P21/c              | 14                 | <chem>O1C=Nc2cc3OC=Nc3cc12</chem>         | 0.00                                        | 0.281                               | 0              |
| NBONAN01    | C9 H8 O3       | P212121            | 19                 | <chem>O=C1OC(=O)C2C3CC(C=C3)C12</chem>    | 0.00                                        | 0.215                               | 0              |
| NBORAN12    | C9 H8 O3       | P212121            | 19                 | <chem>O=C1OC(=O)C2C3CC(C=C3)C12</chem>    | 0.00                                        | 0.247                               | 0              |
| NEDDOR      | C7 H2 F4 N2 O1 | P21/c              | 14                 | <chem>Fc1c(F)c(F)c2C(=O)NNc2c1F</chem>    | 1.01                                        | 2.933                               | 1              |
| NEDDUX      | C7 H4 F2 N2 O1 | P21/n              | 14                 | <chem>Fc1ccc2C(=O)NNc2c1F</chem>          | 8.82                                        | 0.700                               | 145            |
| NEHQAU      | C4 H4 N2 O1    | P21/n              | 14                 | <chem>[O-][n+]1ccnc1</chem>               | 0.00                                        | 0.218                               | 0              |
| NENTUV      | C13 H12 O2     | P212121            | 19                 | <chem>C1COc2cc3ccccc3cc2OC1</chem>        | 0.00                                        | 0.205                               | 0              |
| NICREW      | C7 H8          | I41cd              | 110                | <chem>C1CC21C=CC=C2</chem>                | 0.00                                        | 0.187                               | 0              |
| NICRIA      | C7 H10         | P21                | 4                  | <chem>C1CC2(CC2)C=C1</chem>               | 3.73                                        | 0.291                               | 87             |
| NICROG      | C10 H12        | Pbca               | 61                 | <chem>C1CC21C=CC1(CCC1)C=C2</chem>        | 0.00                                        | 0.168                               | 0              |
| NIHZOT      | C12 H16 O2     | Pbca               | 61                 | <chem>O=C1CC2CCC1C13OC1CCCC23</chem>      | 2.93                                        | 0.209                               | 11             |
| NIKMEB      | C8 H12 O5      | P212121            | 19                 | <chem>C1OCC2OC3COCOC3C2O1</chem>          | 2.23                                        | 0.393                               | 4              |
| NIKVUZ      | C4 H4 O2       | P212121            | 19                 | <chem>O=C1OCC1=O</chem>                   | 3.03                                        | 0.279                               | 2              |
| NILYAI      | C4 H7 N1 O1    | P-1                | 2                  | <chem>O=C1OCCN1</chem>                    | 0.33                                        | 0.191                               | 1              |
| NIVZOH      | C9 H14 N2 O2   | P21/c              | 14                 | <chem>O=C1NC(=O)C2(CCCCCC2)N1</chem>      | 0.00                                        | 0.267                               | 0              |
| NIZVAU      | C8 H4 F1 N1 O2 | P21/c              | 14                 | <chem>Fc1ccc2C(=O)C(=O)Nc12</chem>        | 2.26                                        | 0.978                               | 9              |
| NODXAH      | C9 H10 O3      | P21/c              | 14                 | <chem>O=C1OCCCCC#CC(=O)OC1</chem>         | 0.36                                        | 0.245                               | 1              |

Table S3 (continued)

| CSD Refcode | Formula       | Space Group |        | SMILES                         | Energy rank<br>$\Delta E(\text{CSP})$<br>/ kJ/mol | RMSD <sub>30</sub><br>of CSP match<br>/ Å | Numerical<br>rank |
|-------------|---------------|-------------|--------|--------------------------------|---------------------------------------------------|-------------------------------------------|-------------------|
|             |               | symbol      | number |                                |                                                   |                                           |                   |
| NOJVIR      | C9 H10        | P212121     | 19     | C1C=CCC21C=CC=C2               | 0.50                                              | 0.128                                     | 2                 |
| NOJVOX      | C9 H8         | P21/c       | 14     | C1=CC2(C=C1)C=CC=C2            | 0.00                                              | 0.292                                     | 0                 |
| NOKKUU      | C12 H10 O2    | P-1         | 2      | O=C1CCCC2=C1Cc1cccc1O2         | 0.00                                              | 0.311                                     | 0                 |
| NOLDOJ01    | C3 H6 N6      | P21/n       | 14     | C1CNC2=NN=NN2N1                | 1.96                                              | 0.243                                     | 3                 |
| NOLJON      | C16 H14       | C2/m        | 12     | C1CC23C=CC4(CCc5ccc1c2c45)C=C3 | 0.00                                              | 0.146                                     | 0                 |
| NORFUX      | C9 H14 O3     | C2/c        | 15     | O=C1COC2CCCC2OC1               | 0.00                                              | 0.156                                     | 0                 |
| NORFUX01    | C9 H14 O3     | P21/n       | 14     | O=C1COC2CCCC2OC1               | 9.50                                              | 1.605                                     | 224               |
| NOSLIS      | C7 H8 O3      | Pnma        | 62     | O=C1OC2CC=CCC2O1               | 0.00                                              | 0.175                                     | 0                 |
| NOYWAZ      | C8 H8 O2      | C2/c        | 15     | O=C1C2CC3C1CC2C3=O             | 6.21                                              | 0.412                                     | 71                |
| NPDCBU      | C14 H12       | P-1         | 2      | C1Cc2cc3cc4CCc4cc3cc12         | 0.00                                              | 0.146                                     | 0                 |
| NTCHPE      | C14 H10       | Iba2        | 45     | c1cc2cccc3C4C5C4C5c(c1)c23     | 5.30                                              | 1.739                                     | 888               |
| NUHJUW      | C10 H6 N4     | P21/c       | 14     | c1cnc2nc3cccc3nc2c1            | 0.00                                              | 0.122                                     | 0                 |
| NUNLAJ      | C7 H12 O4     | Pbcn        | 60     | C1COC2(OC1)OCCCCO2             | 0.00                                              | 0.142                                     | 0                 |
| NUNLEN      | C9 H12 O4     | Pbcn        | 60     | C=C1COC2(OC1)OCC(=C)CO2        | 0.00                                              | 0.227                                     | 0                 |
| NUQPIZ      | C8 H12 O2     | P212121     | 19     | O=C1CC2CCCC(C2)O1              | 1.55                                              | 0.250                                     | 5                 |
| NURVUS      | C10 H14 O4    | P21/c       | 14     | O=C1OC2COC3(CCCCCO3)C1C2       | 0.00                                              | 0.280                                     | 0                 |
| NUTTIF      | C1 H2 N4 O1   | P41212      | 92     | O=C1NN=NN1                     | 15.56                                             | 0.594                                     | 469               |
| NUVZAF      | C10 H14 N2 O2 | P21/c       | 14     | O=C1NC2(CCC2)C(=O)NC21CCC2     | 0.00                                              | 0.354                                     | 0                 |
| OBEQUJ      | C6 H4 N2 O1   | Pbca        | 61     | [N]=N=C1C=CC=CC1=O             | 1.98                                              | 0.391                                     | 19                |
| OBIQUN      | C11 H11 N1 O2 | Fdd2        | 43     | O=C1N2CCOC2c2cccc12            | 2.08                                              | 0.150                                     | 13                |
| OICASV      | C6 H5 N3 O1   | P21/n       | 14     | O=C1NN=CC2=CC=CN12             | 0.00                                              | 0.428                                     | 0                 |
| OCSHYD      | C10 H16 N2 O2 | C2/c        | 15     | O=C1NC(=O)C2(CCCCCC2)N1        | 0.33                                              | 0.185                                     | 3                 |
| OCYDEO      | C9 H14 O3     | Pbca        | 61     | O=C1C(CCCC(=O)O)CCCC1          | 0.00                                              | 0.132                                     | 0                 |
| OGOWOW      | C16 H12       | P21/c       | 14     | C1c2cccc2C1=C1Cc2cccc12        | 0.00                                              | 0.285                                     | 0                 |
| OHILIC      | C10 H6 N2 O1  | P21/c       | 14     | O=C1N2C=CC=C2c2ncccc12         | 0.70                                              | 0.257                                     | 2                 |
| OHULAE      | C9 H10 O3     | P21nm       | 31     | O=C1OC2C3CCC(C=C3)C2O1         | 1.30                                              | 0.140                                     | 9                 |
| OLIXAK      | C12 H11 N1 O1 | P21/c       | 14     | O=C1N2CC=CC(C2)c2cccc12        | 1.70                                              | 0.427                                     | 2                 |
| OMEVOR      | C11 H7 N1 O1  | P21/n       | 14     | O1C=Nc1ccc1cccc21              | 1.94                                              | 0.167                                     | 1                 |
| OPIKUU      | C9 H10 O3     | P212121     | 19     | O=C1C(CCC21C=CC1)COC2O1        | 0.00                                              | 0.185                                     | 0                 |

Table S3 (continued)

| CSD Refcode | Formula       | Space Group symbol | Space Group number | SMILES                          | Energy rank $\Delta E(\text{CSP})$ / kJ/mol | RMSD <sub>30</sub> of CSP match / Å | Numerical rank |
|-------------|---------------|--------------------|--------------------|---------------------------------|---------------------------------------------|-------------------------------------|----------------|
| OPUSAU      | C6 H6 O4      | P21/m              | 11                 | O=C1OOC(=O)C21CCC2              | 3.41                                        | 0.160                               | 2              |
| OPUSEY      | C5 H4 O4      | Cmcm               | 63                 | O=C1OOC(=O)C21CC2               | 4.53                                        | 0.645                               | 2              |
| OPUSIC      | C7 H8 O4      | P21/c              | 14                 | O=C1OOC(=O)C21CCCC2             | 0.00                                        | 0.289                               | 0              |
| OSEXEQ      | C9 H6 N6      | P-1                | 2                  | C1=CN2C(=N1)N1C=CN=C1N1C=CN=C21 | 0.00                                        | 0.502                               | 0              |
| OSITER      | C8 H5 N1 O3   | P21/n              | 14                 | O=C1NC2=C(C=COC2=O)C=C1         | 1.01                                        | 0.601                               | 4              |
| OTOGEL      | C9 H8 O1      | Cc                 | 9                  | O=C1C2C=CC3C(C=C2)C13           | 7.22                                        | 0.196                               | 88             |
| OXAZDO      | C3 H3 N1 O3   | C2/c               | 15                 | O=C1CNC(=O)O1                   | 0.00                                        | 0.176                               | 0              |
| OXAZIL1     | C3 H5 N1 O2   | P21/c              | 14                 | O=C1NCCO1                       | 0.00                                        | 0.214                               | 0              |
| OXBOCT      | C5 H8 O3      | P21/c              | 14                 | C1OCC2OC2CO1                    | 0.38                                        | 0.191                               | 2              |
| OXETES      | C11 H13 N3    | P21/c              | 14                 | C1CCN2C(=Nc3ccccc23)NC1         | 2.45                                        | 0.366                               | 3              |
| OXHEPA03    | C8 H6 O4      | P212121            | 19                 | O=C1OC(=O)C2C3OC(C=C3)C12       | 0.32                                        | 0.178                               | 1              |
| PABRAL      | C11 H12 N2 O2 | C2/c               | 15                 | O=C1CN2CCOC2c2ccccc2N1          | 2.64                                        | 0.513                               | 3              |
| PAHYON      | C3 H4 N2 O2   | C2/c               | 15                 | O=C1CNC(=O)N1                   | 0.09                                        | 0.481                               | 1              |
| PAMTUS01    | C16 H16       | P21/n              | 14                 | C1Cc2ccccc2CCc2ccccc12          | 1.17                                        | 0.102                               | 2              |
| PARBAC03    | C3 H2 N2 O3   | P21/n              | 14                 | O=C1NC(=O)C(=O)N1               | 5.02                                        | 0.543                               | 38             |
| PAZDID      | C6 H9 N3 O1   | Pna21              | 33                 | O=C1NCCN2CCN=C12                | 5.19                                        | 0.365                               | 58             |
| PAZROZ      | C5 H6 O4      | P212121            | 19                 | O=C1OC2COCC2O1                  | 4.06                                        | 0.249                               | 1              |
| PCYDOL01    | C16 H12       | P21/c              | 14                 | C1=Cc2ccc(cc2)C=Cc2ccc1cc2      | 0.14                                        | 0.095                               | 8              |
| PECWIE      | C10 H12 O4    | P21                | 4                  | O=C1CC2CC3(CCC2O1)CC(=O)O3      | 0.52                                        | 0.559                               | 1              |
| PECWOK      | C10 H12 O4    | P21/n              | 14                 | O=C1CC2(CCC3(CCC2)CC(=O)O3)O1   | 0.00                                        | 0.131                               | 0              |
| PENSOR      | C10 H14 O4    | P21/c              | 14                 | C1COC2(CC3OCC4CC2OC34)O1        | 0.00                                        | 0.224                               | 0              |
| PERANT10    | C14 H24       | P21/c              | 14                 | C1CCC2CC3CCCC3CC2C1             | 4.26                                        | 0.161                               | 8              |
| PERLAA      | C7 H13 N3     | P-1                | 2                  | C1CCN2CCN=C2NC1                 | 1.21                                        | 0.176                               | 1              |
| PEWMIN      | C10 H18 O3    | P21/a              | 14                 | C1CCC2OCCOCCOC2C1               | 0.00                                        | 0.201                               | 0              |
| PEZFAE      | C12 H17 N1 O1 | P21/c              | 14                 | O=C1CC23CC4CC(CC(C4)C2N1)C3     | 0.00                                        | 0.199                               | 0              |
| PEZFIM      | C11 H11 N1 O1 | P212121            | 19                 | O=C1CC2C-c3ccccc3C2N1           | 0.00                                        | 0.326                               | 0              |
| PHALIM04    | C8 H5 N1 O2   | P21/n              | 14                 | O=C1NC(=O)c2ccccc12             | 1.55                                        | 0.206                               | 8              |
| PHENAN08    | C14 H10       | P21                | 4                  | c1ccc2c(c1)ccc1ccccc21          | 0.00                                        | 0.273                               | 0              |
| PHENAT02    | C13 H9 N1     | P212121            | 19                 | c1ccc2c(c1)cnc1ccccc21          | 0.00                                        | 0.268                               | 0              |

Table S3 (continued)

| CSD Refcode | Formula         | Space Group symbol | Space Group number | SMILES                                    | Energy rank $\Delta E(\text{CSP})$ / kJ/mol | RMSD <sub>30</sub> of CSP match / Å | Numerical rank |
|-------------|-----------------|--------------------|--------------------|-------------------------------------------|---------------------------------------------|-------------------------------------|----------------|
| PHENAZ04    | C12 H8 N2       | P21/n              | 14                 | <chem>c1ccc2nc3ccccc3nc2c1</chem>         | 0.00                                        | 1.193                               | 0              |
| PHENAZ11    | C12 H8 N2       | P21/n              | 14                 | <chem>c1ccc2nc3ccccc3nc2c1</chem>         | 1.88                                        | 0.104                               | 5              |
| PHTHAO      | C8 H4 O3        | Pna21              | 33                 | <chem>O=C1OC(=O)c2ccccc12</chem>          | 0.00                                        | 0.165                               | 0              |
| PHYPHM      | C8 H9 N1 O2     | P212121            | 19                 | <chem>O=C1NC(=O)C2CC=C(C)C12</chem>       | 0.00                                        | 0.632                               | 0              |
| PIGRAY      | C10 H14 O4      | P21/c              | 14                 | <chem>O=C1CC2OC3CCOC3CC2O1</chem>         | 0.00                                        | 0.513                               | 0              |
| PIGTUX      | C13 H14 F1 N1   | Pben               | 60                 | <chem>Fc1cccc2C3=C(C(C)C)C3Nc12</chem>    | 9.12                                        | 0.283                               | 35             |
| PIGWEK      | C12 H12 F1 N1   | C2/c               | 15                 | <chem>Fc1cccc2C3=C(C(C)C)C3Nc12</chem>    | 5.17                                        | 0.258                               | 9              |
| PIGWIO      | C12 H12 F1 N1   | P212121            | 19                 | <chem>Fc1ccc2C3=C(C(C)C)C3Nc2c1</chem>    | 1.17                                        | 0.196                               | 3              |
| PINNOP02    | C11 H6 N2 O1    | P21/c              | 14                 | <chem>O=C1c2ccccc2c1ncccc12</chem>        | 1.26                                        | 0.234                               | 1              |
| PINXAL      | C2 H2 N2 O2     | P21/n              | 14                 | <chem>[O]N1=CC=NO1</chem>                 | 2.27                                        | 0.929                               | 43             |
| PIWLEO      | C8 H12 F1 N1 O2 | P212121            | 19                 | <chem>FC1CCCC21COC(=O)N2</chem>           | 0.00                                        | 0.213                               | 0              |
| PLEIDN14    | C14 H10         | P21/c              | 14                 | <chem>C1=Cc2ccccc3cccc(C=C1)c23</chem>    | 1.33                                        | 0.230                               | 6              |
| POBXAI      | C6 H4 N2 O3     | P21/c              | 14                 | <chem>O=C1NC(=O)C2=COC=C2N1</chem>        | 3.36                                        | 1.845                               | 9              |
| POSQET      | C14 H18         | P-1                | 2                  | <chem>C1CC2C=C(C)C1C3CCC(C=C3)C21</chem>  | 0.19                                        | 0.240                               | 1              |
| POVZUW      | C10 H18         | P21/n              | 14                 | <chem>C1CCC2CCCCC2C1</chem>               | 0.00                                        | 0.211                               | 0              |
| PRELAN      | C14 H24         | C2/c               | 15                 | <chem>C1CCC23CCCCC2(C1)CCCC3</chem>       | 0.00                                        | 0.128                               | 0              |
| PRHDNA01    | C6 H8 N2 O2     | P212121            | 19                 | <chem>O=C1NC(=O)N2CCCC12</chem>           | 0.00                                        | 0.076                               | 0              |
| PRMDIN      | C4 H4 N2        | Pna21              | 33                 | <chem>c1cncnc1</chem>                     | 0.31                                        | 0.203                               | 2              |
| PRMDIN20    | C4 H4 N2        | P21/n              | 14                 | <chem>c1cncnc1</chem>                     | 1.81                                        | 0.299                               | 17             |
| PTERIDI1    | C6 H4 N4        | Pna21              | 33                 | <chem>c1cnc2ncnc2n1</chem>                | 0.00                                        | 0.215                               | 0              |
| PTOXEC      | C5 H10 O5       | Pben               | 60                 | <chem>C1OCOCOCOC1</chem>                  | 2.94                                        | 0.155                               | 3              |
| PUGDEB      | C6 H3 F3        | C2/c               | 15                 | <chem>Fc1cccc(F)c1F</chem>                | 0.00                                        | 0.761                               | 0              |
| PUMVOJ      | C8 H7 N1 O3     | P21/c              | 14                 | <chem>O=C1NC(=O)C2C3OC(C=C3)C12</chem>    | 3.84                                        | 0.385                               | 4              |
| PURINE      | C5 H4 N4        | Pna21              | 33                 | <chem>N1C=Nc2ncnc12</chem>                | 0.00                                        | 0.234                               | 0              |
| PVVAWA01    | C6 H3 F3        | I2/a               | 15                 | <chem>Fc1cc(F)cc(F)c1</chem>              | 0.22                                        | 0.911                               | 1              |
| PYMDON      | C4 H4 N2 O1     | P41212             | 92                 | <chem>O=C1NC=CC=N1</chem>                 | 8.47                                        | 0.247                               | 134            |
| PYPCPE      | C15 H11 N1      | Fdd2               | 43                 | <chem>c1cc2C=Cc3ccc(cc3)C=Cc(c1)n2</chem> | 0.00                                        | 0.145                               | 0              |
| PYRAZI      | C4 H4 N2        | Pmnn               | 58                 | <chem>c1cncnc1</chem>                     | 0.00                                        | 0.290                               | 0              |
| PYRAZI03    | C4 H4 N2        | P21/n              | 14                 | <chem>c1cncnc1</chem>                     | 0.00                                        | 0.400                               | 0              |

Table S3 (continued)

| CSD Refcode | Formula       | Space Group symbol | Space Group number | SMILES                        | Energy rank $\Delta E(\text{CSP})$ / kJ/mol | RMSD <sub>30</sub> of CSP match / Å | Numerical rank |
|-------------|---------------|--------------------|--------------------|-------------------------------|---------------------------------------------|-------------------------------------|----------------|
| PYRCEN      | C14 H12       | P21/n              | 14                 | C1Cc2ccc3CCc4ccc1c2c34        | 0.00                                        | 0.499                               | 0              |
| PYRDNO16    | C5 H5 N1 O1   | P41212             | 92                 | [O-][n+]1ccccc1               | 0.00                                        | 0.232                               | 0              |
| PYRENE10    | C16 H10       | P21/c              | 14                 | c1cc2ccc3ccccc4ccc(c1)c2c34   | 2.76                                        | 0.852                               | 25             |
| PYRIDO02    | C5 H5 N1 O1   | P212121            | 19                 | O=C1NC=CC=C1                  | 1.17                                        | 0.272                               | 4              |
| QAJY1J      | C5 H4 N4 O1   | Pna21              | 33                 | O=C1NC2=NC=NN2C=C1            | 2.03                                        | 0.217                               | 5              |
| QARVOV      | C4 H3 N1 O3   | P21/c              | 14                 | O=C1NC=CC(=O)O1               | 0.00                                        | 0.535                               | 0              |
| QEBFIM      | C14 H10 O1    | P212121            | 19                 | O1C2C=CC1c1cc3ccccc3ccc21     | 0.00                                        | 0.734                               | 0              |
| QEGSOL      | C8 H8 O3      | P41212             | 92                 | O1C2C3OC4C5OC(C1C35)C24       | 0.88                                        | 0.192                               | 1              |
| QEJQEC      | C14 H15 N1    | P212121            | 19                 | C1CCC2=C(C1)N1CCc3ccccc2c13   | 0.32                                        | 0.400                               | 1              |
| QEJQUS      | C13 H13 N1    | Pnma               | 62                 | C1CC2=C(C1)c1cccc3CCN2c13     | 6.09                                        | 0.299                               | 20             |
| QEKQIG      | C11 H14 N2 O2 | C2/c               | 15                 | C1CC2(CCC3CON=C23)C2=NOCC12   | 4.84                                        | 0.824                               | 16             |
| QELCEP01    | C12 H14 N2 O1 | Pbca               | 61                 | O=C1NC2(CCCC2)Ne2ccccc12      | 0.00                                        | 0.427                               | 0              |
| QIBCEK      | C12 H8 N2 O1  | C2/c               | 15                 | O=C1NN=Cc2c1ccc1ccccc21       | None                                        | None                                | None           |
| QIBCIO      | C12 H8 N2 O1  | C2/c               | 15                 | O=C1NN=Cc2ccc3ccccc3c12       | 0.00                                        | 0.227                               | 0              |
| QIBMUJ      | C13 H13 N1 O1 | P21/a              | 14                 | O=C1C=CC=CC2=C1NC1=C2CCCC1    | 6.58                                        | 0.220                               | 32             |
| QICTUU      | C12 H9 N1 O2  | Pc                 | 7                  | O=C1CCC(=O)C2=Cc3ccccc3N12    | 7.65                                        | 0.217                               | 152            |
| QICWOO      | C11 H9 N1 O2  | P21/n              | 14                 | O=C1NC(=O)C2C1Cc1ccccc21      | 1.43                                        | 0.263                               | 1              |
| QIFHES      | C11 H14 O2    | Pbca               | 61                 | O=C1CCC(=O)C2C3CCC(C3)C12     | 2.17                                        | 0.417                               | 13             |
| QISRUG      | C12 H12 O2    | Pbca               | 61                 | O=C1C2(CC=CC2)C(=O)C21CC=CC2  | 1.98                                        | 0.247                               | 2              |
| QIVGAE      | C8 H10 N2 O3  | P21/c              | 14                 | O=C1NC(=O)C2=C(C(CCCOC2)N1    | 3.10                                        | 0.737                               | 3              |
| QIWJEM      | C8 H8 O4      | Pna21              | 33                 | O=C1OC(=O)C2C3CCC(O3)C12      | 2.41                                        | 0.290                               | 16             |
| QOPYOK      | C8 H12 N2 O2  | P21/c              | 14                 | O=C1NC(=O)C2(CCCCOC2)N1       | 5.01                                        | 0.402                               | 3              |
| QOTWUR      | C11 H12 O4    | P212121            | 19                 | C1C2C3C4OC5OC6OC(O4)C2C6C1C35 | 0.00                                        | 0.160                               | 0              |
| QOTXAY      | C10 H10 O4    | Pnma               | 62                 | O1C2OC3OC4OC1C1C2C2C3C4C12    | 2.35                                        | 0.169                               | 8              |
| QQQAPG02    | C7 H12        | P21/m              | 11                 | C1CC2CCC1C2                   | 0.84                                        | 0.274                               | 4              |
| QQQCTS01    | C3 H6         | Cmc21              | 36                 | C1CC1                         | 0.52                                        | 0.345                               | 1              |
| QQQGMJ01    | C9 H8 O1      | P21/c              | 14                 | O=C1CCc2ccccc12               | 4.15                                        | 0.393                               | 25             |
| QUDREN      | C9 H12 O3     | P21                | 4                  | O=C1CC2OCOC3CC1C23            | 0.00                                        | 0.271                               | 0              |
| QUHFUW      | C6 H6 F6      | P21                | 4                  | FC1C(F)C(F)C(F)C(F)C1F        | 2.18                                        | 0.304                               | 1              |

Table S3 (continued)

| CSD Refcode | Formula       | Space Group |        | SMILES                                               | Energy rank<br>$\Delta E(\text{CSP})$<br>/ kJ/mol | RMSD <sub>30</sub><br>of CSP match<br>/ Å | Numerical<br>rank |
|-------------|---------------|-------------|--------|------------------------------------------------------|---------------------------------------------------|-------------------------------------------|-------------------|
|             |               | symbol      | number |                                                      |                                                   |                                           |                   |
| QUHZUO      | C12 H11 N1 O1 | P21/n       | 14     | O=C1CCCC2=C1Nc1ccccc21                               | 2.98                                              | 0.341                                     | 31                |
| QULNIV      | C9 H12 O2     | P6122       | 178    | O=C1CCC2CC1CCC2=O                                    | 2.40                                              | 0.149                                     | 7                 |
| QUYZIU      | C14 H16       | P-1         | 2      | C1CC2C=CC1C3C=CC(C21)C13CC1                          | 0.00                                              | 0.156                                     | 0                 |
| RAFSID      | C12 H16       | P-1         | 2      | C1CC2C1C1C2C2C3CC3C12                                | 0.00                                              | 0.846                                     | 0                 |
| RAVSOW      | C6 N6 O3      | P63/m       | 176    | O=C1C(=[N+]=[N-])C(=O)C(=[N+]=[N-])C(=O)C1=[N+]=[N-] | 0.00                                              | 0.070                                     | 0                 |
| REBCUX      | C7 H11 N3 O1  | P21/n       | 14     | O=C1NN=C2CCCCCN12                                    | 1.56                                              | 0.335                                     | 2                 |
| REJVAE01    | C5 H9 N3      | P21/c       | 14     | C1CN2CCN=C2N1                                        | 0.45                                              | 0.348                                     | 1                 |
| REJVEI      | C6 H11 N3     | C2/c        | 15     | C1CNC2=NCNC2C1                                       | 0.25                                              | 0.332                                     | 1                 |
| REQQUA      | C2 H3 N3 O1   | Pn          | 7      | O=C1NC=NN1                                           | 4.05                                              | 0.191                                     | 44                |
| RETTUG      | C8 H10 O4     | P21         | 4      | C1C2OC3OC3CC2OC2OC12                                 | 0.00                                              | 0.273                                     | 0                 |
| REVDIG      | C10 H12 O4    | P21/n       | 14     | C1COC2(O1)C=CC1(OCCO1)C=C2                           | 0.00                                              | 0.354                                     | 0                 |
| REWHIL      | C6 H8 N4 O1   | Pca21       | 29     | O=C1CCCCN2N=NN=C12                                   | 0.01                                              | 0.129                                     | 1                 |
| REWHOR      | C5 H6 N4 O1   | Pna21       | 33     | O=C1COCN2N=NN=C12                                    | 8.32                                              | 0.198                                     | 109               |
| REYRUK      | C13 H16 O2    | Pnaa21      | 33     | C=C1CC23CC1C(=O)CC2CCCC3=O                           | 1.75                                              | 0.149                                     | 1                 |
| REZVOK      | C7 H6 N2      | P212121     | 19     | N1C=Cc2cnccl2                                        | 1.21                                              | 0.774                                     | 3                 |
| RIGZAJ      | C10 H9 N1 O3  | P212121     | 19     | O=C1CCC2N1CC1=C(OCC=C1)C2=O                          | 1.96                                              | 0.322                                     | 2                 |
| RIJGAS      | C14 H22 O1    | P212121     | 19     | O=C1CCCC2CCC3CCCCC3C12                               | 0.00                                              | 0.181                                     | 0                 |
| RIPSER      | C12 H17 N1 O2 | P21/n       | 14     | O=C1CCCC2C(C1)C1CCCCN1C2=O                           | 2.60                                              | 0.300                                     | 8                 |
| RIQHEE      | C9 H12        | Pbca        | 61     | C1CC2C=CC1C12CC1                                     | 0.00                                              | 0.118                                     | 0                 |
| RIQHII      | C9 H10        | P21/c       | 14     | C1CC21C1C=CC2C=C1                                    | 0.00                                              | 0.200                                     | 0                 |
| RIQHOO      | C9 H14        | P21/n       | 14     | C1CC2CCC1C12CC1                                      | 0.41                                              | 0.362                                     | 2                 |
| RIQVOC      | C14 H20       | Pbca        | 61     | C1CCC#CCCCCCC#CCC1                                   | 0.00                                              | 0.258                                     | 0                 |
| RITNOY      | C5 F5 N1      | P21/c       | 14     | Fc1nc(F)c(F)c(F)c1F                                  | 0.00                                              | 0.825                                     | 0                 |
| ROHBUL      | C5 H8 N4 O2   | Pbca        | 61     | O=C1NC2CC(N1)NC(=O)N2                                | 0.00                                              | 0.306                                     | 0                 |
| ROPPEU      | C10 H12 O2    | P21/c       | 14     | O=C1C2CCCC1C1OC2C=C1                                 | 2.49                                              | 0.691                                     | 5                 |
| ROPPIY      | C9 H10 O2     | P21/c       | 14     | O=C1C2CCC1C1OC2C=C1                                  | 0.00                                              | 0.259                                     | 0                 |
| ROPPUK      | C11 H14 O1    | Pccn        | 56     | O=C1C2CCCC1C1CC2C=C1                                 | 1.65                                              | 0.147                                     | 2                 |
| ROTRAW      | C11 H12 N4    | P21/c       | 14     | C1Cc2cccc2CCC2=NN=NN12                               | 6.84                                              | 0.933                                     | 57                |
| RUFNUD      | C12 H16 O3    | Cc          | 9      | O=C1CCCC2=C1CC1CCCCOC1O2                             | 4.20                                              | 0.366                                     | 20                |

Table S3 (continued)

| CSD Refcode | Formula       | Space           | SMILES                       | Energy rank<br>$\Delta E(\text{CSP})$<br>/ kJ/mol | RMSD <sub>30</sub><br>of CSP match<br>/ Å | Numerical<br>rank |
|-------------|---------------|-----------------|------------------------------|---------------------------------------------------|-------------------------------------------|-------------------|
|             |               | Group<br>symbol |                              |                                                   |                                           |                   |
| RUHTET      | C9 H11 N1     | P21/c           | C1CC#CCNCC#CC1               | 0.00                                              | 0.239                                     | 0                 |
| RUHTEV      | C10 H12 O3    | Pbca            | O=C1OC2OCCCC32CC=CCC13       | 1.60                                              | 0.190                                     | 3                 |
| RUHTOD      | C8 H10 N2     | P21/n           | C1NCC#CCNCC#C1               | 1.34                                              | 0.344                                     | 1                 |
| RUJNOB      | C14 H10 N2    | C2/c            | C1N2c3ccccc3N=C2c2ccccc12    | 7.01                                              | 0.591                                     | 83                |
| RUJYIG      | C10 H6 N2 O1  | P21/c           | O=C1N2C=CC=C2c2ccccc12       | 1.10                                              | 0.290                                     | 5                 |
| RUNBAF      | C8 H10 O4     | Pca21           | O=C1CC2C3CCOC3OC2O1          | 0.00                                              | 0.111                                     | 0                 |
| RUVQHI      | C4 H5 N1      | Pmma            | N1C=CC=C1                    | 0.00                                              | 0.253                                     | 0                 |
| RUVXAH      | C8 H12 O2     | P21/n           | C1CC2OC1C1CCC2O1             | 0.00                                              | 0.162                                     | 0                 |
| RUVZEN      | C6 H7 N1 O1   | P212121         | O=C1NC2CC1C=C2               | 3.14                                              | 0.160                                     | 8                 |
| RUWHEW      | C12 H16 O2    | Pbca            | O=C1CCCC2C3CCCC(=O)C3C12     | 0.94                                              | 0.286                                     | 1                 |
| RUWHIA      | C12 H16 O2    | P21/n           | O=C1CCCC2C1C1CCCC(=O)C21     | 4.37                                              | 0.395                                     | 6                 |
| SACBAA02    | C1 O2         | Pca3            | O=C=O                        | 0.00                                              | 0.223                                     | 0                 |
| SADBII      | C10 H14 N2    | P21/c           | C1CC2C=CC1C1CCC2N=N1         | 0.00                                              | 0.158                                     | 0                 |
| SADHUA      | C7 H8         | P21/c           | C1CC2C34CC23C14              | 0.00                                              | 0.162                                     | 0                 |
| SADJEM      | C8 H10        | P21/c           | C1CC2C34CC23C4C1             | 0.00                                              | 0.166                                     | 0                 |
| SAJHIV      | C6 H7 N3 O1   | P21/n           | O=C1NCCCC2=CN=CN12           | 2.10                                              | 0.387                                     | 3                 |
| SALLIB      | C10 H13 N1 O1 | Pbca            | C1CC2CCC3=NOC(C=C1)C23       | 1.50                                              | 0.290                                     | 2                 |
| SALLOH      | C11 H15 N1 O1 | P21/c           | C1CC2CCC=CC3ON=C(C1)C23      | 0.00                                              | 0.072                                     | 0                 |
| SALMEY      | C10 H11 N1 O1 | P21/c           | C1CC2=NO3C=CC=CC1C23         | 2.57                                              | 0.193                                     | 4                 |
| SALMIC      | C11 H13 N1 O1 | P21/c           | C1CC2C=CC=CC3ON=C(C1)C23     | 0.00                                              | 0.159                                     | 0                 |
| SATCUL      | C4 H6 N2 O2   | P21/c           | O=C1NCCNC1=O                 | 5.78                                              | 0.214                                     | 13                |
| SATMIK      | C14 H16 O1    | P-1             | O=C1C2OCCCC2Ce2ccccc12       | 0.00                                              | 0.223                                     | 0                 |
| SAWZAS      | C12 H12 O2    | P21/c           | O=C1C2C3C4C=CCC4C(C23)C21CO2 | 0.54                                              | 0.158                                     | 1                 |
| SAYTER      | C11 H14 O2    | P21/n           | O=C1CCCCC23OC(C2)C=C3        | 0.24                                              | 0.401                                     | 1                 |
| SCPCBU01    | C12 H16       | P21/c           | C1CC2C1(C2)C1(C2)C12CC1      | 0.56                                              | 0.618                                     | 18                |
| SEGBUB      | C7 H12 O4     | P21/c           | C1OCC2(CO1)COCCO2            | 0.46                                              | 0.243                                     | 1                 |
| SEGCAI01    | C4 H6 O3      | P21/n           | O=C1OCCCCO1                  | 0.00                                              | 0.187                                     | 0                 |
| SELCAP      | C13 H12 O1    | P21/c           | O=C1CCCC#CCc2ccccc12         | 3.58                                              | 0.330                                     | 3                 |
| SELCE5      | C11 H9 N1 O3  | P21             | O=C1OC(=O)N2Cc3ccccc3CC12    | 0.00                                              | 0.239                                     | 0                 |

Table S3 (continued)

| CSD Refcode | Formula       | Space Group symbol | Space Group number | SMILES                                               | Energy rank $\Delta E(\text{CSP})$ / kJ/mol | RMSD <sub>30</sub> of CSP match / Å | Numerical rank |
|-------------|---------------|--------------------|--------------------|------------------------------------------------------|---------------------------------------------|-------------------------------------|----------------|
| SEMMEE      | C13 H13 N1    | P21                | 4                  | <chem>C1CCc2nc3ccccc3cc2C1</chem>                    | 0.00                                        | 0.170                               | 0              |
| SEMSEJ      | C11 H8 N2     | P21/n              | 14                 | <chem>N1c2ccccc2c2enccc12</chem>                     | 5.95                                        | 0.599                               | 45             |
| SEMSEJ01    | C11 H8 N2     | Pna21              | 33                 | <chem>N1c2ccccc2c2enccc12</chem>                     | 1.36                                        | 0.217                               | 3              |
| SEMVEL      | C16 H10       | P21/c              | 14                 | <chem>C12=C3C4=CC=C3C=CC=C1C=CC2=CC=C4 SEMVEL</chem> | 0.00                                        | 0.210                               | 0              |
| SIBJIX      | C7 H8 O3      | P212121            | 19                 | <chem>O=C1CC2C(CC3OC23)O1</chem>                     | 0.00                                        | 0.393                               | 0              |
| SIHVAG      | C8 H10 N2 O2  | C2/c               | 15                 | <chem>O=C1NC2(CC2)C(=O)NC21CC2</chem>                | 0.00                                        | 0.400                               | 0              |
| SINDNC      | C15 H12       | Pbca               | 61                 | <chem>C1=CC2C(C=C1)C12C=Cc2ccccc12</chem>            | 0.00                                        | 0.346                               | 1              |
| SISFUY      | C3 H2 N6      | P212121            | 19                 | <chem>C1=NN2C=NN=C2N=N1</chem>                       | 14.33                                       | 0.633                               | 386            |
| SIWFUZ      | C12 H8        | P21/n              | 14                 | <chem>C1c2cc3cc4Cc4cc3cc12</chem>                    | 0.85                                        | 0.303                               | 5              |
| SIZZUW      | C12 H7 F1 N2  | C2/c               | 15                 | <chem>Fc1ccc2nnc3ccccc3c2c1</chem>                   | 0.00                                        | 0.245                               | 0              |
| SOCHIB      | C10 H12 O3    | P21/c              | 14                 | <chem>O=C1CCCC2C3OC(CC3=O)C12</chem>                 | 0.00                                        | 0.234                               | 0              |
| SOFTEM      | C10 H10 O3    | P212121            | 19                 | <chem>O1C2C1C1C3OC3C3C4OC4C2C13</chem>               | 0.00                                        | 0.234                               | 0              |
| SOKPEP      | C8 H16 N4 O2  | P21/c              | 14                 | <chem>C1CN2NC3COCCN3NC2CO1</chem>                    | 3.55                                        | 0.267                               | 17             |
| SOWQOL      | C9 H9 N1 O1   | P21/c              | 14                 | <chem>O=C1NCCc2ccccc12</chem>                        | 2.38                                        | 0.228                               | 9              |
| SPIRDO      | C11 H14 O1    | P212121            | 19                 | <chem>O=C1C=CC2(COCC2)C=C1</chem>                    | 0.00                                        | 0.104                               | 0              |
| SPIROC      | C15 H20       | Pbca               | 61                 | <chem>C1CC2C1(CC1)C1(CC1)C1(CC1)C12CC1</chem>        | 7.05                                        | 0.431                               | 33             |
| STZPDZ10    | C5 H4 N4      | P21/c              | 14                 | <chem>C1=CC2=NN=CN2N=C1</chem>                       | 0.00                                        | 0.259                               | 0              |
| SUCANH12    | C4 H4 O3      | P212121            | 19                 | <chem>O=C1CCC(=O)O1</chem>                           | 0.00                                        | 0.142                               | 0              |
| SUCCIN03    | C4 H5 N1 O2   | Pbca               | 61                 | <chem>O=C1CCC(=O)N1</chem>                           | 1.29                                        | 0.219                               | 3              |
| SUKXEB      | C12 H12       | R-3c               | 167                | <chem>C12C3C1C1C4C2C2C3C1C1C2C41</chem>              | 0.00                                        | 0.130                               | 0              |
| SURHOC      | C11 H12 O1    | Pbca               | 61                 | <chem>O=C1C2=C1C0CCC#CCCC2</chem>                    | 0.00                                        | 0.162                               | 0              |
| SURSED      | C12 H20 N2    | P-1                | 2                  | <chem>C1CC2CC(C1)N1C3CCC(CC3)N21</chem>              | 3.02                                        | 0.295                               | 12             |
| SUSCOY      | C7 H4 F2      | Pbca               | 61                 | <chem>FC1(F)c2ccccc12</chem>                         | 1.22                                        | 0.187                               | 2              |
| SUSDAL      | C4 H6         | P21/c              | 14                 | <chem>C=C1CC1</chem>                                 | 1.82                                        | 0.348                               | 23             |
| SUVCUJ      | C11 H13 N1 O1 | P21/c              | 14                 | <chem>O=C1CCCCc2ccccc2N1</chem>                      | 0.00                                        | 0.123                               | 0              |
| SUVDAQ      | C11 H13 N1 O1 | Pbca               | 61                 | <chem>O=C1CCCCc2ccccc2CN1</chem>                     | 4.24                                        | 0.427                               | 18             |
| SUWGOC      | C16 H14       | P21/c              | 14                 | <chem>C1CC2c3ccccc3C1c1ccccc21</chem>                | 0.00                                        | 0.097                               | 0              |
| SUZGOK      | C11 H13 N3 O1 | Pbca               | 61                 | <chem>O=C1NC2(CCCC2)Nc2ncccc12</chem>                | 0.00                                        | 0.381                               | 0              |
| TADKUH      | C10 H10 N2 O1 | P212121            | 19                 | <chem>O=C1NC2C1NCc1ccccc21</chem>                    | 7.13                                        | 0.957                               | 39             |



Table S3 (continued)

| CSD Refcode | Formula        | Space Group symbol | Space Group number | SMILES                          | Energy rank $\Delta E(\text{CSP})$ / kJ/mol | RMSD <sub>30</sub> of CSP match / Å | Numerical rank |
|-------------|----------------|--------------------|--------------------|---------------------------------|---------------------------------------------|-------------------------------------|----------------|
| TAFKAM      | C4 H6 N4 O1    | P21/n              | 14                 | C1CNC2=NON=C2N1                 | 8.38                                        | 0.122                               | 46             |
| TAGQJB      | C11 H8 N2 O1   | P21/n              | 14                 | O=C1NC2cc3ccccc3cc2N1           | 5.62                                        | 1.270                               | 12             |
| TAGQOH      | C7 H4 F2 N2 O1 | P21/c              | 14                 | Fc1cc2NC(=O)Nc2cc1F             | 0.00                                        | 0.399                               | 0              |
| TANGUK01    | C11 H11 N1 O3  | P21/c              | 14                 | O=C1Nc2ccccc2C21OCCCO2          | 0.92                                        | 0.284                               | 1              |
| TANMAT      | C6 H8 O3       | P41212             | 92                 | C1OC2C3COCC2C1O3                | 1.89                                        | 0.154                               | 4              |
| TARZUH      | C9 H7 N3       | P21/n              | 14                 | N1c2ccccc2N2C=CN=C12            | 5.89                                        | 0.605                               | 15             |
| TAVPEN      | C16 H10        | P21/c              | 14                 | c1ccc2c(c1)C=C1c3ccccc3C=C21    | 0.00                                        | 1.088                               | 0              |
| TAVTUH      | C13 H16 O2     | P-1                | 2                  | C1CC2=C(C1)C1(OCCO1)C1=C2CCCC1  | 12.03                                       | 1.751                               | 795            |
| TAXNIR      | C13 H14 O2     | P21/n              | 14                 | O=C1CCc2ccc3OCCCCc3c12          | 0.00                                        | 0.158                               | 0              |
| TAXRIT      | C11 H6 O2      | P21/n              | 14                 | O=C1C=CC(=O)c2cc3Cc3cc12        | 1.70                                        | 0.364                               | 5              |
| TAZCAZ      | C8 H5 N5       | P21cn              | 33                 | c1cc2hncnc3nnc(c1)n23           | 1.19                                        | 0.222                               | 5              |
| TAZPYD10    | C5 H4 N4       | P21                | 4                  | C1=CC2=NC=NN2N=C1               | 0.00                                        | 0.300                               | 0              |
| TAZTCD01    | C8 H16 N4      | I-42m              | 121                | C1CN2CN3CCN(CN1C3)C2            | 0.70                                        | 0.643                               | 1              |
| TCDECA      | C12 H10 O3     | P21/c              | 14                 | O=C1OC(=O)C2C3C=CC(C4C=CC34)C12 | 0.12                                        | 0.202                               | 1              |
| TCDEDO10    | C12 H12 O2     | P21/c              | 14                 | O=C1C(=O)C2CC=CCC12CC=CC3       | 0.62                                        | 0.138                               | 1              |
| TCDEOC      | C10 H10 O2     | P21/n              | 14                 | O=C1CC2C3C=CCC(C13)C2=O         | 2.50                                        | 0.194                               | 9              |
| TCDEPX      | C12 H16 O2     | Pbca               | 61                 | C1CC23CCC41OC14COC2(CCC1)O3     | 2.11                                        | 0.385                               | 8              |
| TCDODO      | C13 H16 O2     | C2/c               | 15                 | O=C1CC2C3CCC(C3)C32CC1CC3=O     | 0.00                                        | 0.195                               | 0              |
| TCDODP      | C12 H12 O2     | P21/n              | 14                 | O=C1C2CC=CC3C4CC(C14)C(=O)C23   | 2.24                                        | 0.186                               | 6              |
| TCTDON      | C13 H18 O1     | P21/c              | 14                 | O=C1CC2CC3CC3CCCC(=C1)C23       | 0.00                                        | 0.100                               | 0              |
| TCUNDO      | C11 H14 O2     | P212121            | 19                 | O=C1C2CC3CC(C2)CC(C3)C1=O       | 2.18                                        | 0.237                               | 3              |
| TCUNDP      | C11 H16 O1     | P21/c              | 14                 | O=C1CC2CC3CC2C(C3)C1            | 0.00                                        | 0.143                               | 0              |
| TEKQAB01    | C4 H3 N1 O2    | C2/c               | 15                 | O=C1NC(=O)C=C1                  | 2.61                                        | 0.208                               | 21             |
| TEMCAP      | C6 H8 O2       | C2/m               | 12                 | C1C2CC3OC1C3O2                  | 0.00                                        | 0.133                               | 0              |
| TEOXDE      | C6 H12 O4      | P-1                | 2                  | C1COCCOCCOCCO1                  | 1.07                                        | 0.167                               | 3              |
| TETDAM08    | C6 H12 N2      | P63/m              | 176                | C1CN2CCN1CC2                    | 0.00                                        | 0.205                               | 0              |
| TETRAZ02    | C2 H2 N4       | P21/n              | 14                 | c1nncm1                         | 0.05                                        | 0.536                               | 1              |
| TETZOL02    | C1 H2 N4       | P1                 | 1                  | N1C=NN=N1                       | 0.00                                        | 0.815                               | 0              |
| TEVVUM      | C12 H12 O3     | P21/m              | 11                 | C=C1C2OC2C(=C)C2OC2C(=C)C2OC12  | 0.00                                        | 0.178                               | 0              |

Table S3 (continued)

| CSD Refcode | Formula       | Space Group symbol | Space Group number | SMILES                                   | Energy rank $\Delta E(\text{CSP})$ / kJ/mol | RMSD <sub>30</sub> of CSP match / Å | Numerical rank |
|-------------|---------------|--------------------|--------------------|------------------------------------------|---------------------------------------------|-------------------------------------|----------------|
| TEZPDZ10    | C4 H3 N5      | P21/n              | 14                 | <chem>C1=CC2=NN=NN2N=C1</chem>           | 0.00                                        | 0.097                               | 0              |
| TFBENQ02    | C6 F4 O2      | P21/c              | 14                 | <chem>FC1=C(F)C(=O)C(=C(F)C1=O)F</chem>  | 0.00                                        | 0.552                               | 0              |
| TFMETH02    | C1 F4         | C2/n               | 15                 | <chem>FC(F)(F)F</chem>                   | 4.40                                        | 1.332                               | 288            |
| TICJEU      | C16 H16       | P21/c              | 14                 | <chem>C1Cc2ccc3CCc4ccc(C1)c2c34</chem>   | 1.85                                        | 0.339                               | 8              |
| TIFK0J      | C11 H7 N1 O3  | Pbca               | 61                 | <chem>C=C1N2C(OC1=O)c1cccc1C2=O</chem>   | 0.00                                        | 0.124                               | 0              |
| TIFXOV      | C7 H10        | P21/m              | 11                 | <chem>C1CC(C1)=C1CC1</chem>              | 1.10                                        | 0.215                               | 2              |
| TIHWIQ      | C10 H12       | P-1                | 2                  | <chem>C1CC21CC2=C1CC21CC2</chem>         | 4.85                                        | 1.282                               | 90             |
| TIMCHX      | C6 H9 N3      | P21/c              | 14                 | <chem>N1C2C1C1NC1C1NC21</chem>           | 0.00                                        | 0.218                               | 0              |
| TIPVIZ      | C8 H7 N3      | P21/n              | 14                 | <chem>N=C1NC(=N)c2cccc12</chem>          | 13.01                                       | 0.644                               | 51             |
| TISMUG      | C13 H19 N1 O1 | P21/n              | 14                 | <chem>O=C1CCCCCCCCC2=C1C=CN2</chem>      | 1.07                                        | 0.392                               | 3              |
| TISNAN      | C13 H19 N1 O1 | P21/n              | 14                 | <chem>O=C1CCCCCCCCC2=CC=C1N2</chem>      | 0.00                                        | 0.315                               | 0              |
| TIXQEY      | C14 H8 N2     | P21/c              | 14                 | <chem>c1ccc2c(c1)N=C1c3cccc3N=C21</chem> | 1.68                                        | 0.418                               | 6              |
| TMENBZ02    | C15 H18       | P21/n              | 14                 | <chem>C1Cc2c(C1)c1CCc1c1CCc21</chem>     | 3.48                                        | 0.353                               | 8              |
| TOAZCD      | C5 H9 N1 O5   | P21/c              | 14                 | <chem>O=C1NCOCCOCCO1</chem>              | 0.00                                        | 0.157                               | 0              |
| TOHZUL      | C11 H12 O2    | P-1                | 2                  | <chem>O=C1CC2C3CC4C2CC(=O)C4C13</chem>   | 0.00                                        | 0.199                               | 0              |
| TOMCOP      | C11 H7 N1 O3  | Fdd2               | 43                 | <chem>O=C1ON=C2COc3cccc3C=C12</chem>     | 0.00                                        | 0.165                               | 0              |
| TORQIC      | C8 H7 N1 O1   | Pbca               | 61                 | <chem>O=C1CCc2ncccc12</chem>             | 2.62                                        | 0.167                               | 7              |
| TOXCDP      | C8 H16 O4     | P-1                | 2                  | <chem>C1COCCOCCOCCO1</chem>              | 2.88                                        | 0.256                               | 9              |
| TOXCTD      | C10 H20 O4    | P21/n              | 14                 | <chem>C1COCCOCCOCCOCCO1</chem>           | 3.76                                        | 0.469                               | 18             |
| TOXDEC      | C6 H10 O4     | C2/c               | 15                 | <chem>C1COCCOCCOCCO1</chem>              | 0.00                                        | 0.111                               | 0              |
| TOXOCN      | C4 H8 O4      | C2/c               | 15                 | <chem>C1OCOCOCO1</chem>                  | 1.34                                        | 0.781                               | 4              |
| TOXSTD      | C10 H16 O4    | P21/c              | 14                 | <chem>C1COCC2(CCC3(CO2)OCCO3)O1</chem>   | 1.35                                        | 0.166                               | 5              |
| TOXTDC      | C10 H20 O4    | P21/n              | 14                 | <chem>C1COCCOCCOCCOCCO1</chem>           | 0.50                                        | 0.151                               | 2              |
| TOYSIL      | C4 F4 N2      | Pna21              | 33                 | <chem>Fc1nc(F)c(F)c(F)n1</chem>          | 2.54                                        | 0.123                               | 1              |
| TRAZOL02    | C2 H3 N3      | Pbca               | 61                 | <chem>N1C=NC=N1</chem>                   | 0.35                                        | 0.204                               | 2              |
| TRIZIN      | C3 H3 N3      | R-3c               | 167                | <chem>c1ncnc1</chem>                     | 0.00                                        | 0.136                               | 0              |
| TRIZIN05    | C3 H3 N3      | C2/c               | 15                 | <chem>c1ncnc1</chem>                     | 0.00                                        | 0.393                               | 0              |
| TROXANI1    | C3 H6 O3      | R3c                | 161                | <chem>C1OCOCO1</chem>                    | 0.41                                        | 0.130                               | 1              |
| TRQUIN      | C10 H10       | R-3                | 148                | <chem>C1=CC2C=CC3C=CC1C23</chem>         | 0.00                                        | 0.089                               | 0              |

Table S3 (continued)

| CSD Refcode | Formula        | Space Group symbol | Space Group number | SMILES                       | Energy rank $\Delta E(\text{CSP})$ / kJ/mol | RMSD <sub>30</sub> of CSP match / Å | Numerical rank |
|-------------|----------------|--------------------|--------------------|------------------------------|---------------------------------------------|-------------------------------------|----------------|
| TSCPCP02    | C9 H12         | P63/m              | 176                | C1CC21C1(CC1)C12CC1          | 0.00                                        | 0.068                               | 0              |
| TUCNIQ      | C11 H12 O3     | P21/c              | 14                 | O=C1C2CC3COCC3(C=C2)C21CO2   | 1.99                                        | 0.279                               | 2              |
| TUGQAP      | C13 H9 N3      | P21/n              | 14                 | c1ccc2N3C=CN=C3C3=CC=CN3c2c1 | 0.00                                        | 0.230                               | 0              |
| TUNWUV      | C10 H9 N1 O3   | P21/c              | 14                 | O=C1Nc2ccccc2C21OCCO2        | 9.55                                        | 1.103                               | 55             |
| TUNYUY      | C8 H10 N2 O2   | P212121            | 19                 | O=C1C2CCN2C(=O)C2CCN12       | 0.00                                        | 0.333                               | 0              |
| TUVWOX      | C11 H8 O2      | P-1                | 2                  | O=C1OC2Cc3ccccc3C2=C1        | 2.14                                        | 0.321                               | 1              |
| TUWWUD      | C9 H5 F2 N1 O1 | Pmma               | 62                 | FC1(F)C(=O)C=Cc2hcccc12      | 0.00                                        | 0.194                               | 0              |
| TXBNON      | C6 H8 O4       | P21/c              | 14                 | O=C1CC2OCCOC2O1              | 0.00                                        | 0.166                               | 0              |
| TXCTDD      | C10 H16 O4     | P21/c              | 14                 | C1OCC=CCOCCO=CCO1            | 3.05                                        | 0.385                               | 11             |
| TXTATD      | C9 H15 N1 O3   | P21/c              | 14                 | C1CC2OCC3OCC(C(O1)N23        | 0.00                                        | 0.107                               | 0              |
| UCICIV      | C12 H12 O2     | P21/n              | 14                 | O=C1CC2CC1C1C=CC=CC2C1=O     | 0.00                                        | 0.222                               | 0              |
| UDALIV      | C4 H12 N6      | P21/n              | 14                 | C1NNCN2CNNCN12               | 0.00                                        | 0.357                               | 0              |
| UDEXUZ      | C8 H9 F1 O5    | P212121            | 19                 | FC1OCOC21OC1CC(=O)OC21       | 7.41                                        | 0.725                               | 18             |
| UFEMEX      | C10 H8 O2      | P21/c              | 14                 | O=C1C=CC2C3C=CC(C12)C3=O     | 1.76                                        | 0.182                               | 11             |
| UFYIUD      | C5 H6 N2 O3    | P212121            | 19                 | O=C1NC2COC(=O)C2N1           | 5.30                                        | 0.504                               | 7              |
| UHACIP      | C9 H10 O4      | P212121            | 19                 | O=C1CC23CCCC2(CC(=O)O3)O1    | 0.00                                        | 0.183                               | 0              |
| ULIMEH      | C11 H14 O2     | C2/c               | 15                 | O=C1CC2OC3C1CCCCC3=C2        | 2.06                                        | 0.329                               | 6              |
| UMERAF      | C9 H12 N4      | P21/n              | 14                 | C1C2N=NC3CC4N=NC1C4CC23      | 0.86                                        | 0.132                               | 5              |
| UMILUZ      | C9 H6 O2       | P21/n              | 14                 | O=C1C=COc2ccccc12            | 3.53                                        | 0.559                               | 38             |
| UMIMIO      | C9 H5 F1 O2    | P1                 | 1                  | Fc1ccc2OC=CC(=O)c2c1         | 0.00                                        | 0.397                               | 0              |
| UNDECO      | C11 H20 O1     | P21/c              | 14                 | O=C1CCCCCCCCCCC1             | 1.46                                        | 0.308                               | 6              |
| UNEFEA      | C14 H10 N2     | P21/c              | 14                 | N1c2ccccc2C2=C1c1ccccc1N2    | 0.27                                        | 0.376                               | 1              |
| UQJLOW      | C11 H10 N2 O1  | P21                | 4                  | C1OCC2=Nc3ccccc3N2C=C1       | 0.00                                        | 0.661                               | 0              |
| URACIL      | C4 H4 N2 O2    | P21/a              | 14                 | O=C1NC=CC(=O)N1              | 1.34                                        | 0.241                               | 18             |
| URAZIX      | C9 H8 O2       | P21/c              | 14                 | O=C1CCOe2ccccc12             | 0.69                                        | 0.184                               | 1              |
| URICAC      | C5 H4 N4 O3    | P21/a              | 14                 | O=C1NC(=O)C2=C(N1)NC(=O)N2   | 8.24                                        | 0.957                               | 105            |
| UTUSUZ      | C9 H6 O4       | P21/n              | 14                 | O=C1OCc2cc3OCCOe3cc12        | 0.00                                        | 0.365                               | 0              |
| UWUYAO      | C9 H13 N1 O1   | P-1                | 2                  | O=C1NC2CC2C2CCC12            | 0.00                                        | 0.270                               | 0              |
| UXAZID      | C4 H3 N5       | P21/c              | 14                 | C1=CN2N=NN=C2N=C1            | 0.34                                        | 0.229                               | 2              |

Table S3 (continued)

| CSD Refcode | Formula       | Space Group |        | SMILES                       | Energy rank<br>$\Delta E(\text{CSP})$<br>/ kJ/mol | RMSD <sub>30</sub><br>of CSP match<br>/ Å | Numerical<br>rank |
|-------------|---------------|-------------|--------|------------------------------|---------------------------------------------------|-------------------------------------------|-------------------|
|             |               | symbol      | number |                              |                                                   |                                           |                   |
| UZIKEV      | C11 H11 N1 O1 | Pbca        | 61     | O=C1CCc2cccc3CCN1c23         | 4.41                                              | 0.360                                     | 35                |
| UZOV0V      | C11 H12 O3    | Aba2        | 41     | O=C1OC23CC=CCC2(CC=CC3)O1    | 1.65                                              | 0.049                                     | 5                 |
| UZOVUB      | C11 H16 O3    | C2221       | 20     | O=C1OC23CCCCC2(CCCC3)O1      | 0.73                                              | 0.125                                     | 2                 |
| UZOWAI      | C11 H8 O3     | C2/c        | 15     | O=C1OC23C=CC=CC2(O1)C=CC=C3  | 0.37                                              | 0.345                                     | 1                 |
| VACCEH      | C6 H8         | Pbca        | 61     | C1C=CCC=C1                   | 0.20                                              | 0.115                                     | 1                 |
| VAJDIT      | C12 H16 O2    | C2/c        | 15     | O=C1CC2CCCC(=O)C32CCCC13     | 0.00                                              | 0.492                                     | 0                 |
| VAJGOC      | C5 H8         | R-3         | 148    | C1CC21CC2                    | 1.47                                              | 0.212                                     | 26                |
| VAJGUI      | C7 H10        | Pbcn        | 60     | C1CC2CC32CC13                | 0.00                                              | 0.284                                     | 0                 |
| VAJHAP      | C11 H10       | P21/c       | 14     | C1C23cccc3C3CC123            | 2.38                                              | 0.237                                     | 9                 |
| VAKJOG      | C8 H6 N2 O2   | P21         | 4      | [O]N1C=CN([O])c2cccc12       | 0.00                                              | 0.697                                     | 0                 |
| VALZIR      | C9 H8         | C2/c        | 15     | C1Cc2cc3Cc3ccl2              | 1.25                                              | 0.232                                     | 6                 |
| VAMZIT01    | C10 H10       | P21/n       | 14     | C1=CC2C3C4C1C1C2C3C41        | 0.96                                              | 0.254                                     | 5                 |
| VANLAX      | C10 H10 O4    | P21/c       | 14     | O=C1CC2OC3=C(C2O1)C(=O)CCCC3 | 1.73                                              | 0.241                                     | 1                 |
| VANYEO      | C8 H6 O2      | P-1         | 2      | O=C1C=CC2C1C=CC2=O           | 3.34                                              | 0.260                                     | 14                |
| VARYUI      | C15 H18       | P21/n       | 14     | C12CC3CC1CC(C2)C3=C1C=CC=C1  | 1.45                                              | 0.156                                     | 4                 |
| VARZOD      | C13 H16 O1    | P212121     | 19     | O=C1CCCC(CCC1)=C1C=CC=C1     | 4.92                                              | 0.290                                     | 13                |
| VATXAP      | C12 H19 N1 O2 | P21/n       | 14     | O=C1NC2(CCCC2)OC2CCCCC12     | 2.18                                              | 0.373                                     | 4                 |
| VAWFUX      | C11 H8 N2     | Ia          | 9      | N1c2cccc2c2ncccc12           | 0.00                                              | 0.225                                     | 0                 |
| VAWTOE      | C10 H12 O3    | C2/c        | 15     | O=C1CC2OCCC=CCCCC23O1        | 2.03                                              | 0.102                                     | 1                 |
| VEBFIR      | C8 H11 N1 O2  | P21cn       | 33     | O=C1CCN2CC1CCC2=O            | 1.35                                              | 0.242                                     | 10                |
| VEDTON      | C12 H14 O2    | C2/c        | 15     | O=C1CCC2C3C4C2CC(=O)C4C13    | 0.13                                              | 0.195                                     | 1                 |
| VEFCAK      | C14 H16       | P21/c       | 14     | C1CC=C2C(=CC1)C1=CCCC=C21    | 0.00                                              | 0.160                                     | 0                 |
| VEHCET      | C6 H8 F4      | P21/n       | 14     | FC1CC(F)C(F)CC1F             | 1.09                                              | 0.282                                     | 1                 |
| VENYUI      | C12 H12       | Pbcn        | 60     | C=C1C2C3C2C(=C)C2C1C2C3=C    | 0.00                                              | 0.099                                     | 0                 |
| VENZAP      | C9 H6 O3      | Pbcn        | 60     | O=C1C2C3C2C(=O)C2C1C2C3=O    | 0.00                                              | 0.218                                     | 0                 |
| VEXPJ01     | C10 H8 O2     | P21/n       | 14     | O1C2C3OC3c3cccc3C12          | 0.00                                              | 0.196                                     | 0                 |
| VEYYII      | C9 H10 O3     | P21/c       | 14     | O=C1CCCC23CCC(=O)C12O3       | 0.32                                              | 0.294                                     | 1                 |
| VEYYUU      | C11 H20 O2    | P21/c       | 14     | C1CCCCC2(CCC1)OCCO2          | 0.85                                              | 0.261                                     | 1                 |
| VICPAY      | C16 H14       | P21/n       | 14     | C1C2Cc3cccc3C2c2cccc12       | 6.56                                              | 0.345                                     | 59                |

Table S3 (continued)

| CSD Refcode | Formula        | Space Group symbol | Space Group number | SMILES                                       | Energy rank $\Delta E(\text{CSP})$ / kJ/mol | RMSD <sub>30</sub> of CSP match / Å | Numerical rank |
|-------------|----------------|--------------------|--------------------|----------------------------------------------|---------------------------------------------|-------------------------------------|----------------|
| VIDHAR10    | C8 H10 N2 O2   | P21/n              | 14                 | <chem>O=C1NC(=O)N2CCC3CC1C23</chem>          | 5.32                                        | 0.342                               | 31             |
| VIGKUT      | C12 H6 O3      | C2/c               | 15                 | <chem>O1C=C2C(=C1)C1=COC=C1C1=COC=C21</chem> | 1.32                                        | 0.258                               | 2              |
| VIGTUA      | C12 H8 N2      | P21/n              | 14                 | <chem>c1ccc2nc3C4C5C4C5c3nc2c1</chem>        | 7.41                                        | 0.216                               | 71             |
| VIHJUR      | C12 H11 N3     | P21/c              | 14                 | <chem>C1C2NC3=Nc4cccc4N3C1C=C2</chem>        | 0.75                                        | 0.476                               | 3              |
| VIKNAE      | C10 H10 O4     | P21/a              | 14                 | <chem>O=C1CCCC(O)OC(=O)C1CC=CC21</chem>      | 1.77                                        | 0.326                               | 2              |
| VILQOY      | C12 H14 O2     | P21/n              | 14                 | <chem>O=C1CC23C=CC1CC2CCCC3=O</chem>         | 0.00                                        | 0.151                               | 0              |
| VINGOO      | C9 H16 O2      | Pbca               | 61                 | <chem>O=C1CCCCCCCCO1</chem>                  | 0.00                                        | 0.069                               | 0              |
| VINSAN      | C8 H3 F4 N1    | C2/c               | 15                 | <chem>FC1=C(F)C2=CNC=C2C(=C1F)F</chem>       | 0.00                                        | 0.168                               | 0              |
| VIXXUZ      | C11 H11 N1 O1  | P212121            | 19                 | <chem>O=C1CC2C3cccc3C2N1</chem>              | 0.00                                        | 0.339                               | 0              |
| VOBJAX      | C8 H12 O4      | P212121            | 19                 | <chem>O=C1CCOC2(COCCO2)C1</chem>             | 0.00                                        | 0.313                               | 0              |
| VOBJEB      | C4 H4 N2       | P21/n              | 14                 | <chem>c1ccmnc1</chem>                        | 0.28                                        | 0.969                               | 4              |
| VOPHEN      | C14 H16        | P21/c              | 14                 | <chem>C1CC21C(=C1C3(CC3)C31CC3)C12CC1</chem> | 2.53                                        | 0.377                               | 4              |
| VOPJOB      | C7 H2 F4 N2 O1 | P21/c              | 14                 | <chem>Fe1c(F)c(F)c2NC(=O)Nc2c1F</chem>       | 2.26                                        | 2.111                               | 6              |
| VOPPAU      | C11 H8 O2      | P-1                | 2                  | <chem>O=C1CCC2=C1c1cccc1O2</chem>            | 0.50                                        | 0.200                               | 1              |
| VORSUQ      | C8 H10         | Pbca               | 61                 | <chem>C=C1C=CCC21CC2</chem>                  | 0.00                                        | 0.170                               | 0              |
| VOXLOJ      | C14 H8 O2      | P21/n              | 14                 | <chem>O1C=Cc2ccc3OC=Cc4ccc1c2c34</chem>      | 0.00                                        | 0.263                               | 0              |
| VUXQAI      | C7 H10 O5      | C2221              | 20                 | <chem>C1OCC2OC3OCC3C2O1</chem>               | 0.00                                        | 0.356                               | 0              |
| WACYAB      | C12 H16 O2     | C2/c               | 15                 | <chem>C1C=CCC2OC2CC=CCC2OC12</chem>          | 9.81                                        | 0.721                               | 150            |
| WACYEF      | C12 H16 O3     | P21                | 4                  | <chem>C1C=CCC2OC2CC2OC2CC2OC12</chem>        | 10.06                                       | 0.975                               | 70             |
| WAFHAO01    | C4 H2 N2 O4    | P21/n              | 14                 | <chem>O=C1NC(=O)C(=O)NC1=O</chem>            | 4.92                                        | 0.748                               | 9              |
| WAHBOX      | C5 H4 N4 O2    | P-1                | 2                  | <chem>O=C1NC(=O)N2C=NC=C2N1</chem>           | 4.37                                        | 0.292                               | 12             |
| WAPTOW      | C11 H16 N2     | P21/n              | 14                 | <chem>C1CC2CC1N1C3CC(C=C3)N21</chem>         | 0.00                                        | 0.218                               | 0              |
| WAPTUC      | C11 H18 N2     | P21/n              | 14                 | <chem>C1CC2CCC1N1C3CCC(C3)N21</chem>         | 0.00                                        | 0.321                               | 0              |
| WAPVAK      | C12 H20 N2     | P21/c              | 14                 | <chem>C1CC2CCC(C1)N1C3CC(C3)N21</chem>       | 0.00                                        | 0.210                               | 0              |
| WAPVIS      | C13 H22 N2     | P21/n              | 14                 | <chem>C1CC2CCC(C1)N1C3CCC(CC3)N21</chem>     | 0.00                                        | 0.309                               | 0              |
| WARPOW      | C10 H7 N3 O1   | P21/n              | 14                 | <chem>N1c2ncccc2Oe2ccnc12</chem>             | 0.11                                        | 0.565                               | 1              |
| WAXBOO      | C11 H14 N2 O1  | P21/c              | 14                 | <chem>C1CN2CCO3cccc3C2N1</chem>              | 0.00                                        | 0.454                               | 0              |
| WECCEO      | C8 H10 N2 O2   | P21/c              | 14                 | <chem>O=C1C(=O)C2=C1NCCCNC2</chem>           | 0.00                                        | 0.217                               | 0              |
| WEHYAK      | C4 H5 N1 O3    | P21/n              | 14                 | <chem>O=C1COC(=O)CN1</chem>                  | 0.10                                        | 0.189                               | 1              |

Table S3 (continued)

| CSD Refcode | Formula        | Space Group symbol | Space Group number | SMILES                             | Energy rank $\Delta E(\text{CSP})$ / kJ/mol | RMSD <sub>30</sub> of CSP match / Å | Numerical rank |
|-------------|----------------|--------------------|--------------------|------------------------------------|---------------------------------------------|-------------------------------------|----------------|
| WEMWAN      | C11 H16 O2     | P41212             | 92                 | O=C1CCCC2CC1CCCC2=O                | 0.00                                        | 0.293                               | 0              |
| WEPZOJ      | C9 H6 N4 O2    | P21/n              | 14                 | O=C1NNC(=O)c2cc3N=CNc3cc12         | 0.00                                        | 0.199                               | 0              |
| WEXREY      | C6 H5 N3       | Pna21              | 33                 | N1C=Nc2ncccc12                     | 0.00                                        | 0.281                               | 0              |
| WIGBOE      | C10 H18 N4     | P21/n              | 14                 | C1CN2CCN3CCN4CCN1C2C34             | 0.00                                        | 0.222                               | 0              |
| WIGYIV      | C8 H6 N2 O1    | P21/c              | 14                 | O=C1NN=Cc2cccc12                   | 1.17                                        | 0.235                               | 1              |
| WIKCAU      | C5 H4 O2       | Pna21              | 33                 | O=C1OC=CC=C1                       | 2.41                                        | 0.473                               | 35             |
| WIPVEW      | C12 H12 O2     | P21212             | 18                 | O=C1C2=C1CCCC1=C(CCC2)C1=O         | 0.14                                        | 0.777                               | 3              |
| WIXYUY      | C12 H14 O2     | P21/n              | 14                 | C1CC2(C1)COc1cccc1OC2              | 0.00                                        | 0.186                               | 0              |
| WOCGOK      | C8 H4 F1 N1 O2 | P21/c              | 14                 | Fc1ccc2NC(=O)C(=O)c2c1             | 0.00                                        | 0.273                               | 0              |
| WOLGOV      | C10 H9 N1 O4   | P212121            | 19                 | O=C1CC2C3C(C1CC2=O)C(=O)NC3=O      | 1.42                                        | 0.478                               | 4              |
| WUDJOU      | C14 H16 O1     | P21/c              | 14                 | O=C1C2(CC2)C2(CC2)C21C1(CC1)C12CC1 | 0.20                                        | 0.379                               | 1              |
| WUDJUA      | C10 H12 O2     | P-1                | 2                  | O=C1CCCC2(O1)C1(CC1)C12CC1         | 1.12                                        | 0.923                               | 3              |
| WUTSEJ      | C7 H8 O2       | P21/c              | 14                 | O=C1CC2OC(C1)C=C2                  | 2.21                                        | 0.121                               | 8              |
| XAMRUJ      | C11 H14 N2 O2  | P21/n              | 14                 | O=C1OCCCN2C=C3CC1CCC3=N2           | 0.00                                        | 0.170                               | 0              |
| XAMZIV      | C10 H10 O3     | P212121            | 19                 | O1C2C1C1C3C4OC4C2C2OC2C13          | 0.00                                        | 0.247                               | 0              |
| XAYMIT      | C10 H6 N4      | P212121            | 19                 | clenc2c(ccc3hcncc23)n1             | 0.00                                        | 0.164                               | 0              |
| XDHURC      | C3 H4 N2 O3    | P212121            | 19                 | O=C1CONC(=O)N1                     | 2.47                                        | 0.192                               | 14             |
| XENSAL      | C9 H10 O2      | P212121            | 19                 | O=C1C2C3COC(C=C2)C13               | 0.00                                        | 0.233                               | 0              |
| XERBEB      | C3 H3 N3 O2    | Pbca               | 61                 | O=C1NC=NC(=O)N1                    | 0.00                                        | 0.369                               | 0              |
| XESTUM      | C13 H10 N2     | P21/c              | 14                 | C1CC21c1ccnc1c1ncccc21             | 0.00                                        | 0.186                               | 0              |
| XEZHAL      | C12 H10 O2     | Pbca               | 61                 | O=C1C2C=CC(C3C2C2C4C3C24)C1=O      | 0.00                                        | 0.111                               | 0              |
| XIHYOD      | C13 H12 O2     | P21/c              | 14                 | O=C1C=CC2C3C=CC4(CCCC124)C3=O      | 0.00                                        | 0.251                               | 0              |
| XIWDDW      | C8 H14 N2 O4   | P21                | 4                  | O=C1COCC(=O)NCCOCCN1               | 0.00                                        | 0.233                               | 0              |
| XOFTER      | C8 H12 N2 O2   | C2/c               | 15                 | O=C1CCCC2NC(=O)CCC2N1              | 1.66                                        | 0.537                               | 7              |
| XOLQOF      | C10 H6 N2 O2   | P21/n              | 14                 | O=C1N2C=CC=C2C(=O)N2C=CC=C12       | 0.00                                        | 0.259                               | 0              |
| XOQLOF      | C9 H4 F3 N1    | P21/n              | 14                 | Fc1cc(F)c2ncccc2c1F                | 0.00                                        | 0.117                               | 0              |
| XOQLUL      | C9 H5 F2 N1    | Pc                 | 7                  | Fc1cc(F)c2ccnc2c1                  | 0.04                                        | 0.698                               | 1              |
| XUGHUD      | C8 H6 N2 O1    | P-1                | 2                  | [NH2+]=C1[N-]C(=O)c2cccc12         | 0.00                                        | 1.745                               | 0              |
| XUGHU01     | C8 H6 N2 O1    | P21/n              | 14                 | N=C1NC(=O)c2cccc12                 | None                                        | None                                | None           |

Table S3 (continued)

| CSD Refcode | Formula       | Space Group symbol | Space Group number | SMILES                         | Energy rank $\Delta E(\text{CSP})$ / kJ/mol | RMSD <sub>30</sub> of CSP match / Å | Numerical rank |
|-------------|---------------|--------------------|--------------------|--------------------------------|---------------------------------------------|-------------------------------------|----------------|
| XULDUD      | C6 H6 O1      | Pbca               | 61                 | C1CC2=COC=C12                  | 0.27                                        | 0.170                               | 3              |
| XURWIS      | C10 H12 O3    | P21/n              | 14                 | O=C1CC2CCCC3OC(=O)C1C23        | 0.00                                        | 0.377                               | 0              |
| XUZSUM      | C8 H8 O2      | P212121            | 19                 | O=C1CC2C3OC(C=C3)C12           | 1.02                                        | 0.199                               | 2              |
| XZBTZO      | C8 H4 N4 O2   | Pbca               | 61                 | [O-]C1=C2N=Nc3cccc3[N+]=2=NO1  | 2.07                                        | 0.199                               | 1              |
| YAPMEI      | C8 H10        | Pna21              | 33                 | C=C1C2(CC2)C21CC2              | 0.00                                        | 0.182                               | 0              |
| YAXQAS      | C12 H9 N1 O2  | P21/n              | 14                 | O=C1NC2=C(CCc3cccc23)C1=O      | 3.23                                        | 0.340                               | 5              |
| YAZKOZ      | C10 H18 N2 O2 | P21/c              | 14                 | O=C1CCCCC(=O)NCCCCN1           | 1.81                                        | 0.779                               | 6              |
| YEHHEY      | C10 H14 O3    | P-1                | 2                  | O=C1CCCCC2C(COC2=O)C1          | 0.00                                        | 0.242                               | 0              |
| YERJIO      | C6 H8 N2 O2   | Pccn               | 56                 | O=C1NC2CCCC1NC2=O              | 0.14                                        | 0.177                               | 1              |
| YERJOU      | C6 H8 N2 O2   | P21212             | 18                 | O=C1NC2CC1NC2=O                | 0.00                                        | 0.114                               | 0              |
| YETRIY      | C12 H12 O2    | C2/c               | 15                 | O=C1OC2C34CC=CCC3(C=C2)C14     | 2.17                                        | 0.230                               | 8              |
| YIBCOD      | C11 H11 N1 O1 | P21/n              | 14                 | O=C1C2=CC=CN2C2C3CCCC123       | 0.26                                        | 0.182                               | 1              |
| YIGTEO      | C8 H6 O4      | P21/n              | 14                 | C1Oc2cc3OCc3cc2O1              | 1.25                                        | 1.658                               | 7              |
| YIMNEO      | C12 H12 O3    | P21/c              | 14                 | O=C1CCC23OC4(CCC(=O)C4C12)C=C3 | 0.00                                        | 0.170                               | 0              |
| YIRFUA      | C12 H12 O1    | P212121            | 19                 | O=C1CCC2CC2c2cccc12            | 0.00                                        | 0.102                               | 0              |
| YITWOQ      | C9 H6 O3      | P212121            | 19                 | O=C1COC(=O)c2cccc12            | 0.00                                        | 0.216                               | 0              |
| YOBQAH      | C4 H5 N1 O2   | P21/c              | 14                 | C=C1CN(C(=O)O)O1               | 1.76                                        | 0.243                               | 4              |
| YOKZAB      | C11 H9 N1 O3  | P21/c              | 14                 | O=C1CCC2OC(=O)c3cccc3N12       | 0.00                                        | 0.252                               | 0              |
| YONFAK      | C13 H11 N1 O1 | P21/c              | 14                 | O=C1CCCc2nc3cccc3cc12          | 0.00                                        | 0.177                               | 0              |
| YOPXIL      | C8 H11 N1 O1  | P21                | 4                  | O=C1NCC2C=CCCC12               | 0.00                                        | 0.188                               | 0              |
| YOWLECO1    | C11 H14 N4    | Pbca               | 61                 | C1N2CN3CN1CN(C2)c1cccc31       | 0.00                                        | 0.360                               | 0              |
| YOZKUT      | C9 H12 O2     | P41212             | 92                 | O=C1CC2CC(C1)CC(=O)C2          | 2.16                                        | 0.102                               | 5              |
| YULDIU      | C12 H16 O2    | P21/n              | 14                 | O=C1CC23CCCCC2(C1)CC(=O)C3     | 0.00                                        | 0.155                               | 0              |
| YUQWOX      | C11 H7 N3     | P21/c              | 14                 | N=C1c2ccnc2c2ncccc12           | 15.05                                       | 1.127                               | 148            |
| YUXLEI      | C13 H9 N1 O1  | Pna21              | 33                 | O1c2cccc2C=Nc2cccc12           | 0.39                                        | 0.212                               | 2              |
| YUYFAZ      | C9 H13 N1 O3  | Pbca               | 61                 | O=C1OCC2ON3CCCCC3C12           | 0.12                                        | 0.222                               | 1              |
| YUYFED      | C10 H15 N1 O3 | P212121            | 19                 | O=C1OCC2ON3CCCCC3C12           | 0.00                                        | 0.172                               | 0              |
| YUYLUZ      | C10 H8 O4     | P21/c              | 14                 | O=C1C2OC=CC1C1OC=CC2C1=O       | 4.98                                        | 0.170                               | 3              |
| ZASGUY      | C4 H4 N2 O2   | P21/c              | 14                 | O=C1NC=CNC1=O                  | 0.66                                        | 0.313                               | 2              |

Table S3 (continued)

| CSD Refcode | Formula       | Space Group symbol | Space Group number | SMILES                            | Energy rank $\Delta E(\text{CSP})$ / kJ/mol | RMSD <sub>30</sub> of CSP match / Å | Numerical rank |
|-------------|---------------|--------------------|--------------------|-----------------------------------|---------------------------------------------|-------------------------------------|----------------|
| ZEFXIR01    | C7 H6 N2 O1   | P21/n              | 14                 | O=C1Nc2ccccc2N1                   | 0.02                                        | 0.317                               | 1              |
| ZELDOJ      | C6 H2 F4      | P21/n              | 14                 | Fc1ccc(F)c(F)c1F                  | 0.86                                        | 0.293                               | 8              |
| ZELDOJ01    | C6 H2 F4      | C2/c               | 15                 | Fc1ccc(F)c(F)c1F                  | 0.34                                        | 2.168                               | 1              |
| ZETGOX      | C9 H12 O4     | P212121            | 19                 | O=C1OC2COCOC3CC2C13               | 0.00                                        | 0.146                               | 0              |
| ZETGUD      | C10 H12 O4    | P212121            | 19                 | O=C1CCC2CC3C2C(CO1)OC3=O          | 0.00                                        | 0.238                               | 0              |
| ZOBXIX      | C11 H13 N1 O1 | P-1                | 2                  | O=C1NC2C3CC4C5CC(C2C35)C14        | 0.26                                        | 0.262                               | 1              |
| ZOBXOD      | C11 H13 N1 O1 | P21/c              | 14                 | O=C1NC2C3CC4C5C3CC2C5C14          | 0.00                                        | 0.114                               | 0              |
| ZOPPAL      | C3 F4         | Pbcn               | 60                 | FC1=C(F)C1(F)F                    | 0.76                                        | 0.221                               | 7              |
| ZOKQJC      | C11 H13 N1 O3 | P21                | 4                  | O=C1CCC2CC=CCC32COC(=O)N13        | 1.37                                        | 1.471                               | 3              |
| ZORQJG      | C15 H14       | P21/c              | 14                 | C1C2C3C4C1C1C2C2(C=C2)C3C4C21C=C2 | 0.00                                        | 0.205                               | 0              |
| ZOTCTD10    | C11 H14 N2 O2 | C2/c               | 15                 | O=C1CC2CCC3CC(=O)N4CCN1C234       | 0.00                                        | 0.169                               | 0              |
| ZOYLH13     | C8 H7 N1 O1   | P21/c              | 14                 | O=C1C2ccccc2N1                    | 3.86                                        | 0.232                               | 19             |
| ZTCDON10    | C9 H13 N1 O1  | P21/c              | 14                 | O=C1NC2CC3COC2C1C3                | 3.63                                        | 0.304                               | 13             |
| ZTNONX      | C7 H8 N2 O2   | P21/n              | 14                 | [O]N1=N([O])C2C3CC4C(C24)C13      | 0.00                                        | 0.152                               | 0              |
| ZUFJER      | C8 H2 F4 N2   | P21/n              | 14                 | Fc1c(F)c(F)c2nccnc2c1F            | 1.38                                        | 0.276                               | 2              |
| ZUFJIV      | C8 H3 F3 N2   | Pca21              | 29                 | Fc1cc(F)c2nccnc2c1F               | 1.50                                        | 0.232                               | 4              |
| ZUMKUN      | C13 H16 O2    | P21/c              | 14                 | O=C1C2CCC31CCCCC13OC2C=C1         | 2.32                                        | 0.158                               | 5              |
| ZUNTAD      | C9 H8 O4      | P212121            | 19                 | O=C1C2COC(C1=O)C(=O)C2=O          | 0.00                                        | 0.201                               | 0              |
| ZUTKEG      | C4 H3 N5 O1   | Pnma               | 62                 | O=C1NC=CC2=NN=NN12                | 0.00                                        | 0.240                               | 0              |
| ZZZJIE01    | C10 H6 O2     | Pc                 | 7                  | O=C1C=Cc2ccccc2C1=O               | 2.40                                        | 0.254                               | 1              |
| ZZZKEA01    | C6 H4 N2 O2   | P-1                | 2                  | [O-][N+]=C2C=CC=CC2=NO1           | 0.00                                        | 0.196                               | 0              |
| ZZZRNYY02   | C11 H8 N2     | P212121            | 19                 | N1c2ccccc2c2ccnc12                | 3.39                                        | 0.250                               | 20             |
| ZZZSAE01    | C8 H8         | Aba2               | 41                 | C1=CC=CC=CC=C1                    | 0.00                                        | 0.119                               | 0              |
| ZZZVYE01    | C5 H10        | P21/c              | 14                 | C1CCCC1                           | 0.43                                        | 0.834                               | 3              |
| ZZZWEO02    | C4 H8         | I2/m               | 12                 | C1CCCC1                           | 1.20                                        | 0.766                               | 6              |
| ZZZWGK01    | C6 H10 O1     | P212121            | 19                 | O=C1CCCCC1                        | 0.26                                        | 0.125                               | 4              |
| ZZZWGK04    | C6 H10 O1     | P21/n              | 14                 | O=C1CCCCC1                        | 1.79                                        | 0.183                               | 26             |
